# Supplementary material for: Continuous activation of phenoxide and CF3I for multiple trifluoromethylations
Source: Royal Society of Chemistry journal article supplement (doi:10.1039/d4cc06221c), 2024-12-17

# **Continuous activation of phenoxide and CF<sub>3</sub>I for multiple trifluoromethylations**

*Yusei Nakashima, Shinjiro Kusano, Tsukasa Inishi, Yasuyuki Nitta, Takashi Nishikata\**

*Graduate School of Science and Engineering, Yamaguchi University 2-16-1 Tokiwadai,  
Ube, Yamaguchi, 755-8611, Japan*

## **Contents**

|                                                       |     |
|-------------------------------------------------------|-----|
| 1. General Information                                | S2  |
| 2. Optimization and Comparison of Reaction Conditions | S4  |
| 3. Mechanistic Studies                                | S6  |
| 4. General Procedure                                  | S9  |
| 5. References                                         | S19 |
| 6. Spectral Charts for Products                       | S44 |

## 1. General Information

All reactions were carried out under nitrogen (99.95%) atmosphere. For TLC analyses precoated Kieselgel 60 F254 plates (Merck, 0.25 mm thick) were used; for column chromatography Silica Flash® P60 (SiliCycle, 40–63  $\mu\text{m}$ ) was used. Visualization was accomplished by UV light (254 nm),  $^1\text{H}$ ,  $^{13}\text{C}$ , and  $^{19}\text{F}$  NMR spectra were obtained using a JEOL 500 MHz NMR spectrometer. Chemical shifts for  $^1\text{H}$  NMR were described in parts per million (chloroform as an internal standard  $\delta = 7.26$ ) in  $\text{CDCl}_3$ , unless otherwise noted. Chemical shifts for  $^{13}\text{C}$  NMR were expressed in parts per million in  $\text{CDCl}_3$  as an internal standard ( $\delta = 77.16$ ), unless otherwise noted. High resolution mass analyses (HRMS) were obtained using an ACQUITY UPLC/TOF-MS for ESI. Infrared spectra were recorded on Agilent Technologies Cary 630 FTIR. Anhydrous solvents were purchased from Kanto Chemical Co., Ltd. Other chemicals were purchased from TCI, Aldrich, and Wako and directly used without further purification. UV-visible absorption spectra were recorded on a JASCO V-750 spectrometer. Fluorescence spectra were recorded on a JASCO FP-8250 fluorescence spectrometer.  $\text{CF}_3\text{I}$  was obtained from Tosoh Finechem corporation.

### The light source and the material of the irradiation vessel

Hepatochem EvoluChem™ PhotoRedOx Device, equipped with EvoluChem™ LED 18W light. A cardboard cover was placed over the reactor during reactions. Capable of carrying out up to 8 reactions at one time (4 mL vials).

LED light manufacture: EvoluChem™

Model: EvoluChem LED 18W, P201-18-2 450-455 nm

or EvoluChem LED 30W, HCK1012-01-008 450 nm

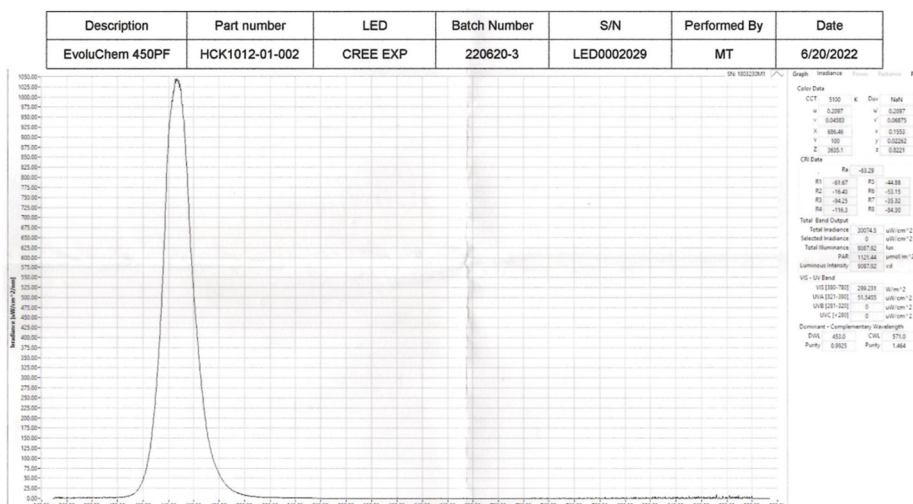

Figure S1. Spectral distribution and intensity

Material of the irradiation vessel: borosilicate reaction vial

Not use any filters

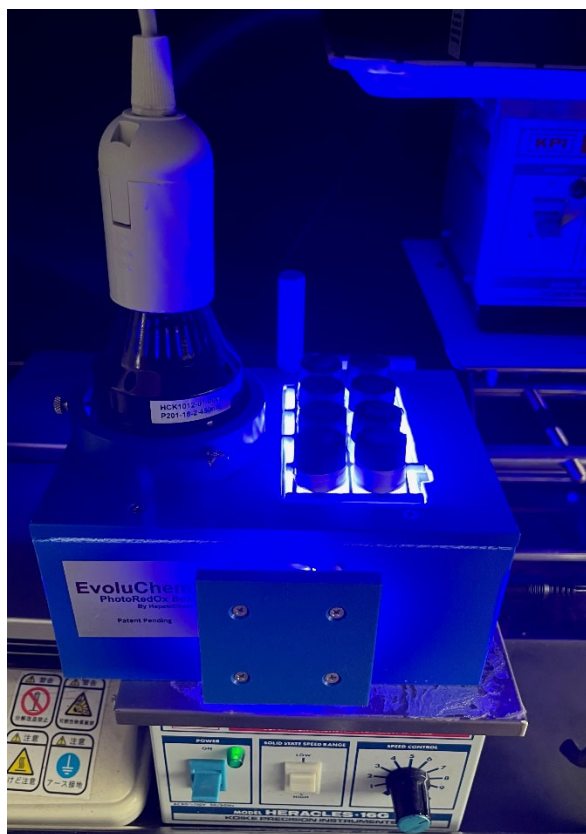

**Figure S2.** Photoredox reaction set-up.

## 2. Optimization and Comparison of Reaction Conditions

Table S1. Optimization of solvent

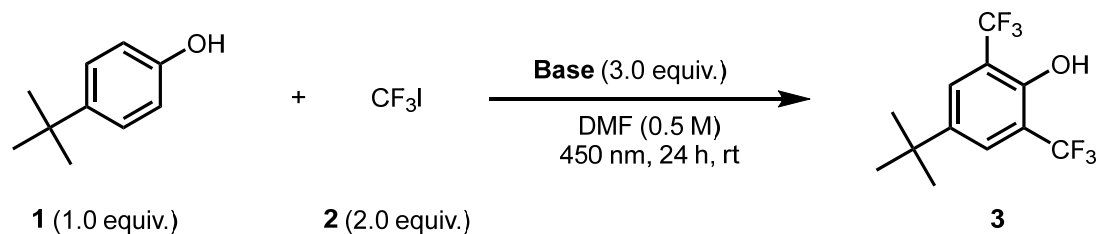

| Entry | Base                     | NMR Yield of <b>3</b> |
|-------|--------------------------|-----------------------|
| 1     | none                     | 0%                    |
| 2     | $\text{Cs}_2\text{CO}_3$ | 67%                   |
| 3     | $\text{Li}_2\text{CO}_3$ | 0%                    |
| 4     | $\text{Na}_2\text{CO}_3$ | 0%                    |
| 5     | $\text{K}_2\text{HPO}_4$ | 0%                    |
| 6     | <i>t</i> BuOK            | 27%                   |
| 7     | $\text{NEt}_3$           | 0%                    |
| 8     | <i>i</i> PrNEt           | 0%                    |
| 9     | DABCO                    | 20%                   |

Table S2. Optimization of base

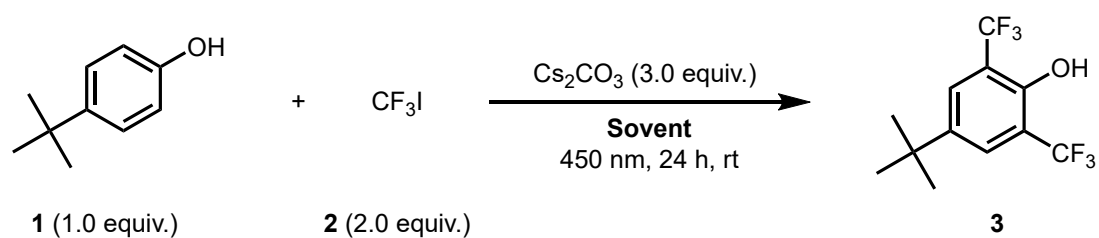

| Entry | Solvent     | NMR Yield of <b>3</b> |
|-------|-------------|-----------------------|
| 1     | DMF         | 67%                   |
| 2     | DMSO        | 56%                   |
| 3     | AcOEt       | 39%                   |
| 4     | Acetone     | 0%                    |
| 5     | MeCN        | 34%                   |
| 6     | 1,4-dioxane | 33%                   |
| 7     | THF         | 16%                   |

**Table S3. Optimization of wave length**

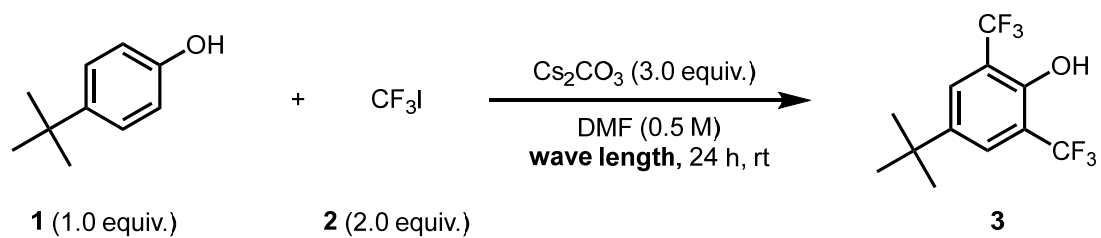

| Entry | wave lenght | NMR Yield of <b>3</b> |
|-------|-------------|-----------------------|
| 1     | 365 nm      | 33%                   |
| 2     | 405 nm      | 24%                   |
| 3     | 450 nm      | 67%                   |
| 4     | 545 nm      | trace                 |
| 5     | w/o light   | 0%                    |

### 3. Mechanistic Studies

#### Radical inhibitor test

An oven-dried 5.0 mL screw-cap vial equipped with a magnetic stir bar was charged with phenol **1a** (75.1 mg, 0.5 mmol, 1.0 equiv.), Cs<sub>2</sub>CO<sub>3</sub> (488.7 mg, 1.5 mmol, 3.0 equiv.) and 1,4-dinitrobenzene (84.1 mg, 0.5 mmol, 1.0 equiv.) as single electron transfer inhibitor or TEMPO (78.1 mg, 0.5 mmol, 1.0 equiv.) or BHT (110.2 mg, 0.5 mmol, 1.0 equiv.) as radical inhibitor. After flashing nitrogen gas (purity 99.95%), CF<sub>3</sub>I **2** (1.0 mmol, 2.0 equiv.) was added as DMF solution and dried DMF (1.0 mL) were added into the vial by syringe under nitrogen atmosphere. The reaction mixture was vigorously stirred under irradiation of 18W 450 nm LED at room temperature for 24 h. After this time, the reaction mixture was carefully quenched with 3M HCl aq. at 0°C and extracted with Et<sub>2</sub>O. The combined organic layers were filtered through MgSO<sub>4</sub>, and then concentrated by rotary evaporation. Yield was determined by <sup>19</sup>F NMR analysis using benzotrifluoride as an internal standard.

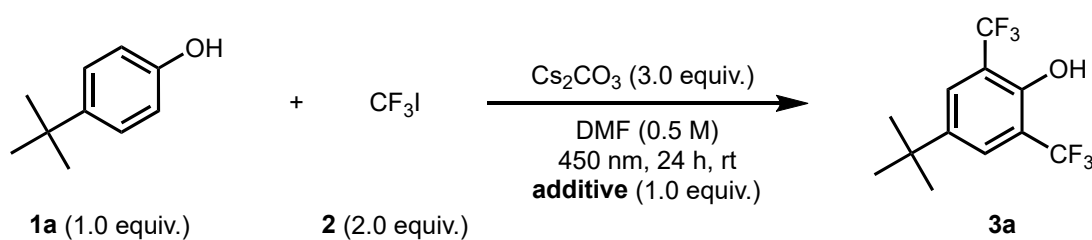

| Entry | Condition            | NMR Yield of <b>3</b> |
|-------|----------------------|-----------------------|
| 1     | w BHT                | 35%                   |
| 2     | w TEMPO              | trace                 |
| 3     | w 1,4-Dinitrobenzene | 0%                    |

**Figure S3.** Radical inhibitor test

#### UV-Vis Experiments

UV-Vis spectra of the individual component were recorded, including substrate CF<sub>3</sub>I, 4-tBuPhenol, Cs<sub>2</sub>CO<sub>3</sub>. All of the samples were prepared as a 10.0 μM solution in glovebox and used freshly for the measurement.

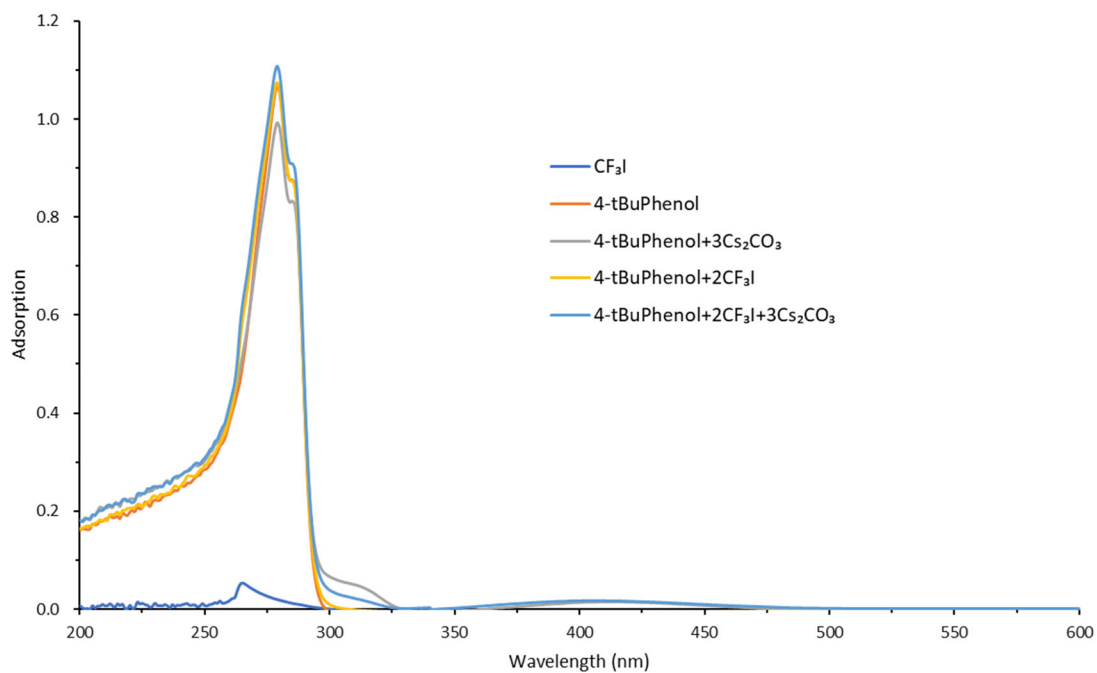

**Figure S4.** UV-Vis spectra of the related component recorded in DMF

#### Luminescence quenching experiment

All **1a** +  $\text{Cs}_2\text{CO}_3$  solutions were excited at 410 nm and the emission intensity at 481 nm was observed. In a typical experiment, the DMF solution of **1a** +  $\text{Cs}_2\text{CO}_3$  was added the appropriate amount of quencher,  $\text{CF}_3\text{I}$  (**2**) in a 1.0 cm quartz cuvette. After preparing the solution, the emission spectra of the samples were collected.

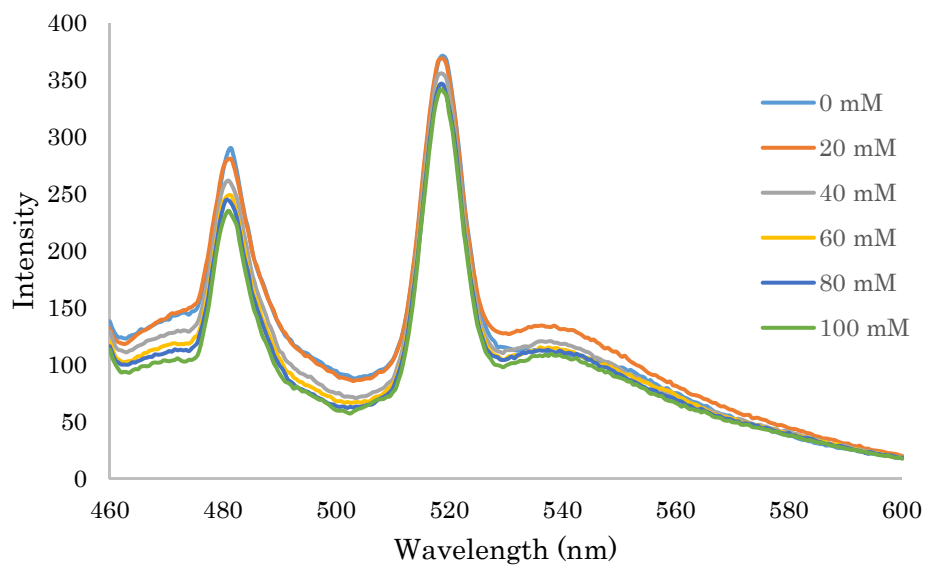

**Figure S5.** Luminescence spectral changes of **1a** +  $\text{Cs}_2\text{CO}_3$  ( $1.0 \times 10^{-3} \text{ M}$ ,  $\lambda_{\text{ex}} = 410 \text{ nm}$ ) upon the addition of  $\text{CF}_3\text{I}$  (**2**) as quencher in degassed DMF.

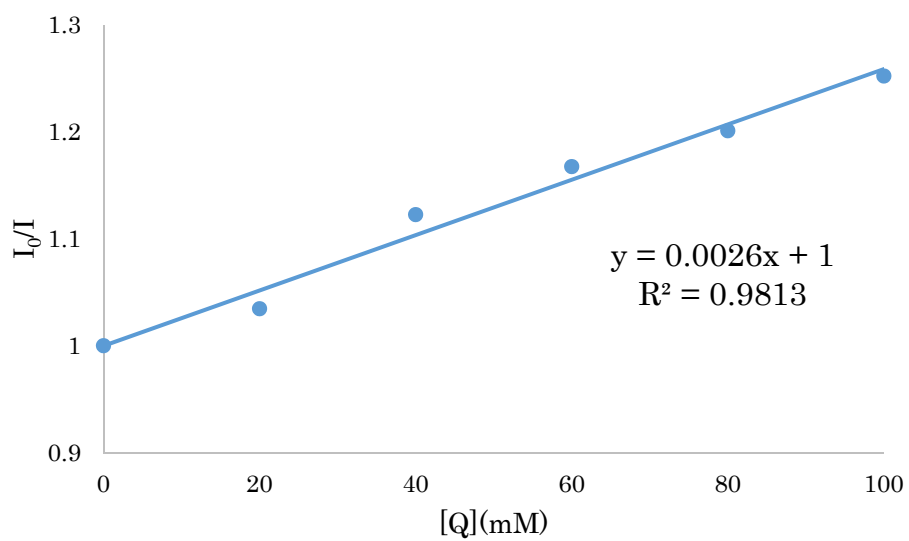

**Figure S6.** Stern-Volmer plot.



## 4. General procedure

### General procedure for the synthesis of **3**

An oven-dried 5.0 mL screw-cap vial equipped with magnetic stir bar was charged with corresponding phenol **1** (0.5 mmol, 1.0 equiv.) and Cs<sub>2</sub>CO<sub>3</sub> (488.7 mg, 1.5 mmol, 3.0 equiv.). After flashing nitrogen gas (purity 99.95%), CF<sub>3</sub>I **2** (1.0 mmol, 2.0 equiv.) was added as DMF solution and dried DMF (1.0 mL) were added into the vial by syringe under nitrogen atmosphere. The reaction mixture was vigorously stirred under irradiation of 18W 450 nm LED at room temperature for 24 h. After this time, the reaction mixture was carefully quenched with 3M HCl aq. at 0°C and extracted with Et<sub>2</sub>O. The combined organic layers were filtered through MgSO<sub>4</sub>, and then concentrated by rotary evaporation. Yield was determined by <sup>19</sup>F NMR analysis using benzotrifluoride as an internal standard. After the mixture was concentrated by evaporation, the residue was purified by flash chromatography, eluting hexane/EtOAc to afford the product **3**.

#### 4-(tert-butyl)phenol (**3a**)<sup>1</sup>

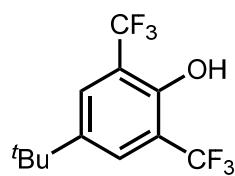

**3a**

Following the general procedure above, using phenol **1a** (75.1 mg, 0.5 mmol, 1.0 equiv.), CF<sub>3</sub>I (1.0 mmol, 2.0 equiv.), Cs<sub>2</sub>CO<sub>3</sub> (488.7 mg, 1.5 mmol, 3.0 equiv.) and DMF (1.0 mL) under irradiation of 18W 450 nm LED at room temperature for 24 h, yielded the product **3a** (88.7 mg, 62%); <sup>1</sup>H NMR (CDCl<sub>3</sub>) δ: 1.33 (s, 9H), 5.90 (brs, 1H), 7.70 (s, 2H). <sup>13</sup>C NMR (CDCl<sub>3</sub>) δ: 31.2, 34.6, 118.3 (q, *J* = 30.3 Hz), 123.9 (q, *J* = 273.2 Hz), 127.7 (q, *J* = 4.6 Hz), 144.0, 149.6. <sup>19</sup>F NMR (CDCl<sub>3</sub>) δ: -60.7.

#### 4-benzyl-2,6-bis(trifluoromethyl)phenol (**3b**)

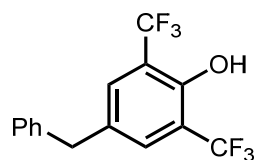

**3b**

Following the general procedure above, using phenol **1b** (92.1 mg, 0.5 mmol, 1.0 equiv.), CF<sub>3</sub>I (1.0 mmol, 2.0 equiv.), Cs<sub>2</sub>CO<sub>3</sub> (488.7 mg, 1.5 mmol, 3.0 equiv.) and DMF (1.0 mL) under irradiation of 18W 450 nm LED at room temperature for 24 h, yielded the product **3b** (67.2 mg, 42%); <sup>1</sup>H NMR (CDCl<sub>3</sub>) δ: 3.98 (s, 2H), 5.92 (brs, 1H), 7.16 (d, *J* = 7.8 Hz, 2H), 7.24-7.27 (m, 1H), 7.33 (t, *J* = 8.0

Hz, 2H), 7.53 (s, 2H).  $^{13}\text{C}$  NMR ( $\text{CDCl}_3$ )  $\delta$ : 40.8, 118.9 (q,  $J = 30.7$  Hz), 123.5 (q,  $J = 272.9$  Hz), 126.9, 128.8, 129.0, 131.0 (d,  $J = 4.5$  Hz), 134.0, 139.5, 150.3.  $^{19}\text{F}$  NMR ( $\text{CDCl}_3$ )  $\delta$ : -60.9; HRMS (TOF-MS) calcd. for  $\text{C}_{15}\text{H}_9\text{F}_6\text{O}$  ( $\text{M-H}^+$ ): 319.0558; found 319.0557

4-(2-phenylpropan-2-yl)-2,6-bis(trifluoromethyl)phenol (**3c**)

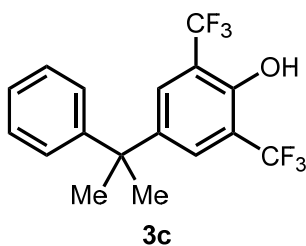

Following the general procedure above, using phenol **1c** (106.1 mg, 0.5 mmol, 1.0 equiv.),  $\text{CF}_3\text{I}$  (1.0 mmol, 2.0 equiv.),  $\text{Cs}_2\text{CO}_3$  (488.7 mg, 1.5 mmol, 3.0 equiv.) and DMF (1.0 mL) under irradiation of 18W 450 nm LED at room temperature for 24 h, yielded the product **3c** (85.3 mg, 49%); IR (neat)  $\nu$  3618, 2973, 1613, 1490, 1363, 1271, 1111  $\text{cm}^{-1}$ ;  $^1\text{H}$  NMR ( $\text{CDCl}_3$ )  $\delta$ : 1.69 (s, 6H), 5.92 (brs, 1H), 7.17 (d,  $J = 7.5$  Hz, 2H), 7.22 (t,  $J = 6.8$  Hz, 1H), 7.30 (t,  $J = 7.6$  Hz, 2H), 7.55 (s, 2H).  $^{13}\text{C}$  NMR ( $\text{CDCl}_3$ )  $\delta$ : 30.8, 42.8, 118.3 (q,  $J = 30.4$  Hz), 123.6 (q,  $J = 273.1$  Hz), 126.5, 126.7, 128.6, 129.1 (d,  $J = 4.4$  Hz), 143.7, 148.9, 149.8.  $^{19}\text{F}$  NMR ( $\text{CDCl}_3$ )  $\delta$ : -60.7; HRMS (TOF-MS) calcd. for  $\text{C}_{17}\text{H}_{13}\text{F}_6\text{O}$  ( $\text{M-H}^+$ ): 347.0871; found 347.0873

3,5-bis(trifluoromethyl)-[1,1'-biphenyl]-4-ol (**3d**)

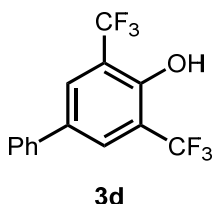

Following the general procedure above, using phenol **1d** (153.1 mg, 0.5 mmol, 1.0 equiv.),  $\text{CF}_3\text{I}$  (2.0 mmol, 4.0 equiv.),  $\text{Cs}_2\text{CO}_3$  (488.7 mg, 1.5 mmol, 3.0 equiv.) and DMF (1.0 mL) under irradiation of 18W 450 nm LED at room temperature for 24 h, yielded the product **3d** (81.1 mg, 53%); IR (neat)  $\nu$  3540, 1610, 1478, 1260, 1118  $\text{cm}^{-1}$ ;  $^1\text{H}$  NMR ( $\text{CDCl}_3$ )  $\delta$ : 6.07 (brs, 1H), 7.41 (t,  $J = 7.8$  Hz, 1H), 7.48 (t,  $J = 7.4$  Hz, 2H), 7.54 (d,  $J = 8.0$  Hz, 2H), 7.92 (s, 2H).  $^{13}\text{C}$  NMR ( $\text{CDCl}_3$ )  $\delta$ : 119.2 (q,  $J = 30.9$  Hz), 123.5 (q,  $J = 272.8$  Hz), 126.9(m), 127.0, 128.4(m), 129.3(m), 134.3, 138.1, 151.0;  $^{19}\text{F}$  NMR ( $\text{CDCl}_3$ )  $\delta$ : -60.9; HRMS (TOF-MS) calcd. for  $\text{C}_{14}\text{H}_7\text{F}_6\text{O}$  ( $\text{M-H}^+$ ): 305.0401; found 305.0404

4-(2-hydroxyethyl)-2,6-bis(trifluoromethyl)phenol (**3e**)

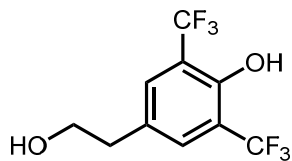

**3e**

Following the general procedure above, using phenol **1e** (69.1 mg, 0.5 mmol, 1.0 equiv.),  $\text{CF}_3\text{I}$  (1.0 mmol, 2.0 equiv.),  $\text{Cs}_2\text{CO}_3$  (488.7 mg, 1.5 mmol, 3.0 equiv.) and DMF (1.0 mL) under irradiation of 18W 450 nm LED at room temperature for 24 h, yielded the product **3e** (43.9 mg, 32%); IR (neat)  $\nu$  3454, 2960, 2904, 1606, 1492, 1280, 1113  $\text{cm}^{-1}$ ;  $^1\text{H}$  NMR ( $\text{CDCl}_3$ )  $\delta$ : 1.41 (t,  $J = 5.2$  Hz, 1H), 2.88 (t,  $J = 6.3$  Hz, 2H), 3.89 (q,  $J = 5.7$  Hz, 2H), 5.96 (brs, 1H), 7.60 (s, 2H).  $^{13}\text{C}$  NMR ( $\text{DMSO-d}_6$ )  $\delta$ : 37.2, 61.4, 120.2 (q,  $J = 29.7$  Hz), 123.5 (q,  $J = 273.7$  Hz), 131.2 (d,  $J = 3.9$  Hz), 132.5, 151.1.  $^{19}\text{F}$  NMR ( $\text{CDCl}_3$ )  $\delta$ : -60.9.; HRMS (TOF-MS) calcd. for  $\text{C}_{10}\text{H}_7\text{F}_6\text{O}_2$  ( $\text{M-H}^+$ ): 273.0350; found 273.0353

4-ethoxy-2,6-bis(trifluoromethyl)phenol (**3f**)

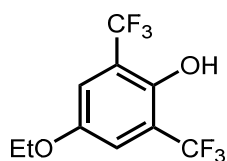

**3f**

Following the general procedure above, using phenol **1f** (69.1 mg, 0.5 mmol, 1.0 equiv.),  $\text{CF}_3\text{I}$  (1.0 mmol, 2.0 equiv.),  $\text{Cs}_2\text{CO}_3$  (488.7 mg, 1.5 mmol, 3.0 equiv.) and DMF (1.0 mL) under irradiation of 18W 450 nm LED at room temperature for 24 h, yielded the product **3f** (46.6 mg, 34%); IR (neat)  $\nu$  3625, 2987, 1612, 1477, 1355, 1260, 1111  $\text{cm}^{-1}$ ;  $^1\text{H}$  NMR ( $\text{CDCl}_3$ )  $\delta$ : 1.42 (t,  $J = 7.0$  Hz, 3H), 4.03 (q,  $J = 7.0$  Hz, 2H), 5.60 (brs, 1H), 7.23 (s, 2H).  $^{13}\text{C}$  NMR ( $\text{CDCl}_3$ )  $\delta$ : 14.7, 64.8, 116.7 (d,  $J = 4.9$  Hz), 119.7 (q,  $J = 31.0$  Hz), 123.2 (q,  $J = 273.0$  Hz), 145.2, 152.2;  $^{19}\text{F}$  NMR ( $\text{CDCl}_3$ )  $\delta$ : -61.2.; HRMS (TOF-MS) calcd. for  $\text{C}_{10}\text{H}_7\text{F}_6\text{O}_2$  ( $\text{M-H}^+$ ): 273.0350; found 273.0350

4-phenoxy-2,6-bis(trifluoromethyl)phenol (**3g**)

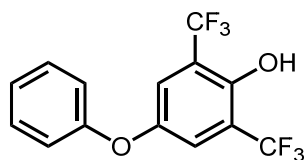

**3g**

Following the general procedure above, using phenol **1g** (93.1 mg, 0.5 mmol, 1.0 equiv.),  $\text{CF}_3\text{I}$  (2.0 mmol, 4.0 equiv.),  $\text{Cs}_2\text{CO}_3$  (488.7 mg, 1.5 mmol, 3.0 equiv.) and DMF (1.0 mL) under irradiation of

18W 450 nm LED at room temperature for 24 h, yielded the product **3g** (88.6 mg, 55%); IR (neat)  $\nu$  3620, 3071, 1592, 1479, 1361, 1115  $\text{cm}^{-1}$ ;  $^1\text{H}$  NMR ( $\text{CDCl}_3$ )  $\delta$ : 5.83 (brs, 1H), 6.98 (d,  $J = 8.0$  Hz, 2H), 7.18 (t,  $J = 7.4$  Hz, 1H), 7.37-7.40 (m, 4H).  $^{13}\text{C}$  NMR ( $\text{CDCl}_3$ )  $\delta$ : 118.8, 120.0 (q,  $J = 31.2$  Hz), 121.1 (q,  $J = 4.8$  Hz), 123.0 (q,  $J = 272.2$  Hz), 124.4, 130.3, 147.3, 150.2, 156.5.  $^{19}\text{F}$  NMR ( $\text{CDCl}_3$ )  $\delta$ : -61.2.; HRMS (TOF-MS) calcd. for  $\text{C}_{14}\text{H}_7\text{F}_6\text{O}_2$  ( $\text{M-H}^+$ ): 321.0350; found 321.0351

#### 4-(methylthio)-2,6-bis(trifluoromethyl)phenol (**3h**)

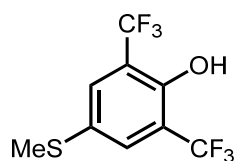

**3h**

Following the general procedure above, using phenol **1h** (70.1 mg, 0.5 mmol, 1.0 equiv.),  $\text{CF}_3\text{I}$  (1.0 mmol, 2.0 equiv.),  $\text{Cs}_2\text{CO}_3$  (488.7 mg, 1.5 mmol, 3.0 equiv.) and DMF (1.0 mL) under irradiation of 18W 450 nm LED at room temperature for 24 h, yielded the product **3h** (55.2 mg, 40%); IR (neat)  $\nu$  3524, 1596, 1475, 1347, 1264, 1105  $\text{cm}^{-1}$ ;  $^1\text{H}$  NMR ( $\text{CDCl}_3$ )  $\delta$ : 2.51 (s, 3H), 5.95 (brs, 1H), 7.62 (s, 2H).  $^{13}\text{C}$  NMR ( $\text{CDCl}_3$ )  $\delta$ : 17.2, 119.6 (q,  $J = 30.9$  Hz), 123.1 (q,  $J = 273.1$  Hz), 129.9 (d,  $J = 4.3$  Hz), 131.0, 149.7.  $^{19}\text{F}$  NMR ( $\text{CDCl}_3$ )  $\delta$ : -61.1; HRMS (TOF-MS) calcd. for  $\text{C}_9\text{H}_5\text{F}_6\text{OS}$  ( $\text{M-H}^+$ ): 274.9965; found 274.9967

#### 1-(4-hydroxy-3,5-bis(trifluoromethyl)phenyl)heptan-1-one (**3i**)

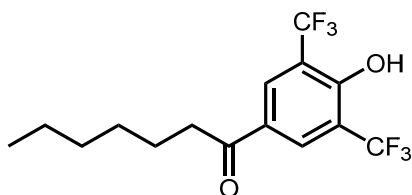

**3i**

Following the general procedure above, using phenol **1i** (103.1 mg, 0.5 mmol, 1.0 equiv.),  $\text{CF}_3\text{I}$  (1.0 mmol, 2.0 equiv.),  $\text{Cs}_2\text{CO}_3$  (488.7 mg, 1.5 mmol, 3.0 equiv.) and DMF (1.0 mL) under irradiation of 18W 450 nm LED at room temperature for 24 h, yielded the product **3i** (80.4 mg, 47%); IR (neat)  $\nu$  3242, 2932, 2963, 1682, 1594, 1493, 1238, 1109  $\text{cm}^{-1}$ ;  $^1\text{H}$  NMR ( $\text{CDCl}_3$ )  $\delta$ : 0.90 (t,  $J = 7.0$  Hz, 3H), 1.31-1.40 (m, 6H), 1.74 (quint,  $J = 7.5$  Hz, 2H), 2.94 (t,  $J = 7.3$  Hz, 2H), 8.34 (s, 2H).  $^{13}\text{C}$  NMR ( $\text{CDCl}_3$ )  $\delta$ : 14.1, 22.6, 24.1, 29.0, 31.7, 38.4, 119.1 (q,  $J = 31.6$  Hz), 123.0 (q,  $J = 273.5$  Hz), 129.7, 131.0 (d,  $J = 4.9$  Hz), 155.4, 197.2.  $^{19}\text{F}$  NMR ( $\text{CDCl}_3$ )  $\delta$ : -61.1.; HRMS (TOF-MS) calcd. for  $\text{C}_{15}\text{H}_{15}\text{F}_6\text{O}_2$  ( $\text{M-H}^+$ ): 341.0976; found 341.0978

(4-hydroxy-3,5-bis(trifluoromethyl)phenyl)(phenyl)methanone (**3j**)

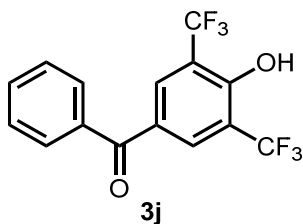

Following the general procedure above, using phenol **1j** (167.1 mg, 0.5 mmol, 1.0 equiv.), CF<sub>3</sub>I (2.0 mmol, 4.0 equiv.), Cs<sub>2</sub>CO<sub>3</sub> (488.7 mg, 1.5 mmol, 3.0 equiv.) and DMF (1.0 mL) under irradiation of 18W 450 nm LED at room temperature for 24 h, yielded the product **3j** (61.8 mg, 37%); IR (neat)  $\nu$  3164, 1488, 1254, 1116, 930 cm<sup>-1</sup>; <sup>1</sup>H NMR (CDCl<sub>3</sub>)  $\delta$ : 6.74 (brs, 1H), 7.54 (t,  $J$  = 7.7 Hz, 2H), 7.66 (t,  $J$  = 7.7 Hz, 1H), 7.75 (d,  $J$  = 7.1 Hz, 2H), 8.24 (s, 2H). <sup>13</sup>C NMR (CDCl<sub>3</sub>)  $\delta$ : 119.0 (q,  $J$  = 31.7 Hz), 123.0 (q,  $J$  = 273.2 Hz), 128.9, 129.9, 130.1, 133.0 (q,  $J$  = 4.8 Hz), 133.3, 136.5, 155.1, 193.3. <sup>19</sup>F NMR (CDCl<sub>3</sub>)  $\delta$ : -61.1; HRMS (TOF-MS) calcd. for C<sub>15</sub>H<sub>7</sub>F<sub>6</sub>O<sub>2</sub> (M-H<sup>+</sup>): 333.0350; found 333.0353

Methyl 4-hydroxy-3,5-bis(trifluoromethyl)benzoate (**3k**)

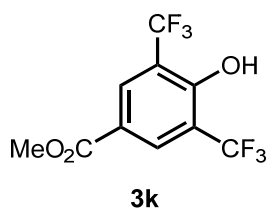

Following the general procedure above, using phenol **1k** (76.1 mg, 0.5 mmol, 1.0 equiv.), CF<sub>3</sub>I (1.0 mmol, 2.0 equiv.), Cs<sub>2</sub>CO<sub>3</sub> (488.7 mg, 1.5 mmol, 3.0 equiv.) and DMF (1.0 mL) under irradiation of 18W 450 nm LED at room temperature for 24 h, yielded the product **3k** (69.2 mg, 48%); IR (neat)  $\nu$  3349, 2965, 1708, 1603, 1440, 1264, 1100 cm<sup>-1</sup>; <sup>1</sup>H NMR (CDCl<sub>3</sub>)  $\delta$ : 3.96 (s, 3H), 6.48 (brs, 1H), 8.43 (s, 2H). <sup>13</sup>C NMR (CDCl<sub>3</sub>)  $\delta$ : 52.9, 119.0 (q,  $J$  = 32.0 Hz), 122.9 (d,  $J$  = 819.2 Hz), 122.9 (t,  $J$  = 137.5 Hz), 132.6, 155.5, 164.7. <sup>19</sup>F NMR (CDCl<sub>3</sub>)  $\delta$ : -61.1; HRMS (TOF-MS) calcd. for C<sub>10</sub>H<sub>5</sub>F<sub>6</sub>O<sub>3</sub> (M-H<sup>+</sup>): 287.0143; found 287.0143

*tert*-butyl (4-hydroxy-3,5-bis(trifluoromethyl)phenyl)carbamate (**3l**)

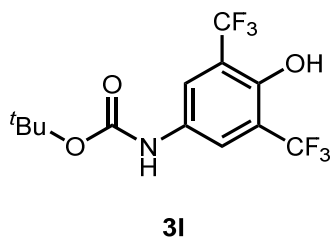

Following the general procedure above, using phenol **1l** (104.6 mg, 0.5 mmol, 1.0 equiv.), CF<sub>3</sub>I (1.0

mmol, 2.0 equiv.), 4CzIPN (19.7 mg, 0.025 mmol, 0.05 equiv.), Cs<sub>2</sub>CO<sub>3</sub> (488.7 mg, 1.5 mmol, 3.0 equiv.) and DMF (1.0 mL) under irradiation of 18W 450 nm LED at room temperature for 5 h, yielded the product **3l** (69.0 mg, 40%); IR (neat)  $\nu$  3611, 3302, 3115, 2981, 1692, 1565, 1493, 1141, 1108 cm<sup>-1</sup>; <sup>1</sup>H NMR (CDCl<sub>3</sub>)  $\delta$ : 1.52 (s, 9H), 5.79 (brs, 1H), 6.50 (brs, 1H), 7.76 (s, 2H). <sup>13</sup>C NMR (CDCl<sub>3</sub>)  $\delta$ : 28.3, 81.7, 119.4 (q,  $J$  = 31.1 Hz), 121.1, 123.2 (q,  $J$  = 272.9 Hz), 131.7, 147.1, 152.7. <sup>19</sup>F NMR (CDCl<sub>3</sub>)  $\delta$ : -61.1.; HRMS (TOF-MS) calcd. for C<sub>13</sub>H<sub>12</sub>F<sub>6</sub>NO<sub>3</sub> (M-H<sup>+</sup>): 344.0721; found 344.0724

4-(methylsulfonyl)-2,6-bis(trifluoromethyl)phenol (**3m**)

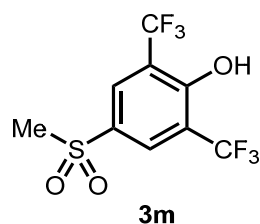

Following the general procedure above, using phenol **1m** (86.1 mg, 0.5 mmol, 1.0 equiv.), CF<sub>3</sub>I (2.0 mmol, 4.0 equiv.), Cs<sub>2</sub>CO<sub>3</sub> (488.7 mg, 1.5 mmol, 3.0 equiv.) and DMF (1.0 mL) under irradiation of 18W 450 nm LED at room temperature for 24 h, yielded the product **3m** (95.5 mg, 62%); IR (neat)  $\nu$  3417, 3107, 2934, 1604, 1481, 1252, 1102 cm<sup>-1</sup>; <sup>1</sup>H NMR (CDCl<sub>3</sub>)  $\delta$ : 3.12 (s, 3H), 8.33 (s, 2H). <sup>13</sup>C NMR (DMSO-d<sub>6</sub>)  $\delta$ : 43.6, 120.2 (q,  $J$  = 30.6 Hz), 122.8 (q,  $J$  = 273.1 Hz), 130.7, 130.8, 158.4; <sup>19</sup>F NMR (CDCl<sub>3</sub>)  $\delta$ : -61.3.; HRMS (TOF-MS) calcd. for C<sub>9</sub>H<sub>5</sub>F<sub>6</sub>O<sub>3</sub>S (M-H<sup>+</sup>): 306.9864; found 306.9865

methyl 2-((tert-butoxycarbonyl)amino)-3-(4-hydroxy-3,5-bis(trifluoromethyl)phenyl)propanoate (**3n**)

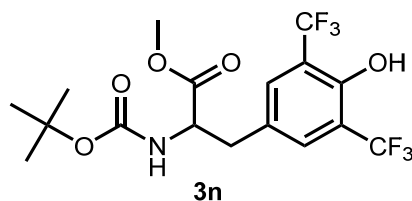

Following the general procedure above, using phenol **1n** (147.7 mg, 0.5 mmol, 1.0 equiv.), CF<sub>3</sub>I (1.0 mmol, 2.0 equiv.), Cs<sub>2</sub>CO<sub>3</sub> (488.7 mg, 1.5 mmol, 3.0 equiv.) and DMF (1.0 mL) under irradiation of 18W 450 nm LED at room temperature for 24 h, yielded the product **3n** (64.7 mg, 30%); IR (neat)  $\nu$  3350, 2982, 1686, 1491, 1252, 1114 cm<sup>-1</sup>; <sup>1</sup>H NMR (CDCl<sub>3</sub>)  $\delta$ : 1.41 (s, 9H), 3.03 (dd,  $J$  = 5.9 and 14.3 Hz, 1H), 3.21 (dd,  $J$  = 5.6 and 14.0 Hz, 1H), 3.74 (s, 3H), 4.57 (q,  $J$  = 6.7 Hz, 1H), 5.12 (d,  $J$  = 7.6 Hz, 1H), 6.52 (brs, 1H), 7.46 (s, 2H). <sup>13</sup>C NMR (CDCl<sub>3</sub>)  $\delta$ : 28.3, 37.2, 52.6, 54.3, 80.6, 119.0 (q,  $J$  = 30.8 Hz), 123.3 (q,  $J$  = 273.3 Hz), 128.8, 131.7, 151.1, 155.1, 171.8. <sup>19</sup>F NMR (CDCl<sub>3</sub>)  $\delta$ : -60.9.; HRMS (TOF-MS) calcd. for C<sub>17</sub>H<sub>18</sub>F<sub>6</sub>NO<sub>5</sub> (M-H<sup>+</sup>): 430.1089; found 430.1091

3,5-bis(trifluoromethyl)-[1,1'-biphenyl]-2-ol (**3o**)

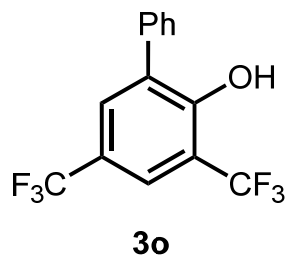

Following the general procedure above, using phenol **1o** (85 mg, 0.5 mmol, 1.0 equiv.),  $\text{CF}_3\text{I}$  (1.0 mmol, 2.0 equiv.),  $\text{Cs}_2\text{CO}_3$  (488.7 mg, 1.5 mmol, 3.0 equiv.) and DMF (1.0 mL) under irradiation of 18W 450 nm LED at room temperature for 24 h, yielded the product **3o** (101 mg, 66%); IR (neat)  $\nu$  3530, 1375, 1269, 1118, 1059, 905, 777, 702, 668  $\text{cm}^{-1}$ ;  $^1\text{H}$  NMR (500 MHz,  $\text{CDCl}_3$ )  $\delta$  6.06 (s, 1H), 7.47-7.45 (m, 2H), 7.52 (t,  $J = 7.39$  Hz, 1H), 7.58 (t,  $J = 7.31$  Hz, 2H), 7.69 (s, 1H), 7.84 (s, 1H);  $^{13}\text{C}$  NMR (125 MHz,  $\text{CDCl}_3$ )  $\delta$  117.9 (q,  $J = 32.1$  Hz), 123.0 (q,  $J = 33.8$  Hz), 123.7 (q,  $J = 271.6$  Hz), 123.2 (q,  $J = 272.9$  Hz), 124.3-124.1(m), 129.2, 129.7, 130.2, 130.7, 130.9 (q,  $J = 3.3$  Hz), 133.8, 153.5;  $^{19}\text{F}$  NMR (470 MHz,  $\text{CDCl}_3$ )  $\delta$  -61.7 (s), -62.5 (s); HRMS (TOF-MS) calcd. for  $\text{C}_{14}\text{H}_7\text{F}_6\text{O}$  ( $\text{M}-\text{H}^+$ ): 305.0401; found 305.0402

### General procedure for the synthesis of **5**

An oven-dried 5.0 mL screw-cap vial equipped with magnetic stir bar was charged with corresponding phenol **4** (0.5 mmol, 1.0 equiv.) and Cs<sub>2</sub>CO<sub>3</sub> (977.4 mg, 3.0 mmol, 6.0 equiv.). After flashing nitrogen gas (purity 99.95%), CF<sub>3</sub>I **2** (7.0 mmol, 14.0 equiv.) was added as DMF solution and dried DMF were added into the vial by syringe under nitrogen atmosphere. The reaction mixture was vigorously stirred under irradiation of 18W 450 nm LED at room temperature for 24 h.

After this time, the reaction mixture was carefully quenched with 3M HCl aq. at 0°C and extracted with Et<sub>2</sub>O. The combined organic layers were filtered through MgSO<sub>4</sub>, and then concentrated by rotary evaporation. Yield was determined by <sup>19</sup>F NMR analysis using benzotrifluoride as an internal standard. After the mixture was concentrated by evaporation, the residue was purified by flash chromatography, eluting hexane/EtOAc to afford the product **5**.

### 3,3',5,5'-tetrakis(trifluoromethyl)-[1,1'-biphenyl]-4,4'-diol (**5a**)

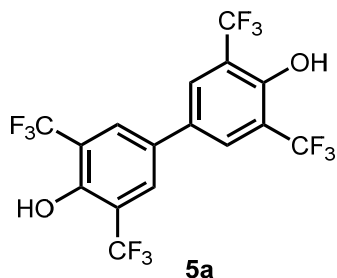

Following the general procedure above, using bisphenol **4a** (93.1 mg, 0.5 mmol, 1.0 equiv.), CF<sub>3</sub>I (7.0 mmol, 14.0 equiv.), and Cs<sub>2</sub>CO<sub>3</sub> (977.4 mg, 3.0 mmol, 6.0 equiv.) under irradiation of 30W 450 nm LED at room temperature for 24 h, yielded the product **5a** (68.7 mg, 30%); IR (neat)  $\nu$  3601, 3557, 1624, 1478, 1343, 1255, 1130, 1085 cm<sup>-1</sup>; <sup>1</sup>H NMR (CDCl<sub>3</sub>)  $\delta$ : 6.20 (brs, 2H), 7.85 (s, 4H). <sup>13</sup>C NMR (DMSO-d<sub>6</sub>)  $\delta$ : 120.7 (q,  $J$  = 30.0 Hz), 123.3 (q,  $J$  = 273.0 Hz), 129.6 (d,  $J$  = 14.8 Hz), 129.9, 152.8. <sup>19</sup>F NMR (CDCl<sub>3</sub>)  $\delta$ : -61.0.; HRMS (TOF-MS) calcd. for C<sub>16</sub>H<sub>5</sub>F<sub>12</sub>O<sub>2</sub> (M-H<sup>+</sup>): 457.0098; found 457.0100

### 4,4'-(propane-2,2-diyl)bis(2,6-bis(trifluoromethyl)phenol) (**5b**)

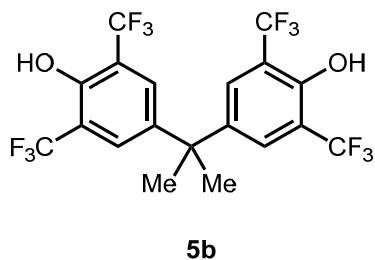

Following the general procedure above, using bisphenol **4b** (114.1 mg, 0.5 mmol, 1.0 equiv.), CF<sub>3</sub>I (7.0 mmol, 14.0 equiv.), and Cs<sub>2</sub>CO<sub>3</sub> (977.4 mg, 3.0 mmol, 6.0 equiv.) under irradiation of 18W 450



nm LED at room temperature for 24 h, yielded the product **5b** (135.1 mg, 54%); IR (neat)  $\nu$  3607, 2989, 1614, 1487, 1362, 1264, 1167, 1087  $\text{cm}^{-1}$ ;  $^1\text{H}$  NMR ( $\text{CDCl}_3$ )  $\delta$ : 1.70 (s, 6H), 6.04 (brs, 1H), 7.51 (s, 4H).  $^{13}\text{C}$  NMR ( $\text{DMSO-d}_6$ )  $\delta$ : 30.2, 42.4, 120.6 (q,  $J = 29.3$  Hz), 123.7 (q,  $J = 272.8$  Hz), 129.3, 141.7, 151.8;  $^{19}\text{F}$  NMR ( $\text{CDCl}_3$ )  $\delta$ : -60.8.; HRMS (TOF-MS) calcd. for  $\text{C}_{19}\text{H}_{11}\text{F}_{12}\text{O}_2$  ( $\text{M-H}^+$ ): 499.0567; found 499.0570

4,4'-(diphenylmethylene)bis(2,6-bis(trifluoromethyl)phenol) (**5c**)

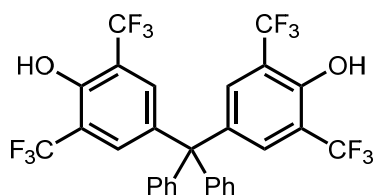

**5c**

Following the general procedure above, using bisphenol **4c** (176.2 mg, 0.5 mmol, 1.0 equiv.),  $\text{CF}_3\text{I}$  (10.0 mmol, 20.0 equiv.), and  $\text{Cs}_2\text{CO}_3$  (1466.1 mg, 4.5 mmol, 9.0 equiv.) under irradiation of 30W 450 nm LED at room temperature for 24 h, yielded the product **5c** (156.1 mg, 50%); IR (neat)  $\nu$  3609, 3561, 2362, 1616, 1488, 1263, 1104  $\text{cm}^{-1}$ ;  $^1\text{H}$  NMR ( $\text{CDCl}_3$ )  $\delta$ : 6.11 (brs, 2H), 7.07 (d,  $J = 7.9$  Hz, 4H), 7.28-7.38 (m, 6H), 7.53 (s, 4H).  $^{13}\text{C}$  NMR ( $\text{DMSO-d}_6$ )  $\delta$ : 63.0, 119.8 (q,  $J = 29.7$  Hz), 123.1 (q,  $J = 271.7$  Hz), 127.1, 128.6, 130.1, 132.1, 137.3, 144.5, 151.7.  $^{19}\text{F}$  NMR ( $\text{CDCl}_3$ )  $\delta$ : -60.9.; HRMS (TOF-MS) calcd. for  $\text{C}_{29}\text{H}_{15}\text{F}_{12}\text{O}_2$  ( $\text{M-H}^+$ ): 623.0880; found 623.0882

4,4'-(cyclohexane-1,1-diyl)bis(2,6-bis(trifluoromethyl)phenol) (**5d**)

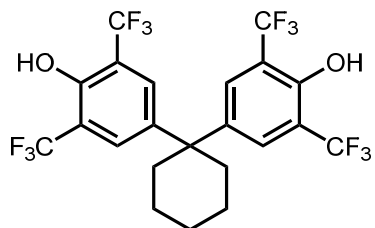

**5d**

Following the general procedure above, using bisphenol **4d** (134.2 mg, 0.5 mmol, 1.0 equiv.),  $\text{CF}_3\text{I}$  (7.0 mmol, 14.0 equiv.), and  $\text{Cs}_2\text{CO}_3$  (977.4 mg, 3.0 mmol, 6.0 equiv.) under irradiation of 30W 450 nm LED at room temperature for 24 h, yielded the product **5d** (132.4 mg, 49%); IR (neat)  $\nu$  3319, 2935, 2864, 1616, 1492, 1289, 1249, 1165, 1113  $\text{cm}^{-1}$ ;  $^1\text{H}$  NMR ( $\text{CDCl}_3$ )  $\delta$ : 1.54 (brs, 6H), 2.25 (brs, 4H), 6.00 (brs, 1H), 7.55 (s, 4H).  $^{13}\text{C}$  NMR ( $\text{DMSO-d}_6$ )  $\delta$ : 22.2, 25.2, 35.7, 45.0, 120.4 (q,  $J = 29.8$  Hz), 123.3 (q,  $J = 273.4$  Hz), 129.2, 139.2, 151.2.  $^{19}\text{F}$  NMR ( $\text{CDCl}_3$ )  $\delta$ : -60.8.; HRMS (TOF-MS) calcd. for  $\text{C}_{22}\text{H}_{15}\text{F}_{12}\text{O}_2$  ( $\text{M-H}^+$ ): 539.0880; found 539.0883

4,4'-(perfluoropropane-2,2-diyl)bis(2,6-bis(trifluoromethyl)phenol) (**5e**)

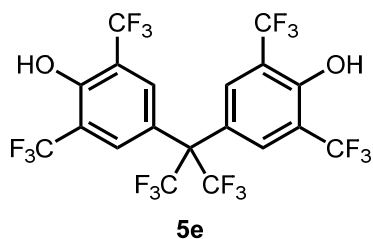

Following the general procedure above, using bisphenol **4e** (168.1 mg, 0.5 mmol, 1.0 equiv.),  $\text{CF}_3\text{I}$  (7.0 mmol, 14.0 equiv.), and  $\text{Cs}_2\text{CO}_3$  (977.4 mg, 3.0 mmol, 6.0 equiv.) under irradiation of 18W 450 nm LED at room temperature for 24 h, yielded the product **5e** (170.3 mg, 56%); IR (neat)  $\nu$  3620, 1497, 1278, 1259, 1100, 904  $\text{cm}^{-1}$ ;  $^1\text{H}$  NMR ( $\text{CDCl}_3$ )  $\delta$ : 6.44 (brs, 2H), 7.69 (s, 4H).  $^{13}\text{C}$  NMR ( $\text{DMSO-d}_6$ )  $\delta$ : 62.8 (quint,  $J = 26.5$  Hz), 120.6 (q,  $J = 30.5$  Hz), 121.7, 122.7 (q,  $J = 272.7$  Hz), 123.3 (q,  $J = 287.5$  Hz), 131.7, 155.0.  $^{19}\text{F}$  NMR ( $\text{CDCl}_3$ )  $\delta$ : -61.2, -64.1.; HRMS (TOF-MS) calcd. for  $\text{C}_{19}\text{H}_5\text{F}_{18}\text{O}_2$  ( $\text{M-H}^+$ ): 607.0002; found 607.0003

4,4'-oxybis(2,6-bis(trifluoromethyl)phenol) (**5f**)

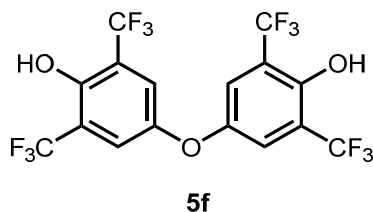

Following the general procedure above, using bisphenol **4f** (101.1 mg, 0.5 mmol, 1.0 equiv.),  $\text{CF}_3\text{I}$  (10.0 mmol, 20.0 equiv.), and  $\text{Cs}_2\text{CO}_3$  (1466.1 mg, 4.5 mmol, 9.0 equiv.) under irradiation of 30W 450 nm LED at room temperature for 24 h, yielded the product **5f** (71.1 mg, 30%); IR (neat)  $\nu$  3604, 3098, 1616, 1478, 1353, 1258, 1101  $\text{cm}^{-1}$ ;  $^1\text{H}$  NMR ( $\text{CDCl}_3$ )  $\delta$ : 5.95 (brs, 2H), 7.37 (s, 4H).  $^{13}\text{C}$  NMR ( $\text{DMSO-d}_6$ )  $\delta$ : 122.1 (q,  $J = 29.7$  Hz), 122.8 (q,  $J = 273.1$  Hz), 148.9, 149.4.  $^{19}\text{F}$  NMR ( $\text{CDCl}_3$ )  $\delta$ : -61.3.; HRMS (TOF-MS) calcd. for  $\text{C}_{16}\text{H}_5\text{F}_{12}\text{O}_3$  ( $\text{M-H}^+$ ): 473.0047; found 473.0049

4,4'-thiobis(2,6-bis(trifluoromethyl)phenol) (**5g**)

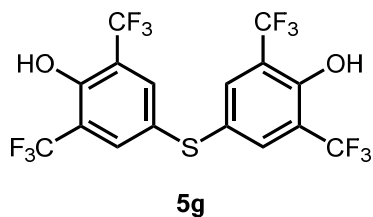

Following the general procedure above, using bisphenol **4g** (109.1 mg, 0.5 mmol, 1.0 equiv.),  $\text{CF}_3\text{I}$  (7.0 mmol, 14.0 equiv.), and  $\text{Cs}_2\text{CO}_3$  (977.4 mg, 3.0 mmol, 6.0 equiv.) under irradiation of 30W 450

nm LED at room temperature for 24 h, yielded the product **5g** (68.6 mg, 28%); IR (neat)  $\nu$  3552, 3098, 1605, 1474, 1344, 1294, 1253, 1094  $\text{cm}^{-1}$ ;  $^1\text{H}$  NMR ( $\text{CDCl}_3$ )  $\delta$ : 6.18 (brs, 2H), 7.72 (s, 4H).  $^{13}\text{C}$  NMR ( $\text{DMSO-d}_6$ )  $\delta$ : 121.8 (q,  $J = 30.4$  Hz), 123.2 (q,  $J = 273.6$  Hz), 125.9, 134.6, 153.7;  $^{19}\text{F}$  NMR ( $\text{CDCl}_3$ )  $\delta$ : -61.2.; HRMS (TOF-MS) calcd. for  $\text{C}_{16}\text{H}_5\text{F}_{12}\text{O}_2\text{S}$  ( $\text{M-H}^+$ ): 488.9819; found 488.9821

4,4'-(1,4-phenylenebis(propane-2,2-diyl))bis(2,6-bis(trifluoromethyl)phenol) (**5h**)

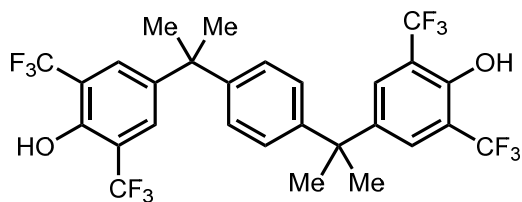

**5h**

Following the general procedure above, using bisphenol **4h** (173.2 mg, 0.5 mmol, 1.0 equiv.),  $\text{CF}_3\text{I}$  (7.0 mmol, 14.0 equiv.), and  $\text{Cs}_2\text{CO}_3$  (977.4 mg, 3.0 mmol, 6.0 equiv.) under irradiation of 30W 450 nm LED at room temperature for 24 h, yielded the product **5h** (157.7 mg, 51%); IR (neat)  $\nu$  3625, 2974, 1710, 1615, 1490, 1364, 1260, 1098  $\text{cm}^{-1}$ ;  $^1\text{H}$  NMR ( $\text{CDCl}_3$ )  $\delta$ : 1.68 (s, 12H), 5.92 (brs, 2H), 7.11 (s, 4H), 7.52 (s, 4H).  $^{13}\text{C}$  NMR ( $\text{DMSO-d}_6$ )  $\delta$ : 29.9, 41.8, 120.0 (q,  $J = 29.4$  Hz), 123 (q,  $J = 272.8$  Hz), 126.5, 128.5, 142.8, 146.6, 150.9.  $^{19}\text{F}$  NMR ( $\text{CDCl}_3$ )  $\delta$ : -61.6.; HRMS (TOF-MS) calcd. for  $\text{C}_{28}\text{H}_{21}\text{F}_{12}\text{O}_2$  ( $\text{M-H}^+$ ): 617.1350; found 617.1349

3,3-bis(4-hydroxy-3,5-bis(trifluoromethyl)phenyl)isobenzofuran-1(3H)-one (**5i**)

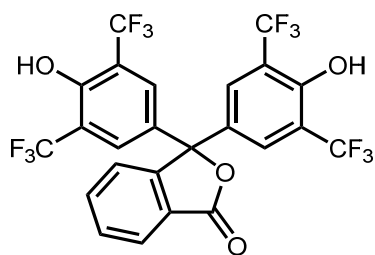

**5i**

Following the general procedure above, using bisphenol **4i** (159.2 mg, 0.5 mmol, 1.0 equiv.),  $\text{CF}_3\text{I}$  (7.0 mmol, 14.0 equiv.), and  $\text{Cs}_2\text{CO}_3$  (977.4 mg, 3.0 mmol, 6.0 equiv.) under irradiation of 18W 450 nm LED at room temperature for 24 h, yielded the product **5i** (156.4 mg, 53%); IR (neat)  $\nu$  3585, 3236, 1750, 1488, 1366, 1261, 1108  $\text{cm}^{-1}$ ;  $^1\text{H}$  NMR ( $\text{DMSO-d}_6$ )  $\delta$ : 7.69 (t,  $J = 7.3$  Hz, 1H), 7.73 (s, 4H), 7.89-7.93 (m, 2H), 8.14 (d,  $J = 7.9$  Hz, 1H).  $^{13}\text{C}$  NMR ( $\text{DMSO-d}_6$ )  $\delta$ : 88.8, 120.6 (q,  $J = 30.4$  Hz), 123.0 (q,  $J = 274.3$  Hz), 124.5, 124.6, 126.3, 129.5 (d,  $J = 4.6$  Hz), 130.7, 131.5, 135.7, 149.9, 154.1, 168.1.  $^{19}\text{F}$  NMR ( $\text{CDCl}_3$ )  $\delta$ : -61.1.; HRMS (TOF-MS) calcd. for  $\text{C}_{24}\text{H}_9\text{F}_{12}\text{O}_4$  ( $\text{M-H}^+$ ): 589.0309; found 589.0309

## References

- (1) Umemoto, T.; Ando, A. *Bull. Chem. Soc. Jpn*, **1986**, *59*, 447–452.

<sup>1</sup>H NMR (500 MHz, CDCl<sub>3</sub>)

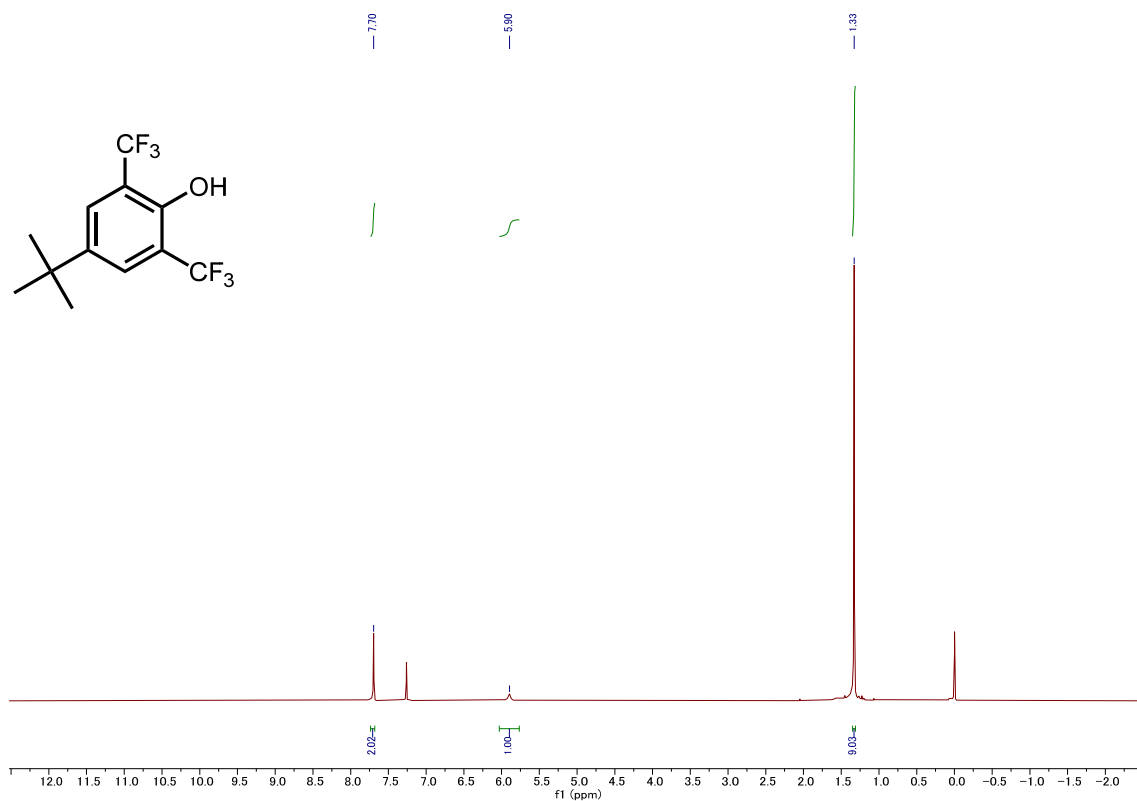

<sup>13</sup>C NMR (125 MHz, CDCl<sub>3</sub>)

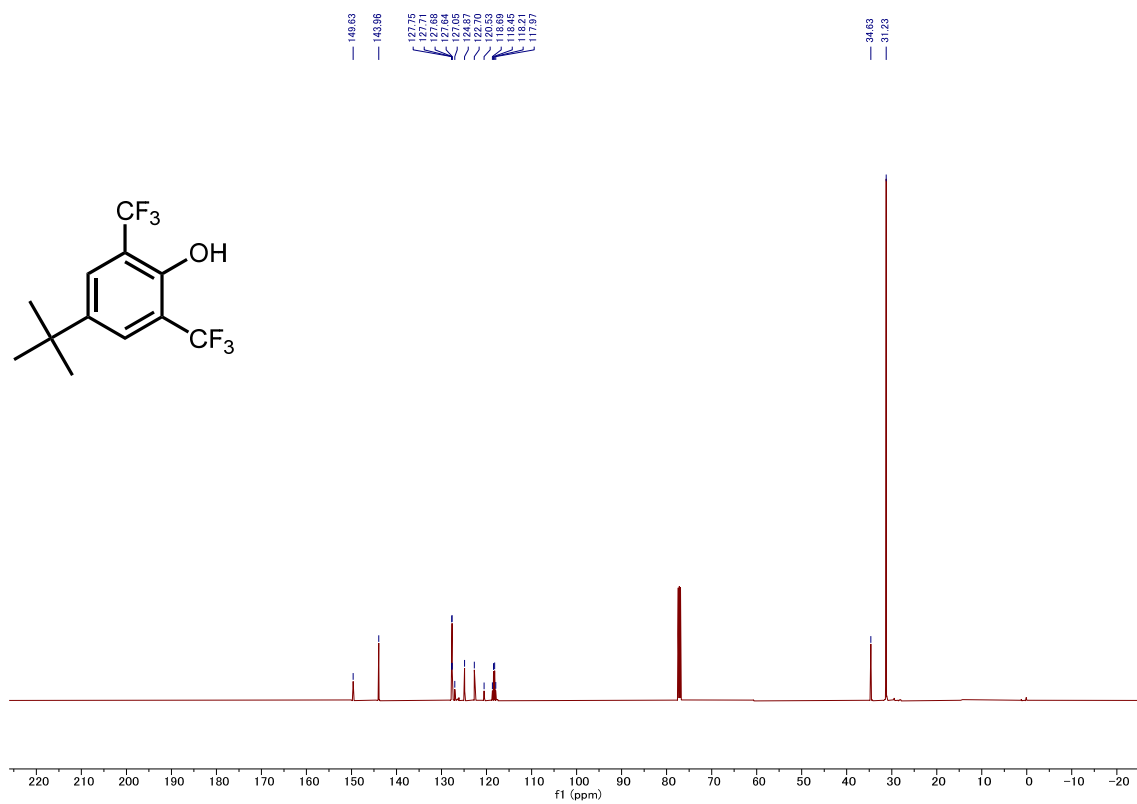

$^{19}\text{F}$  NMR (471 MHz,  $\text{CDCl}_3$ )

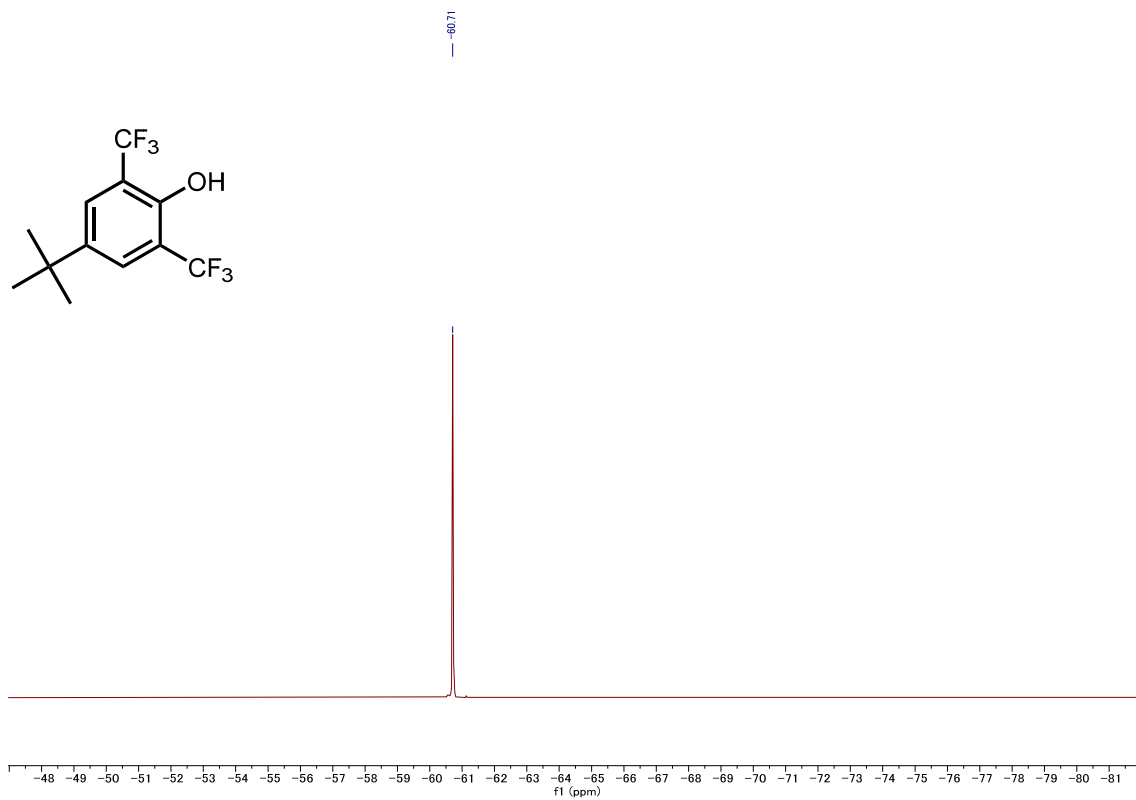

<sup>1</sup>H NMR (500 MHz, CDCl<sub>3</sub>)

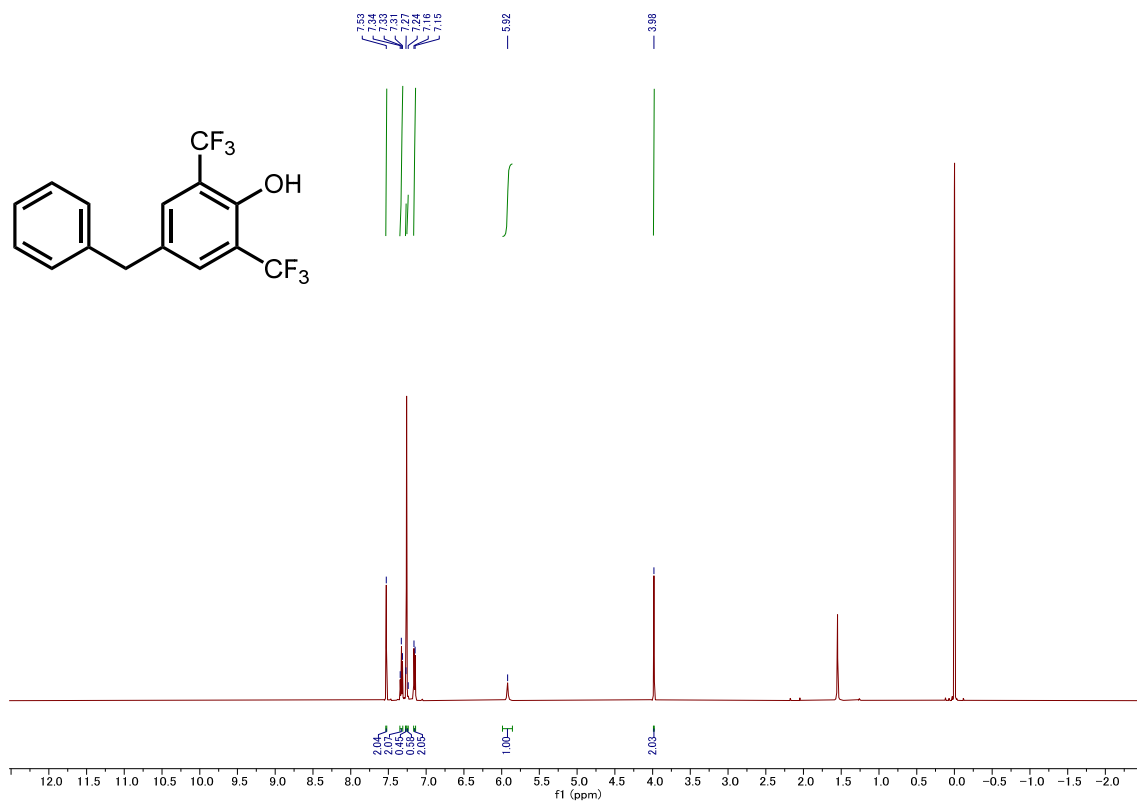

<sup>13</sup>C NMR (125 MHz, CDCl<sub>3</sub>)

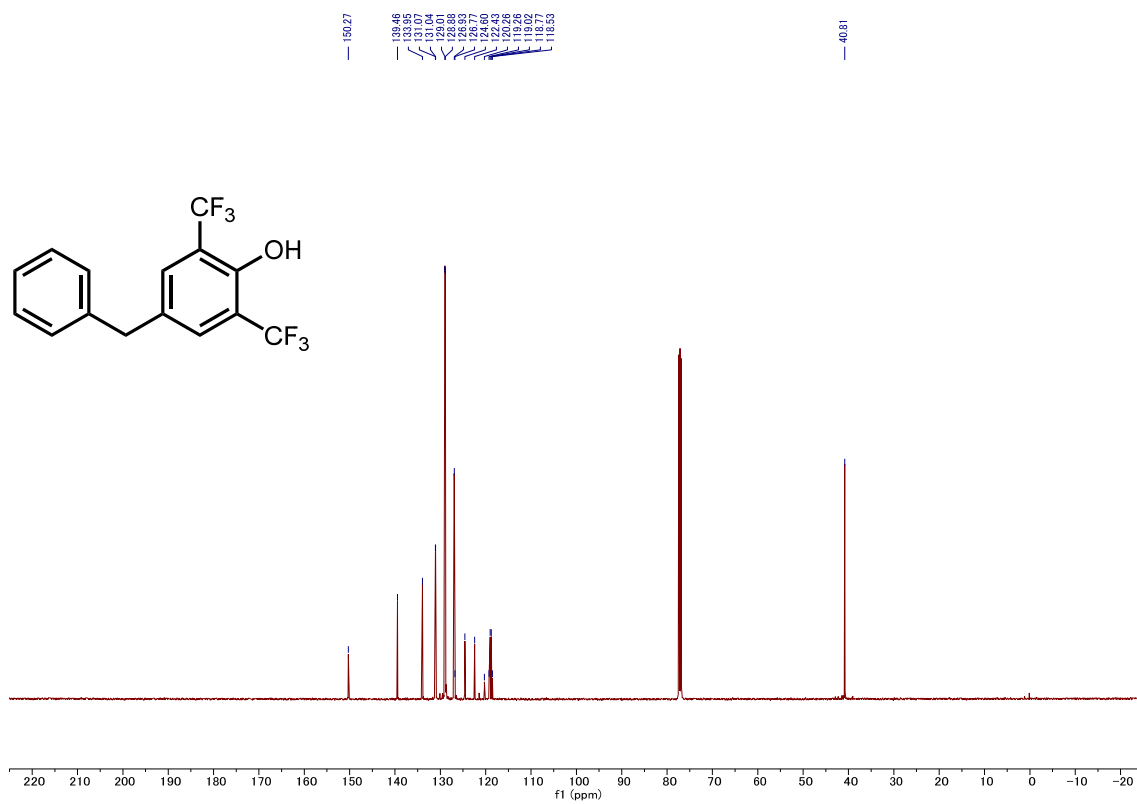

$^{19}\text{F}$  NMR (471 MHz,  $\text{CDCl}_3$ )

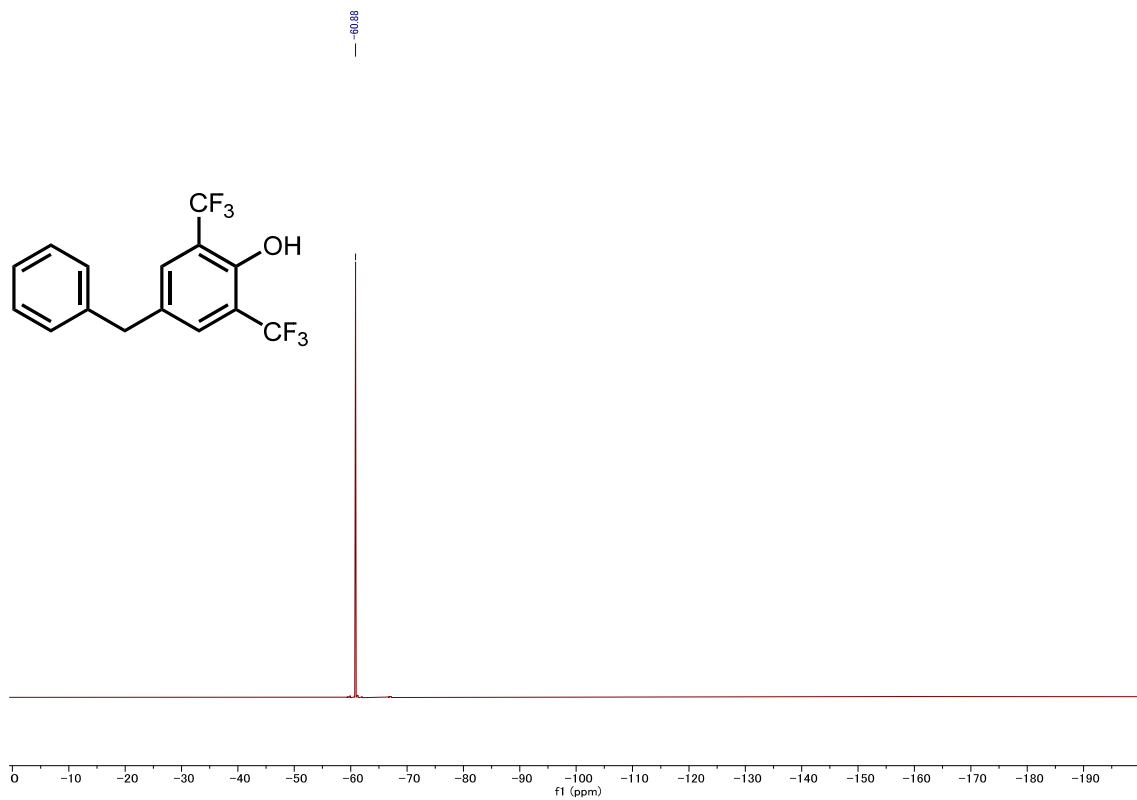



$^1\text{H}$  NMR (500 MHz,  $\text{CDCl}_3$ )

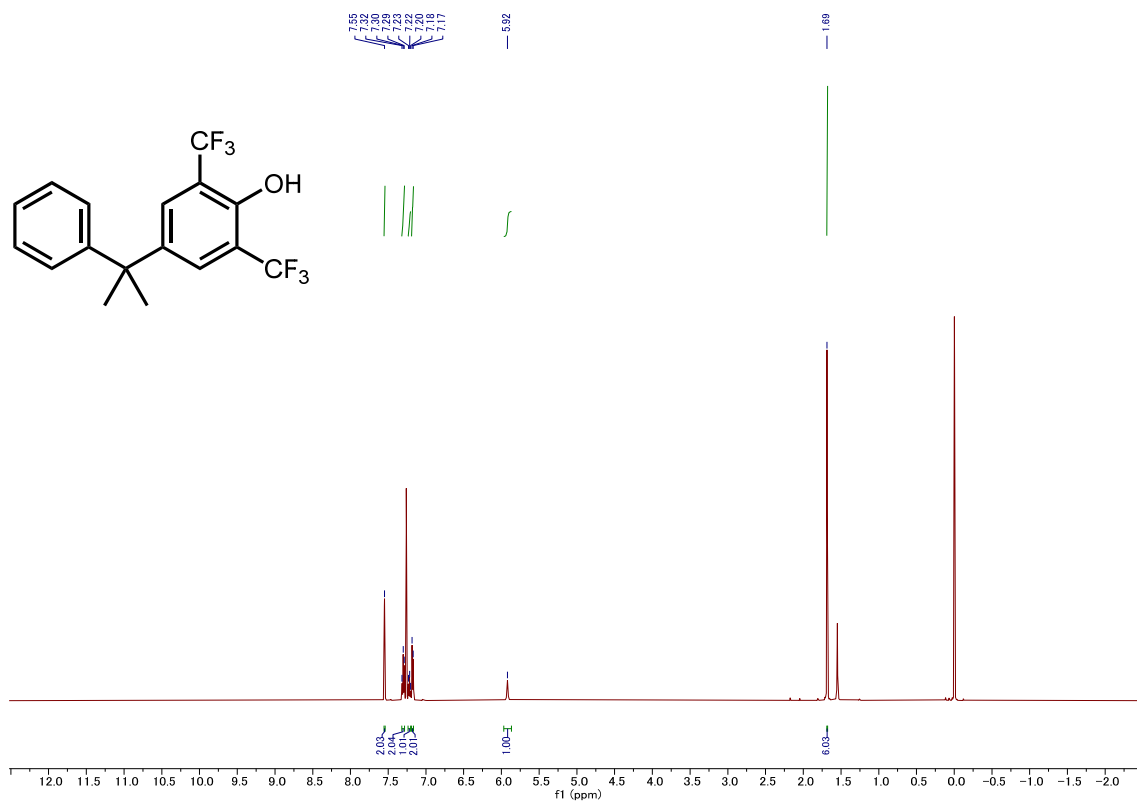

$^{13}\text{C}$  NMR (125 MHz,  $\text{CDCl}_3$ )

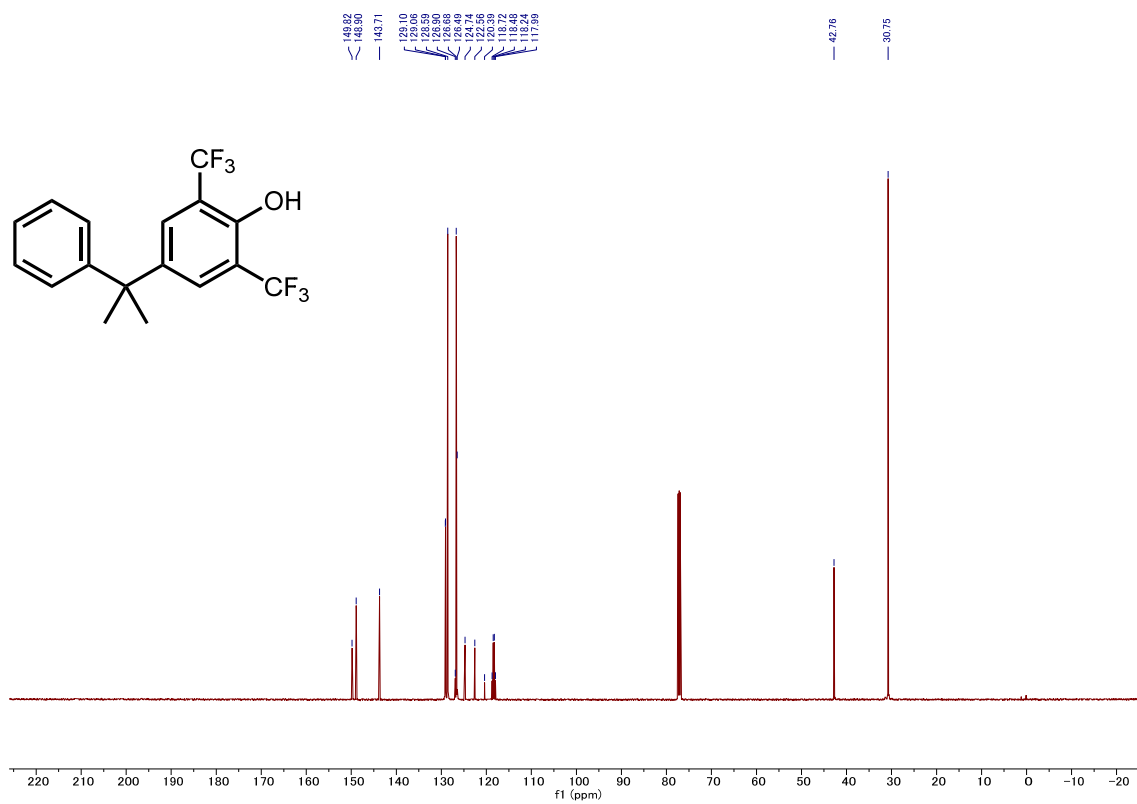

$^{19}\text{F}$  NMR (471 MHz,  $\text{CDCl}_3$ )

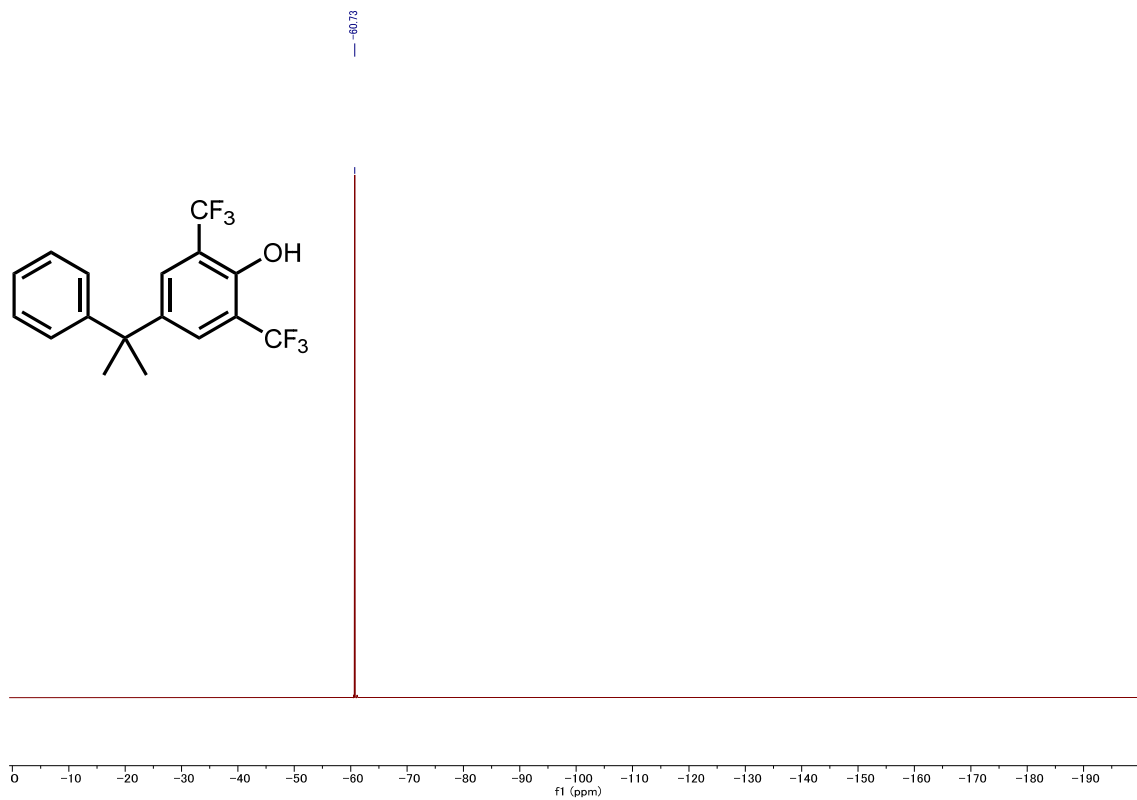

<sup>1</sup>H NMR (500 MHz, CDCl<sub>3</sub>)

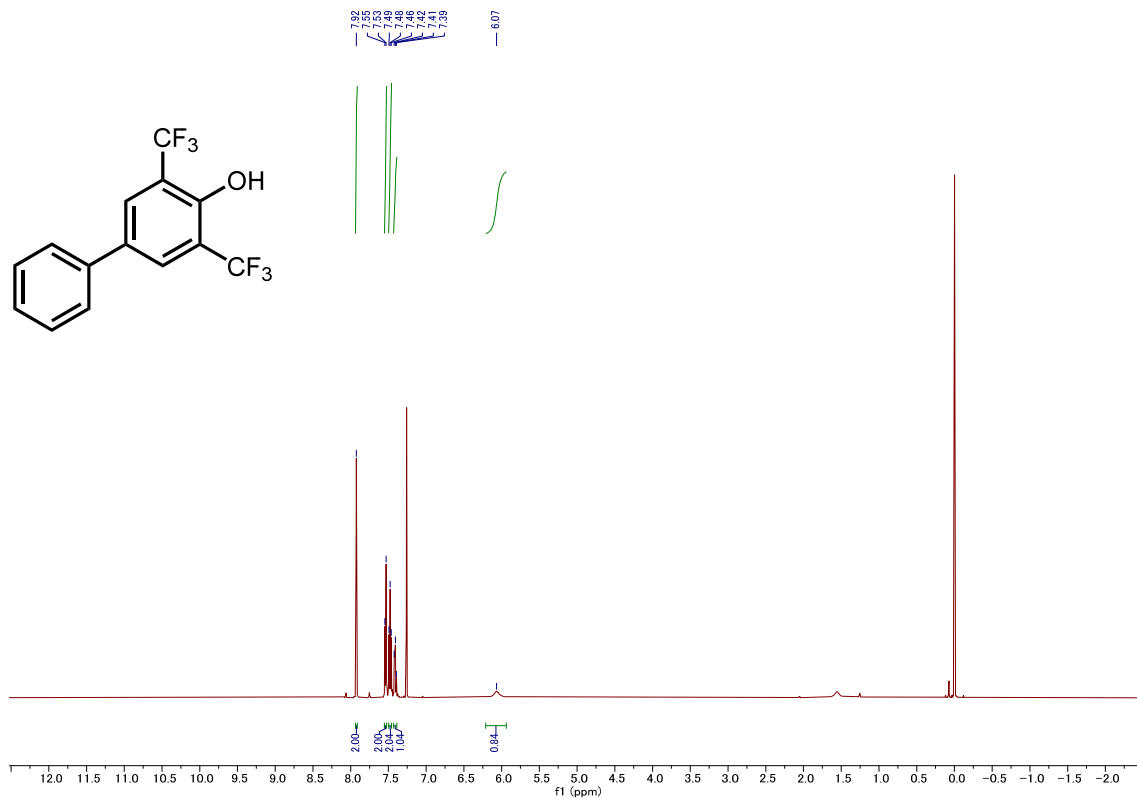

<sup>13</sup>C NMR (125 MHz, CDCl<sub>3</sub>)

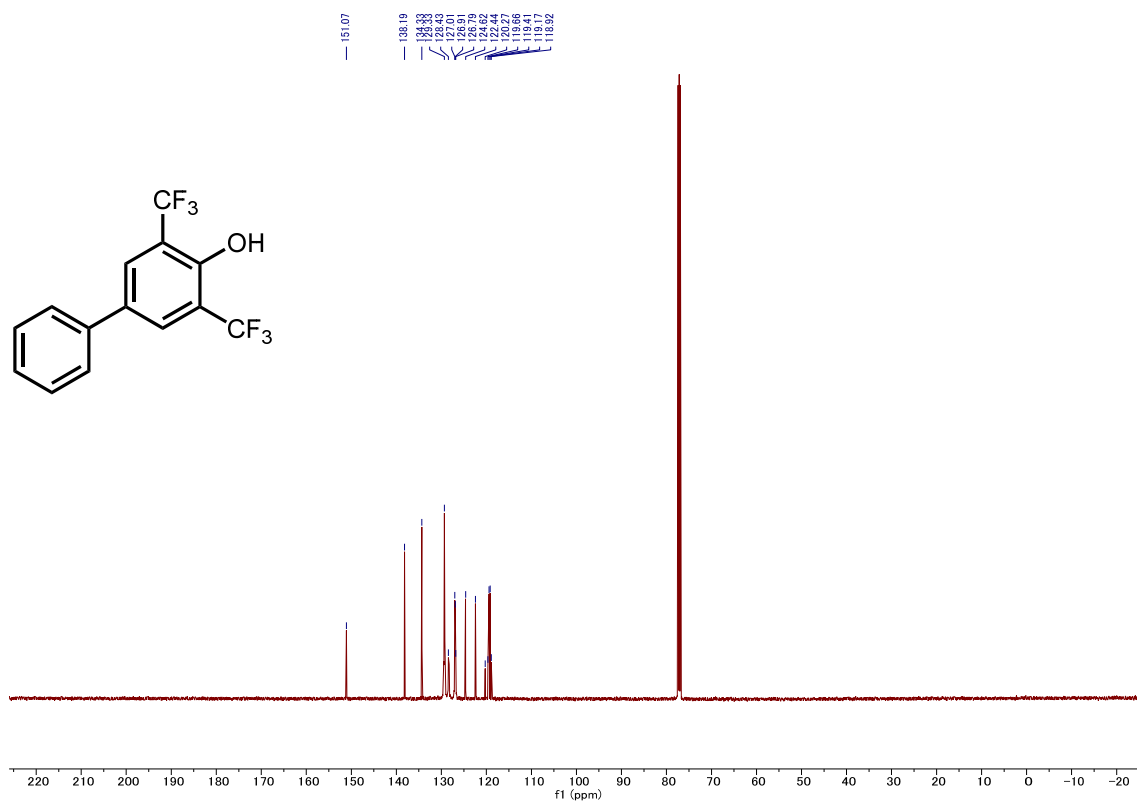

$^{19}\text{F}$  NMR (471 MHz,  $\text{CDCl}_3$ )

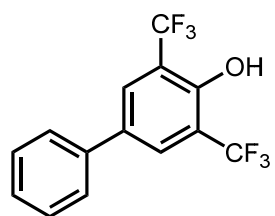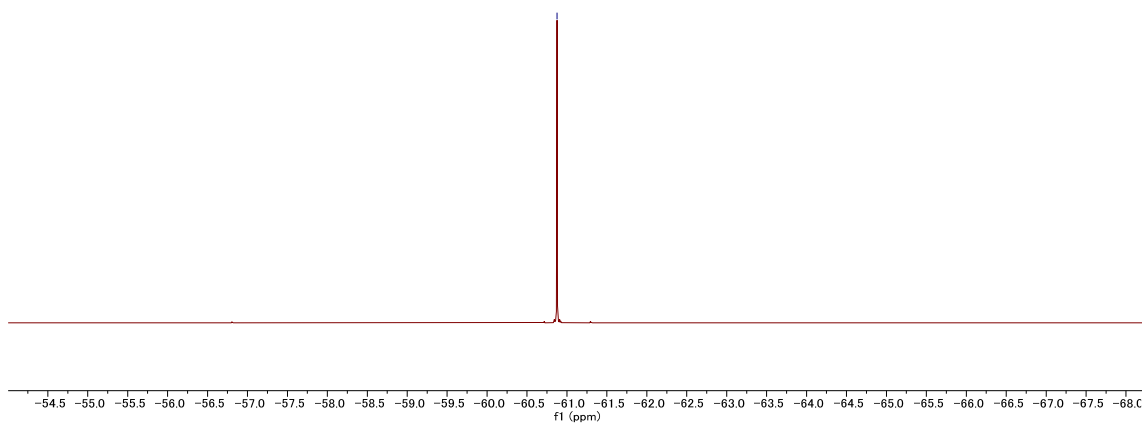

$^1\text{H}$  NMR (500 MHz,  $\text{CDCl}_3$ )

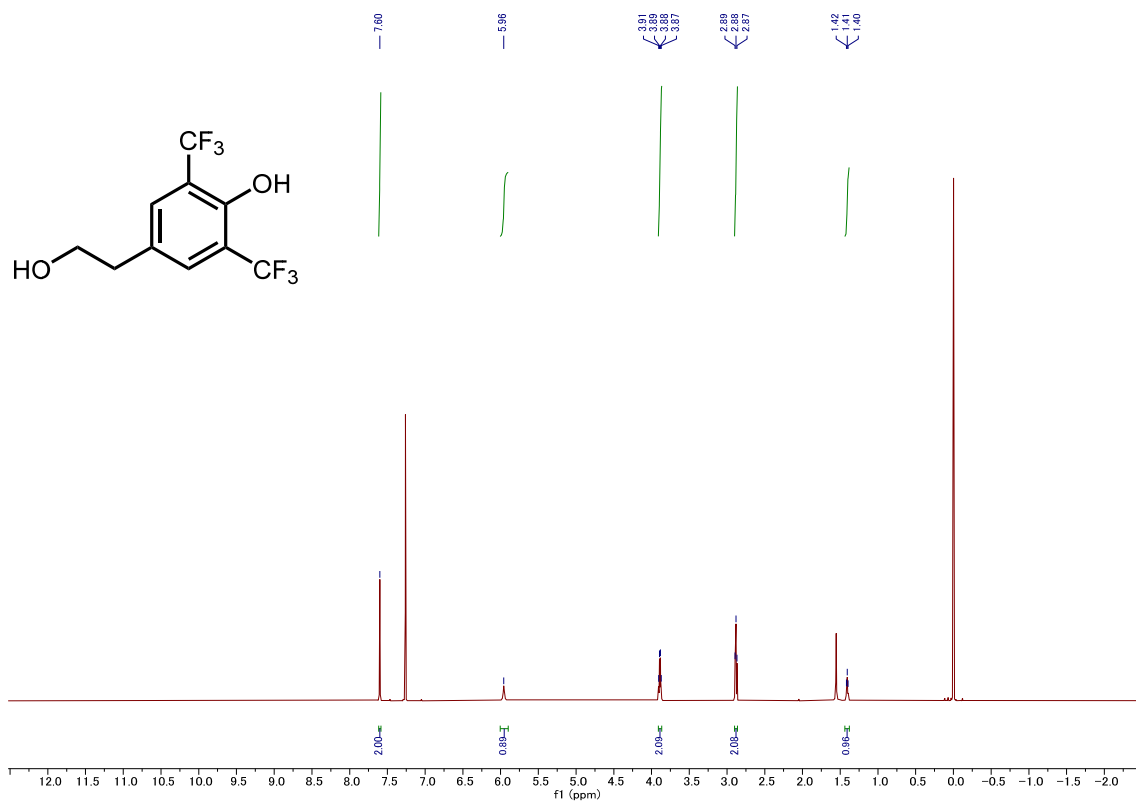

$^{13}\text{C}$  NMR (125 MHz,  $\text{CDCl}_3$ )

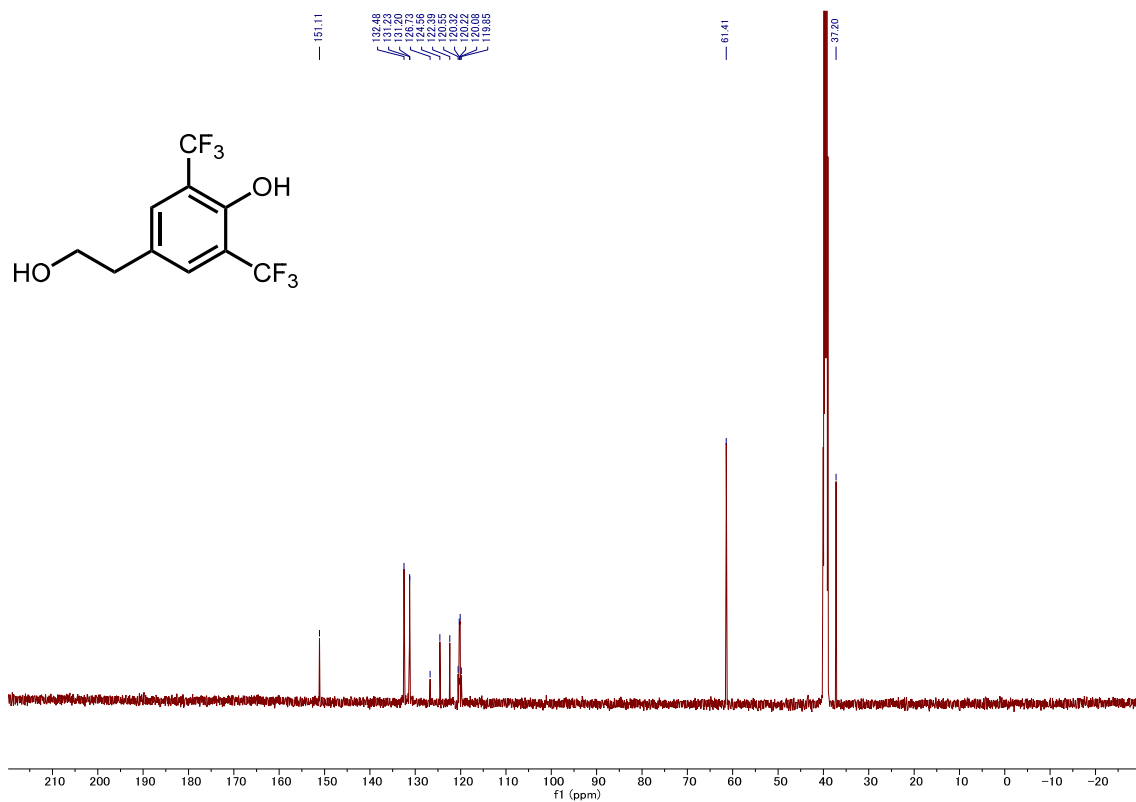

$^{19}\text{F}$  NMR (471 MHz, d-DMSO)

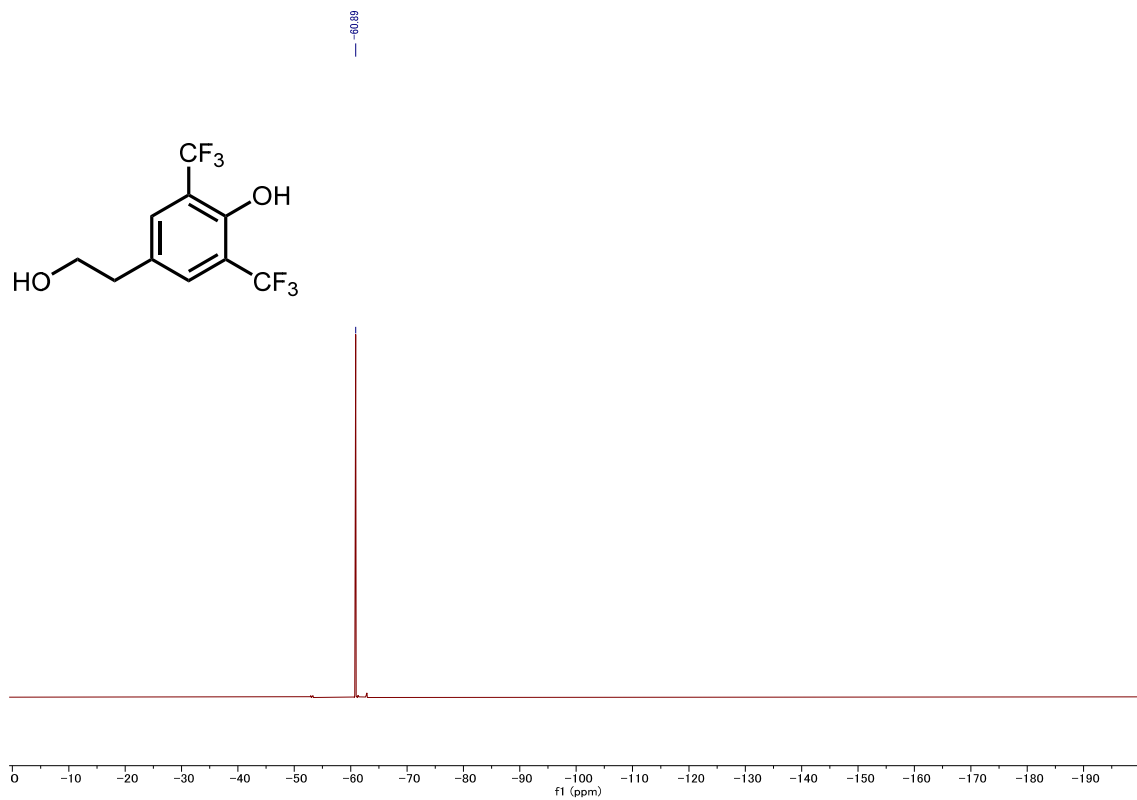

$^1\text{H}$  NMR (500 MHz,  $\text{CDCl}_3$ )

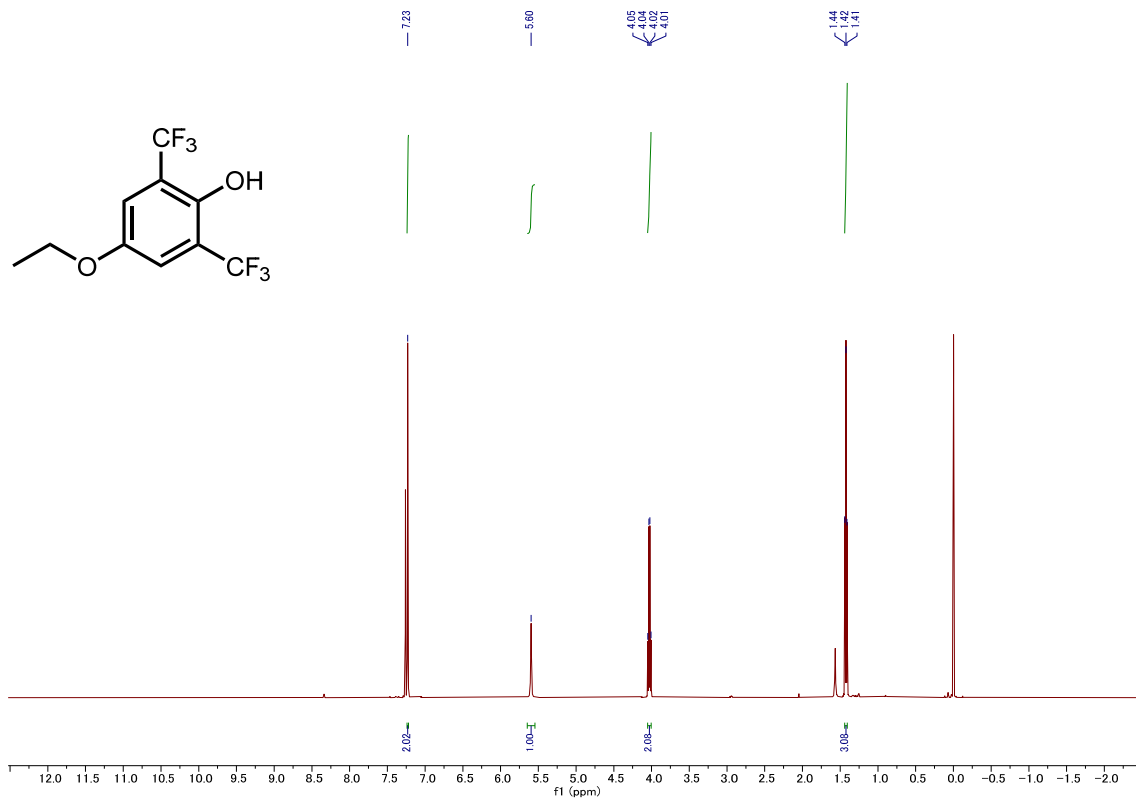

$^{13}\text{C}$  NMR (125 MHz,  $\text{CDCl}_3$ )

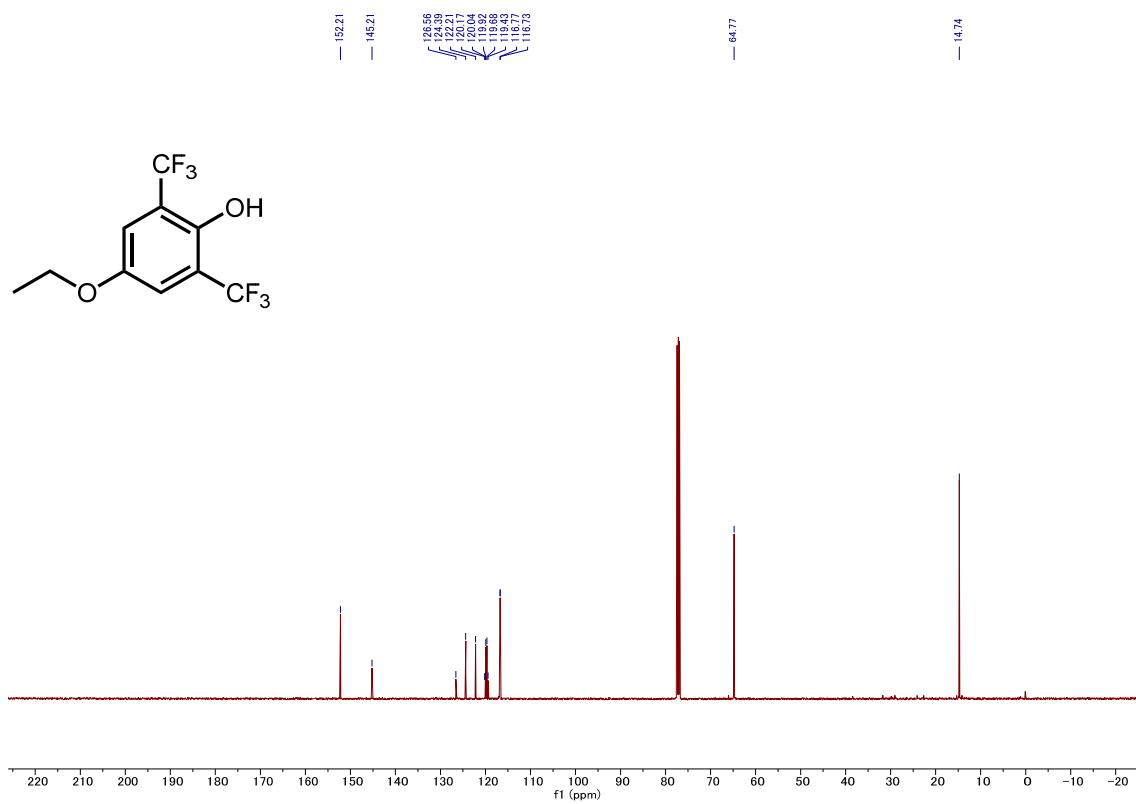

$^{19}\text{F}$  NMR (471 MHz,  $\text{CDCl}_3$ )

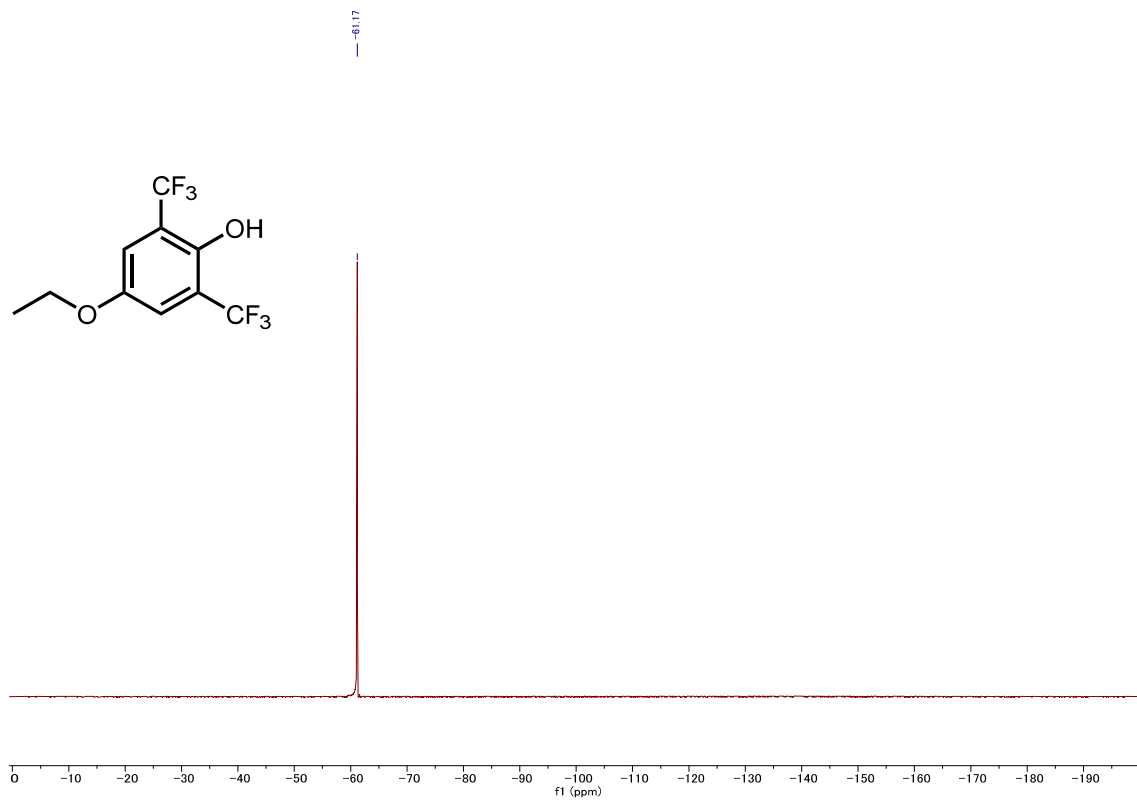



$^1\text{H}$  NMR (500 MHz,  $\text{CDCl}_3$ )

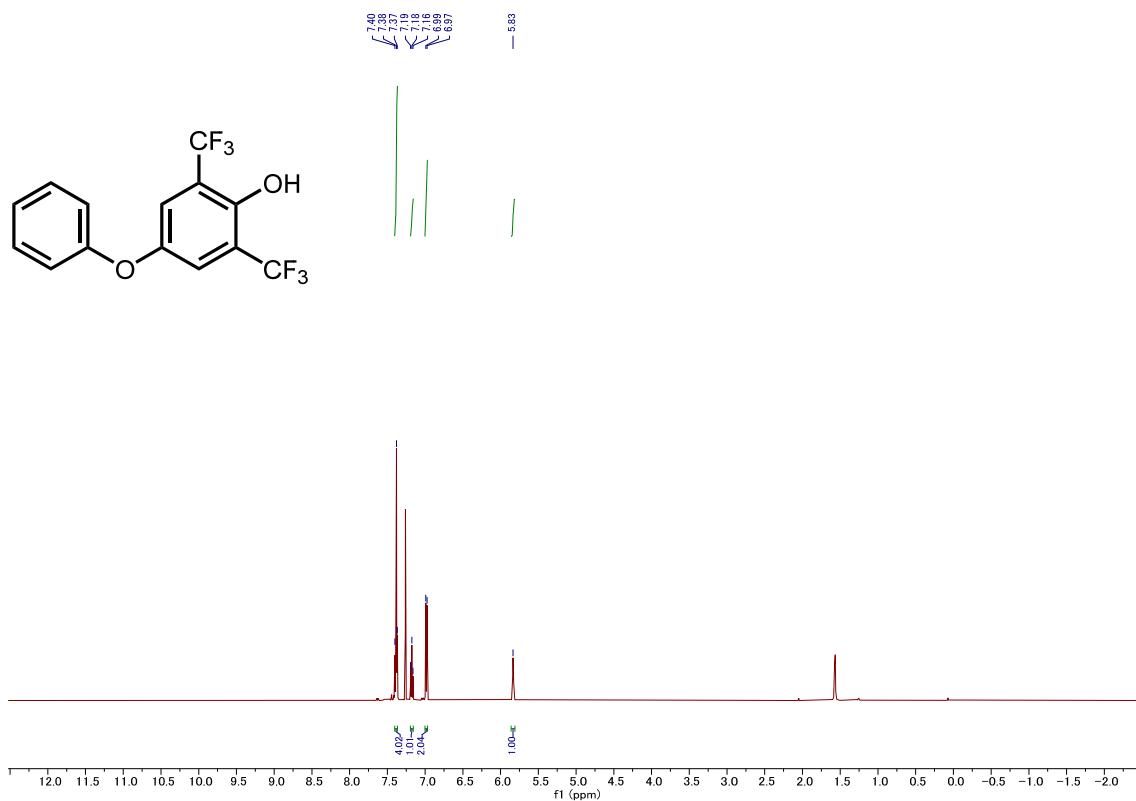

$^{13}\text{C}$  NMR (125 MHz,  $\text{CDCl}_3$ )

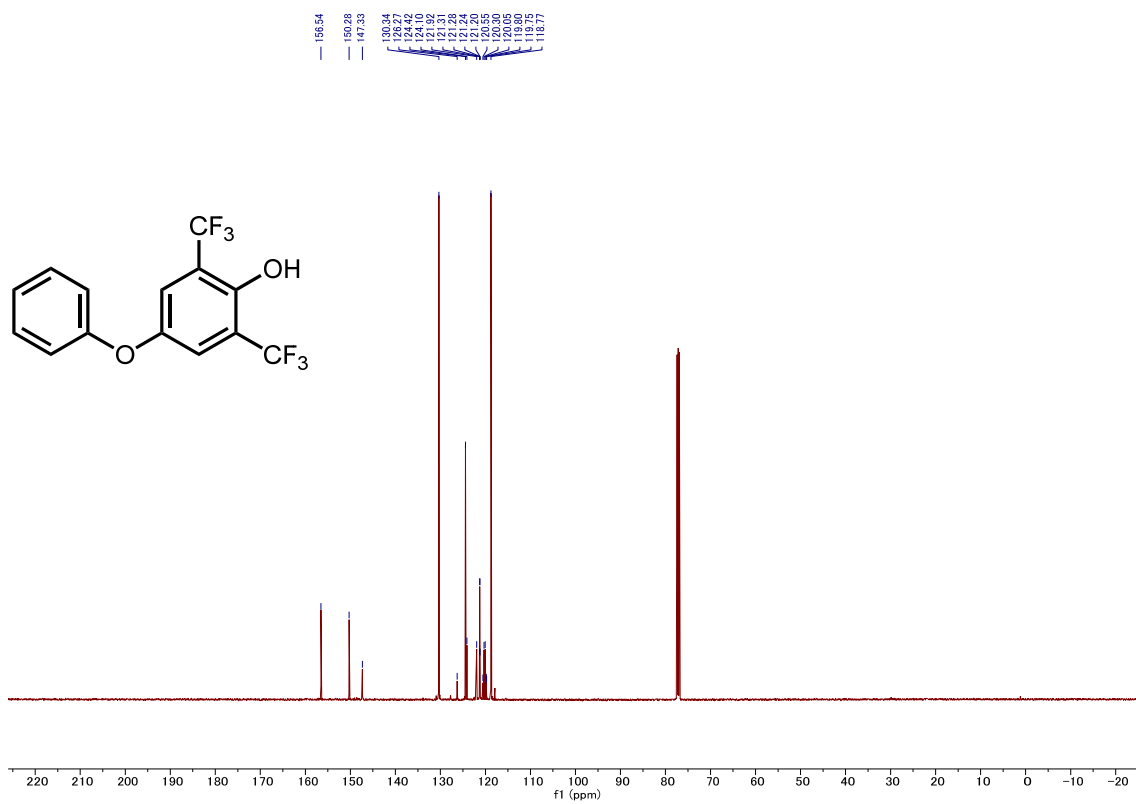

$^{19}\text{F}$  NMR (471 MHz,  $\text{CDCl}_3$ )

-61.24

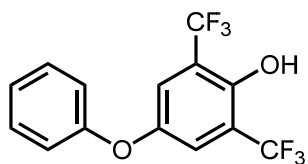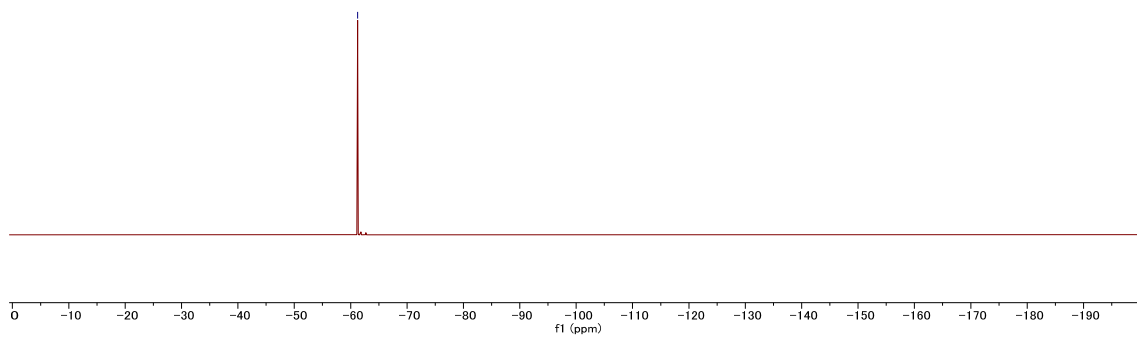

$^1\text{H}$  NMR (500 MHz,  $\text{CDCl}_3$ )

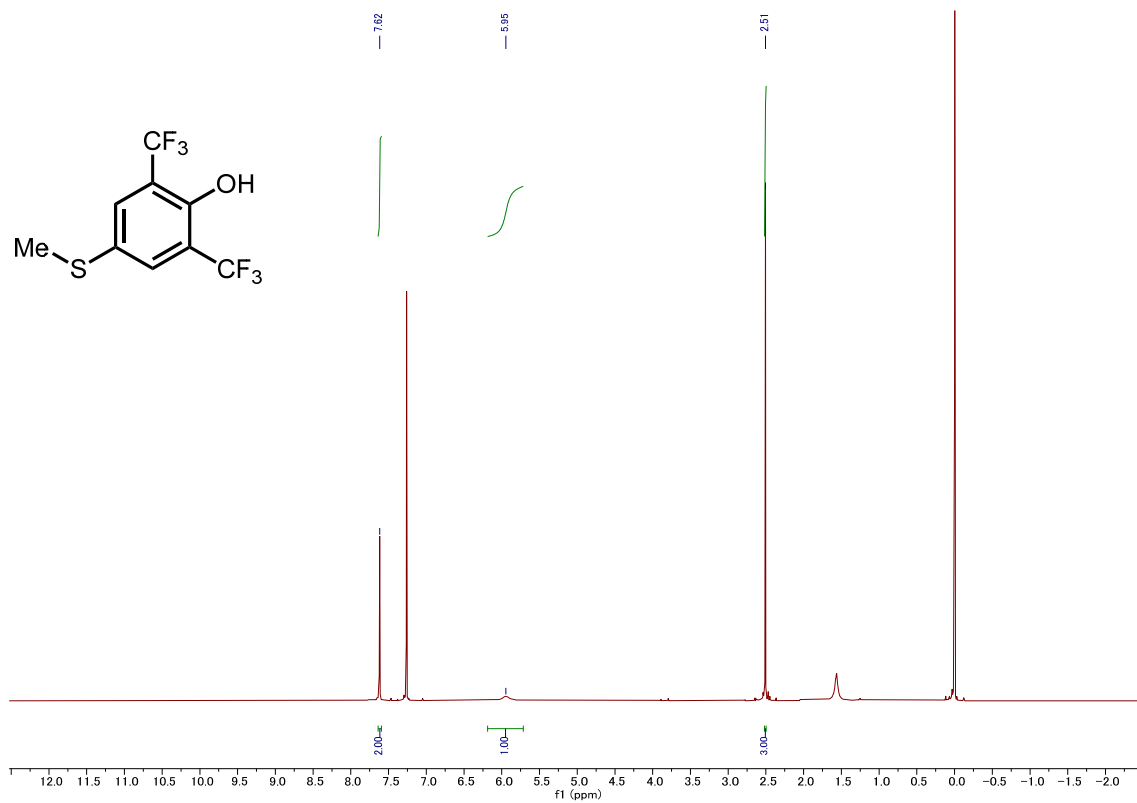

$^{13}\text{C}$  NMR (125 MHz,  $\text{CDCl}_3$ )

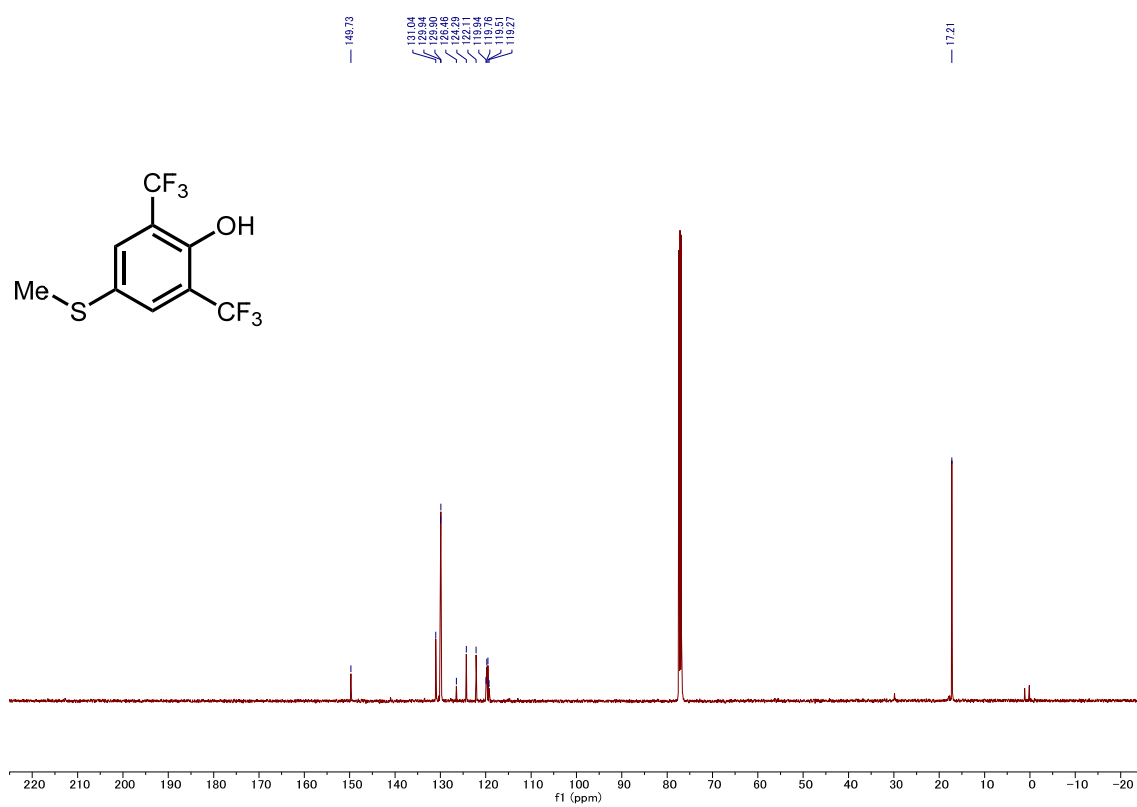

$^{19}\text{F}$  NMR (471 MHz,  $\text{CDCl}_3$ )

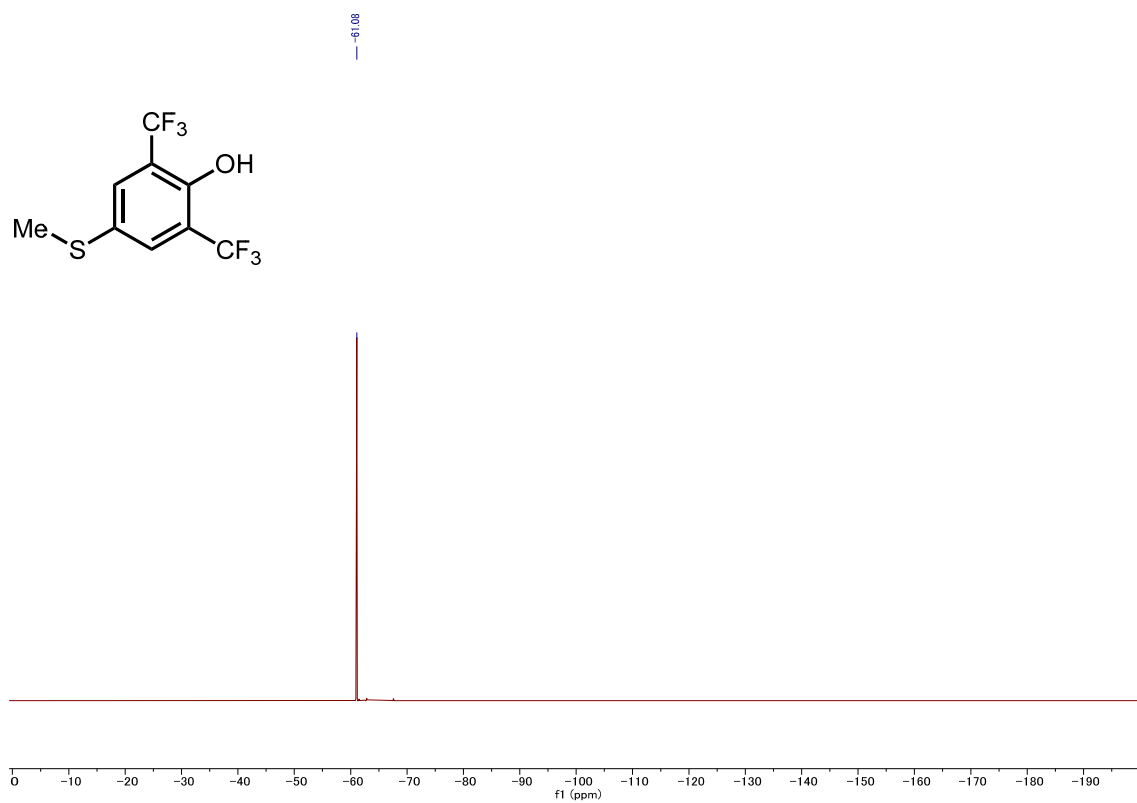

$^1\text{H}$  NMR (500 MHz,  $\text{CDCl}_3$ )

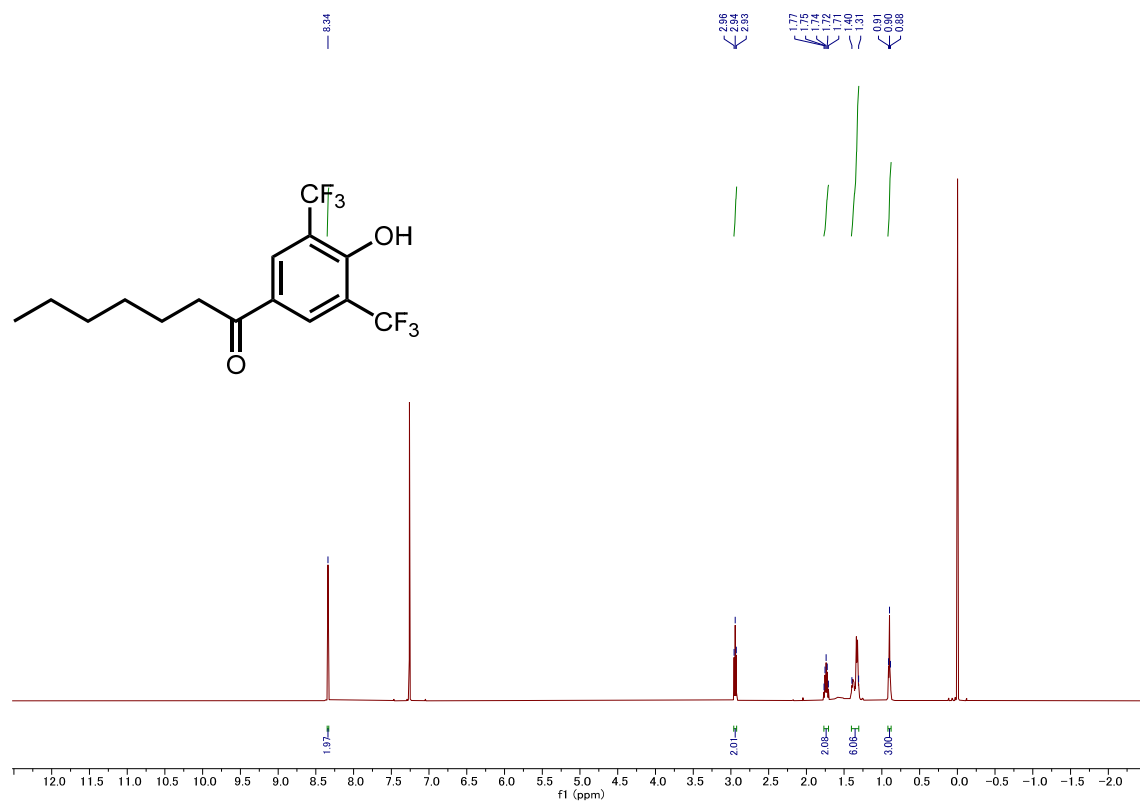

$^{13}\text{C}$  NMR (125 MHz,  $\text{CDCl}_3$ )

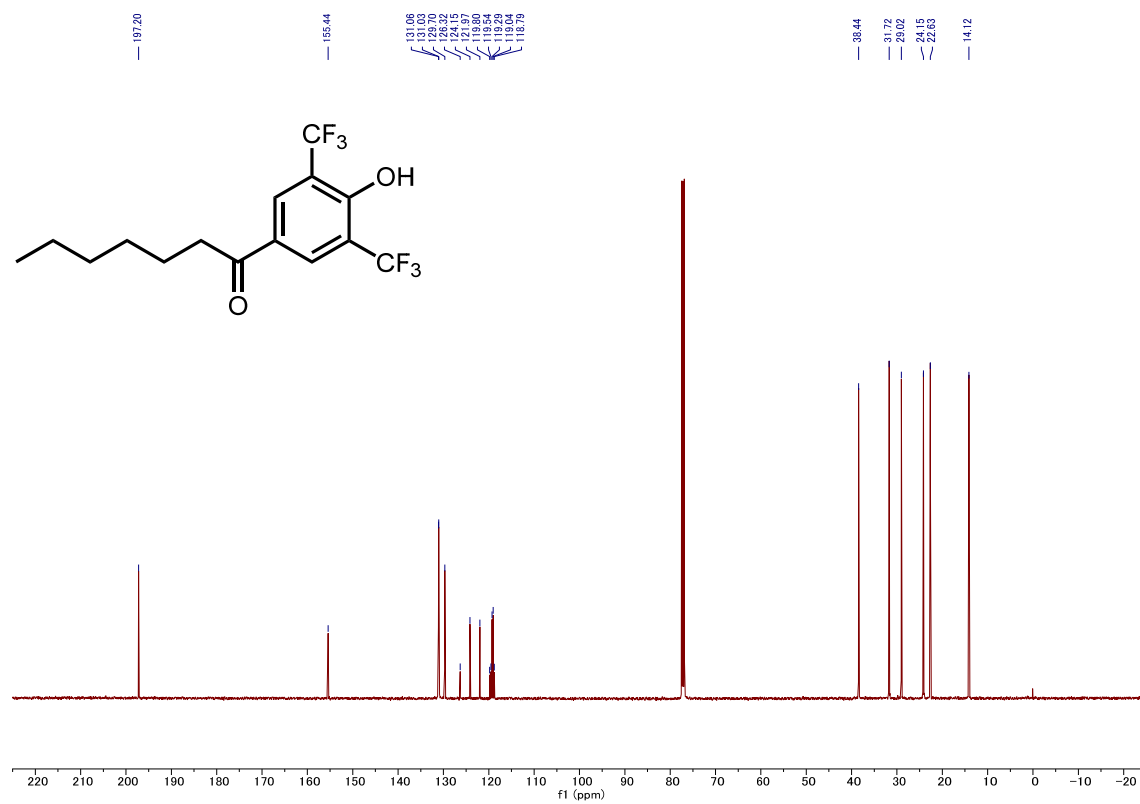

$^{19}\text{F}$  NMR (471 MHz,  $\text{CDCl}_3$ )

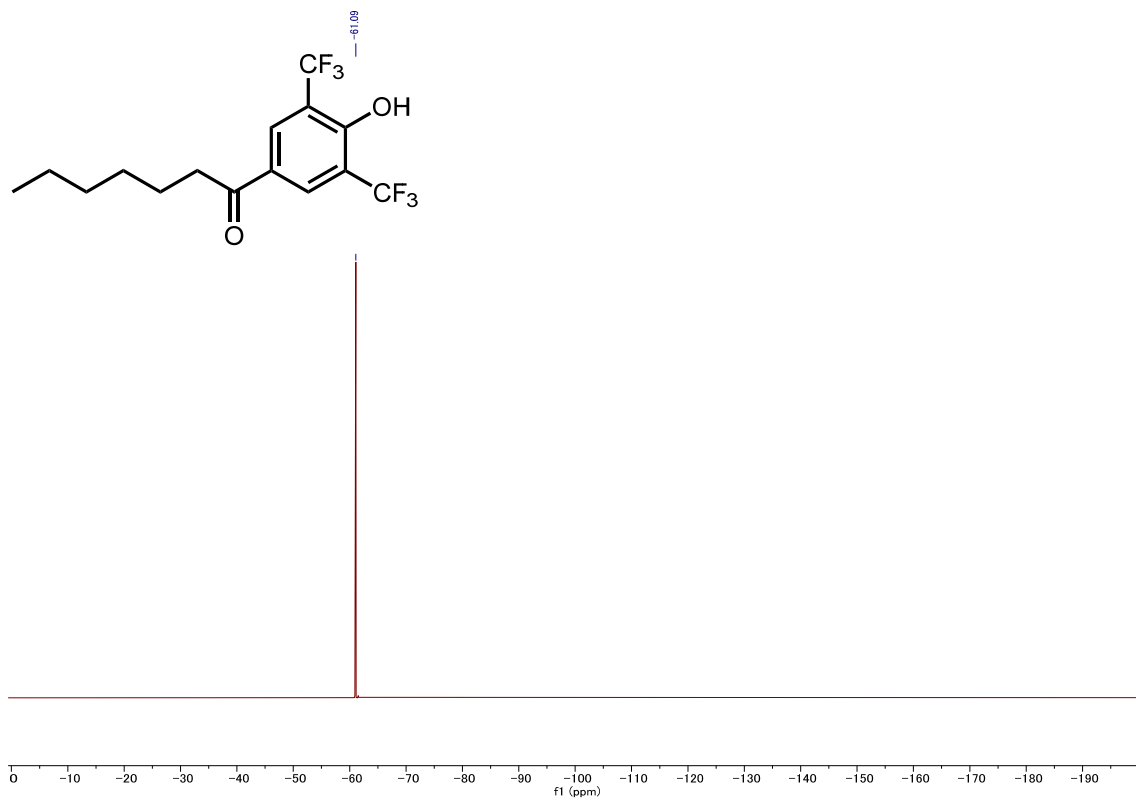

$^1\text{H}$  NMR (500 MHz,  $\text{CDCl}_3$ )

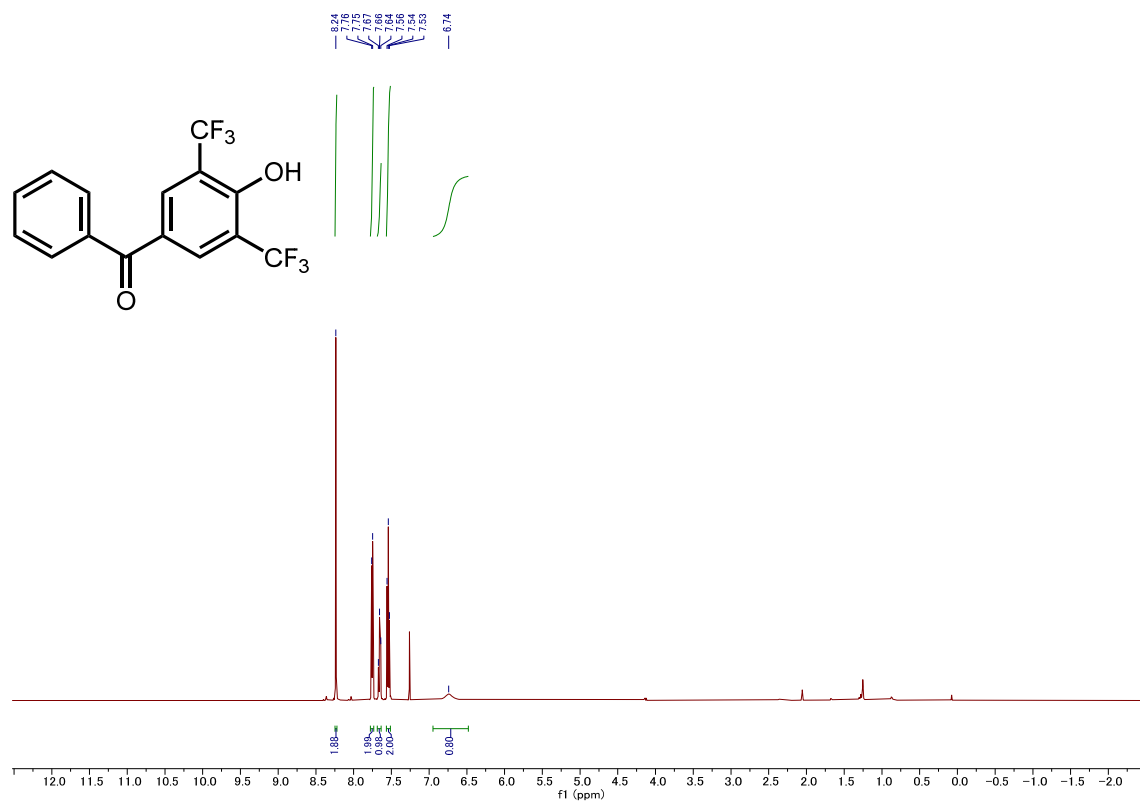

$^{13}\text{C}$  NMR (125 MHz,  $\text{CDCl}_3$ )

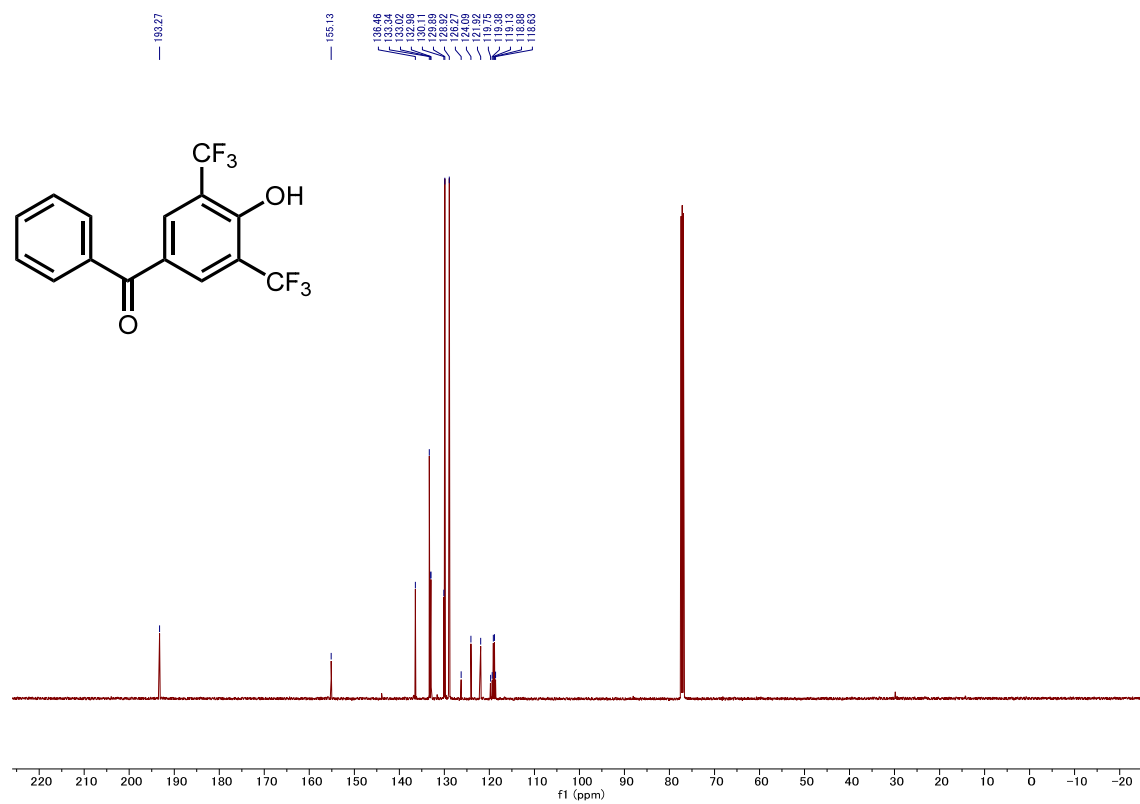

$^{19}\text{F}$  NMR (471 MHz,  $\text{CDCl}_3$ )

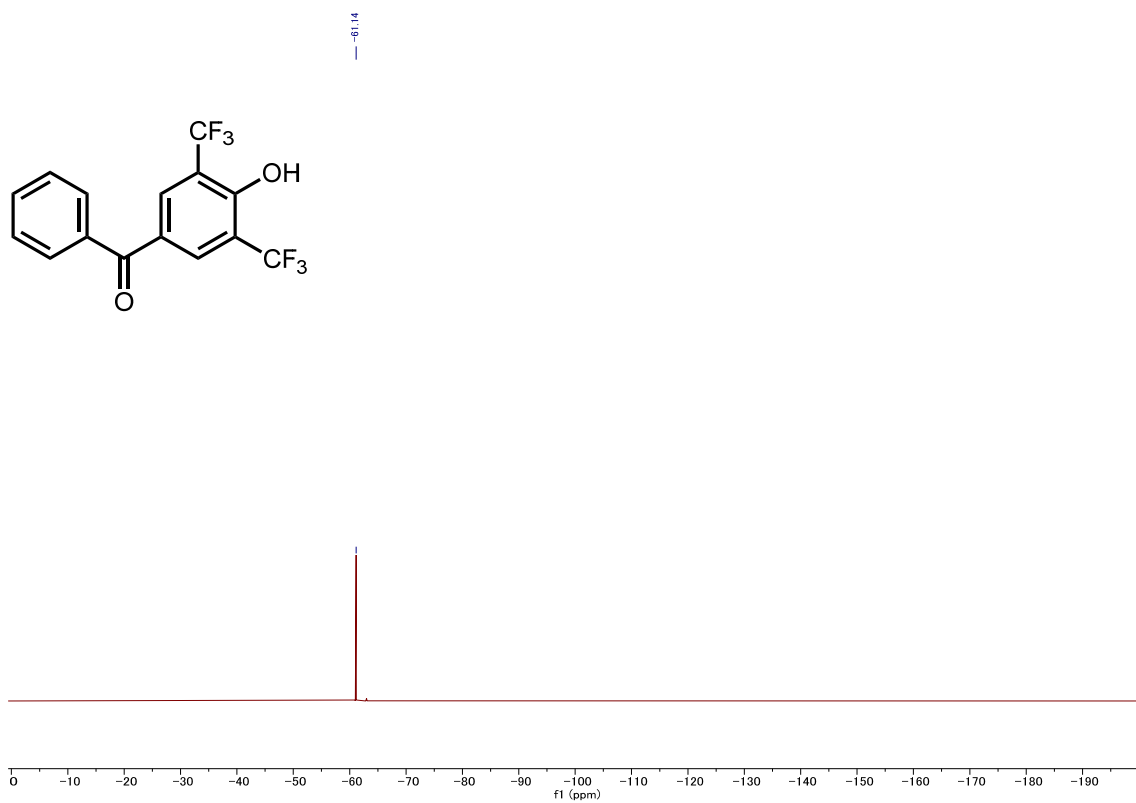



$^1\text{H}$  NMR (500 MHz,  $\text{CDCl}_3$ )

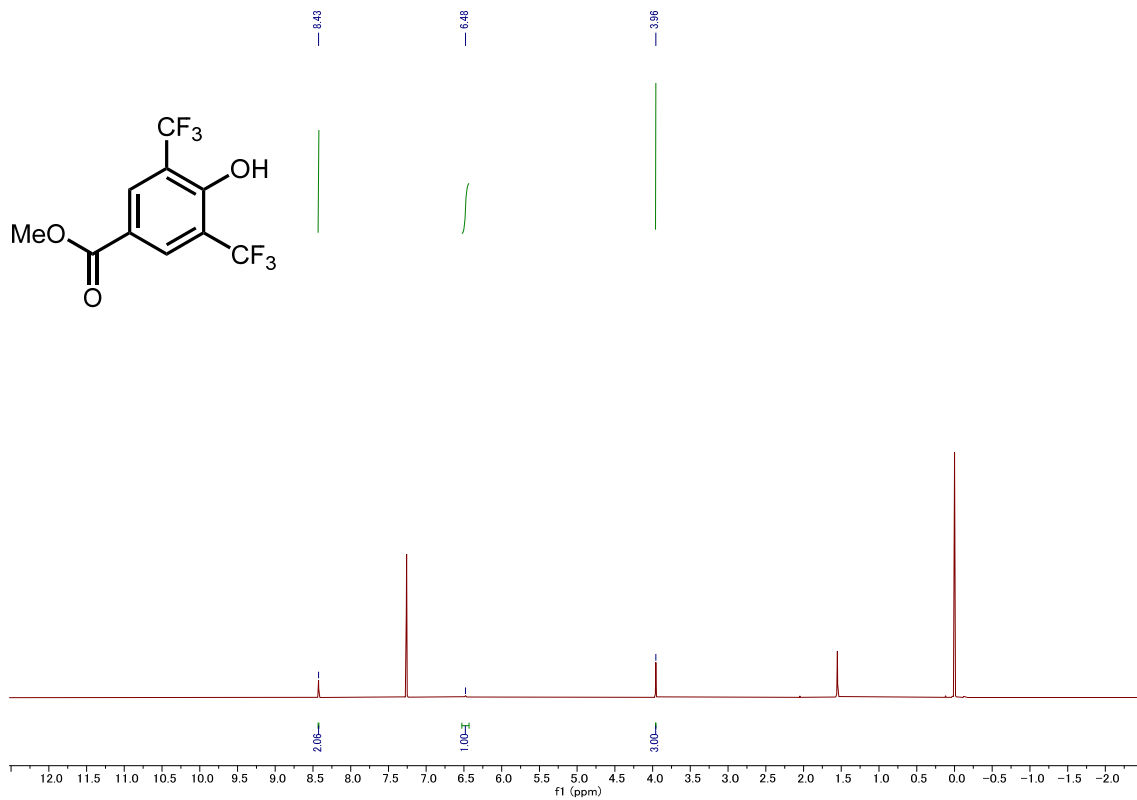

$^{13}\text{C}$  NMR (125 MHz,  $\text{CDCl}_3$ )

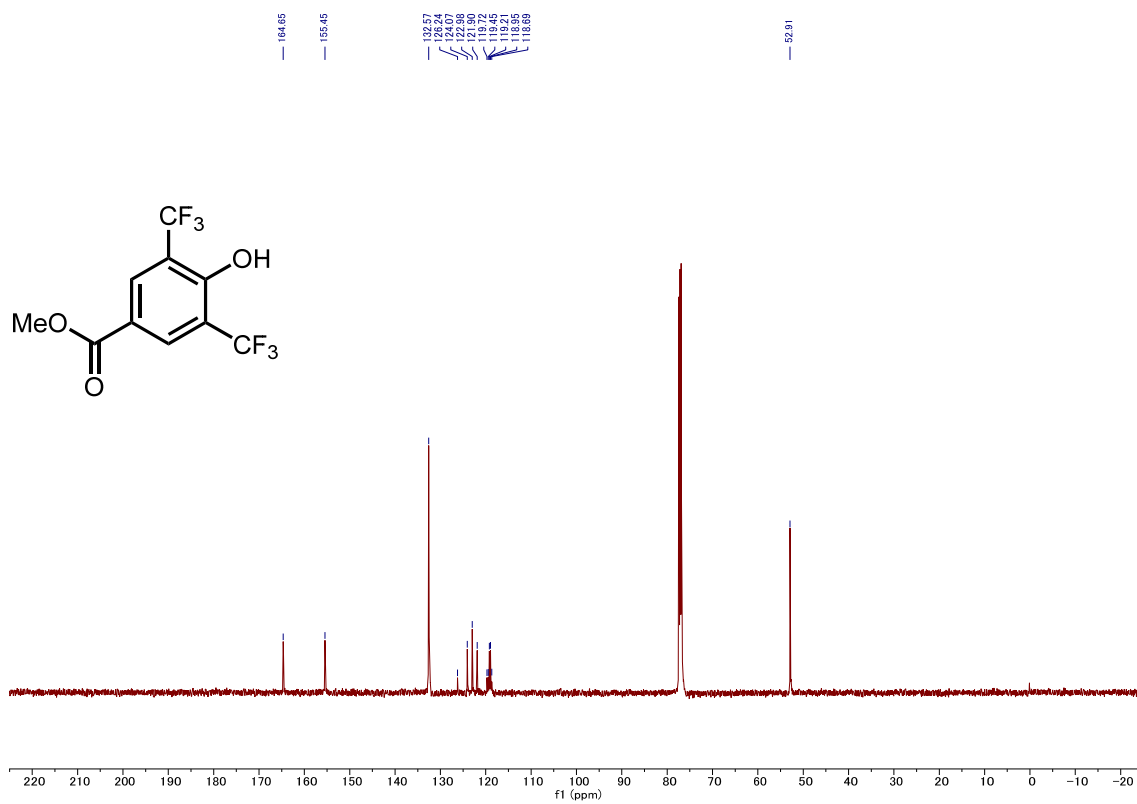

$^{19}\text{F}$  NMR (471 MHz,  $\text{CDCl}_3$ )

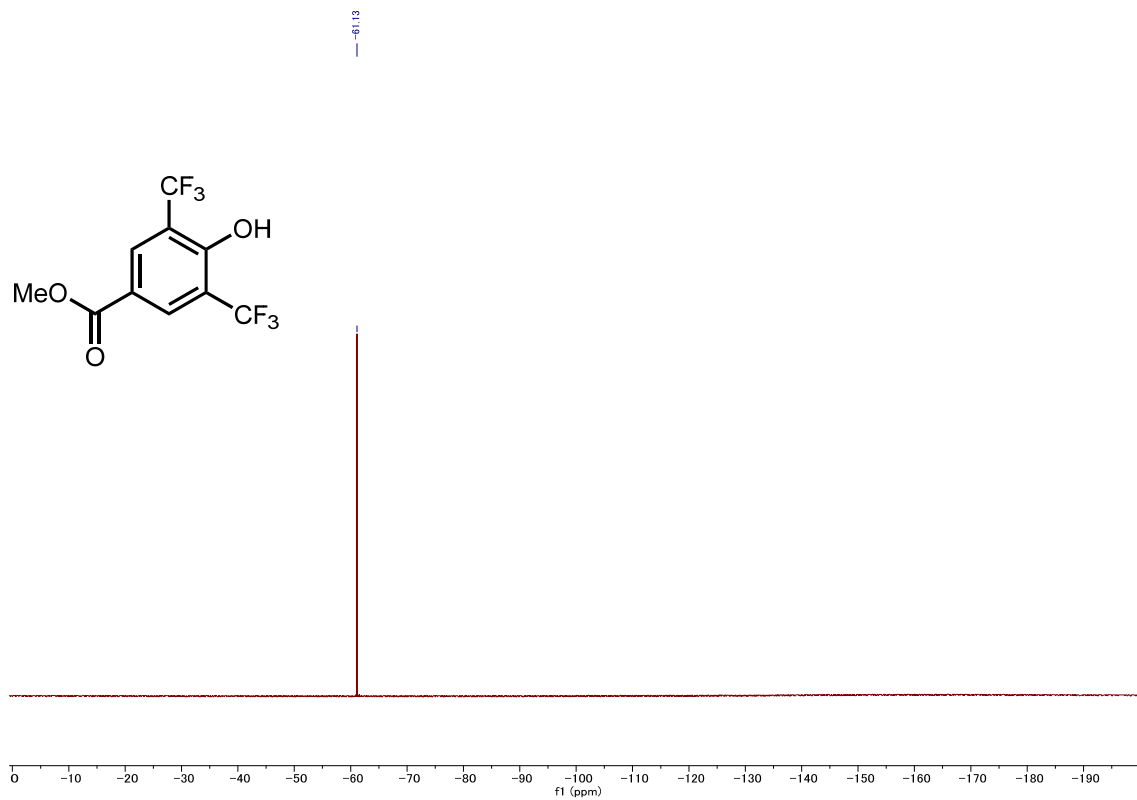

$^1\text{H}$  NMR (500 MHz,  $\text{CDCl}_3$ )

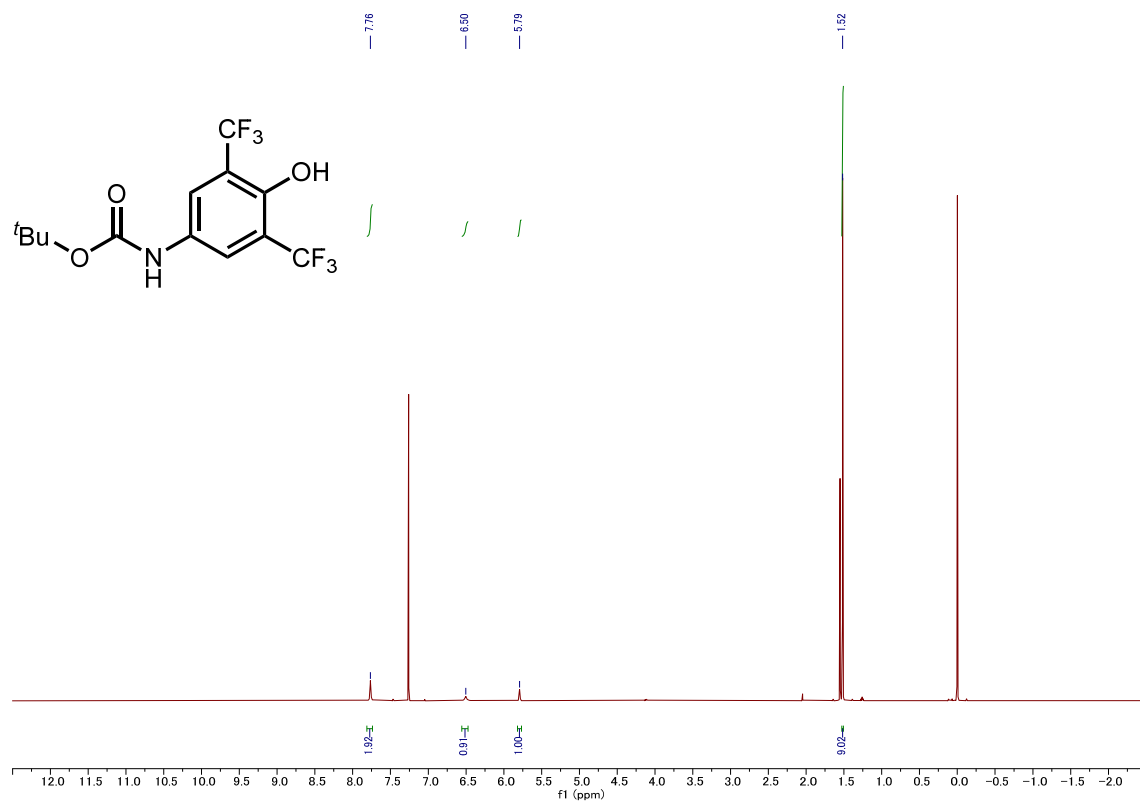

$^{13}\text{C}$  NMR (125 MHz,  $\text{CDCl}_3$ )

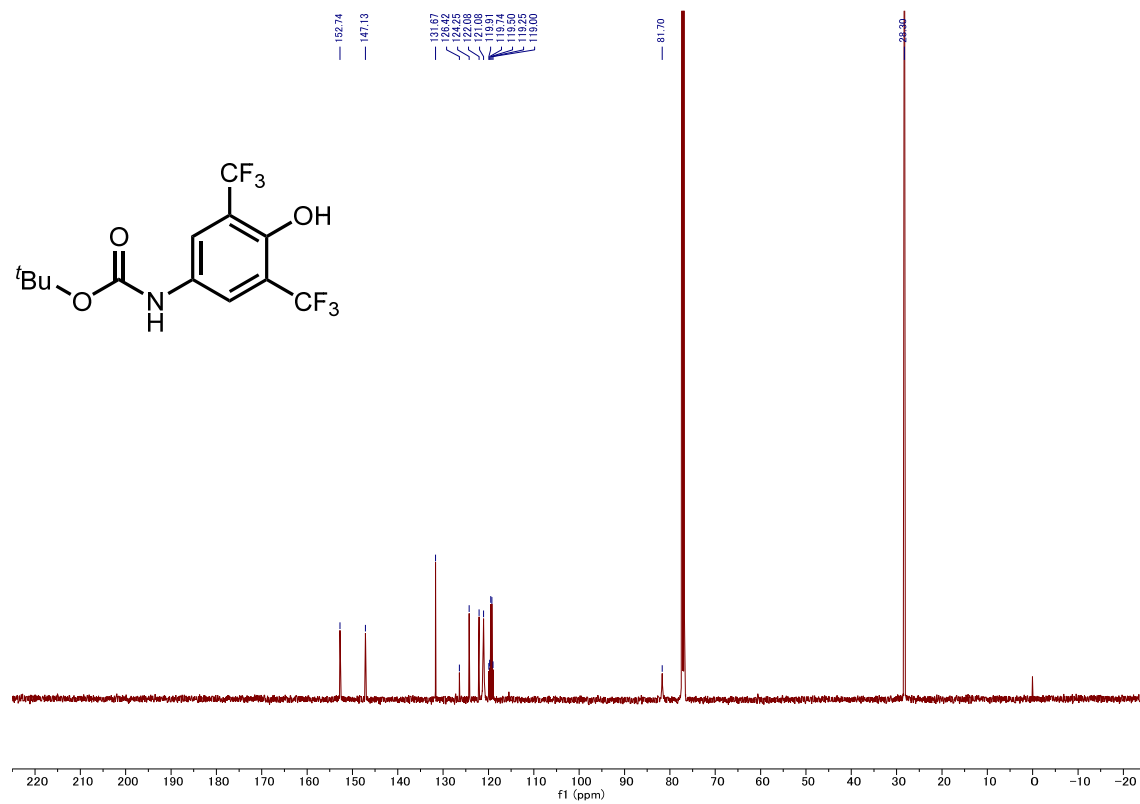

$^{19}\text{F}$  NMR (471 MHz,  $\text{CDCl}_3$ )

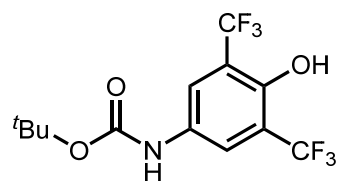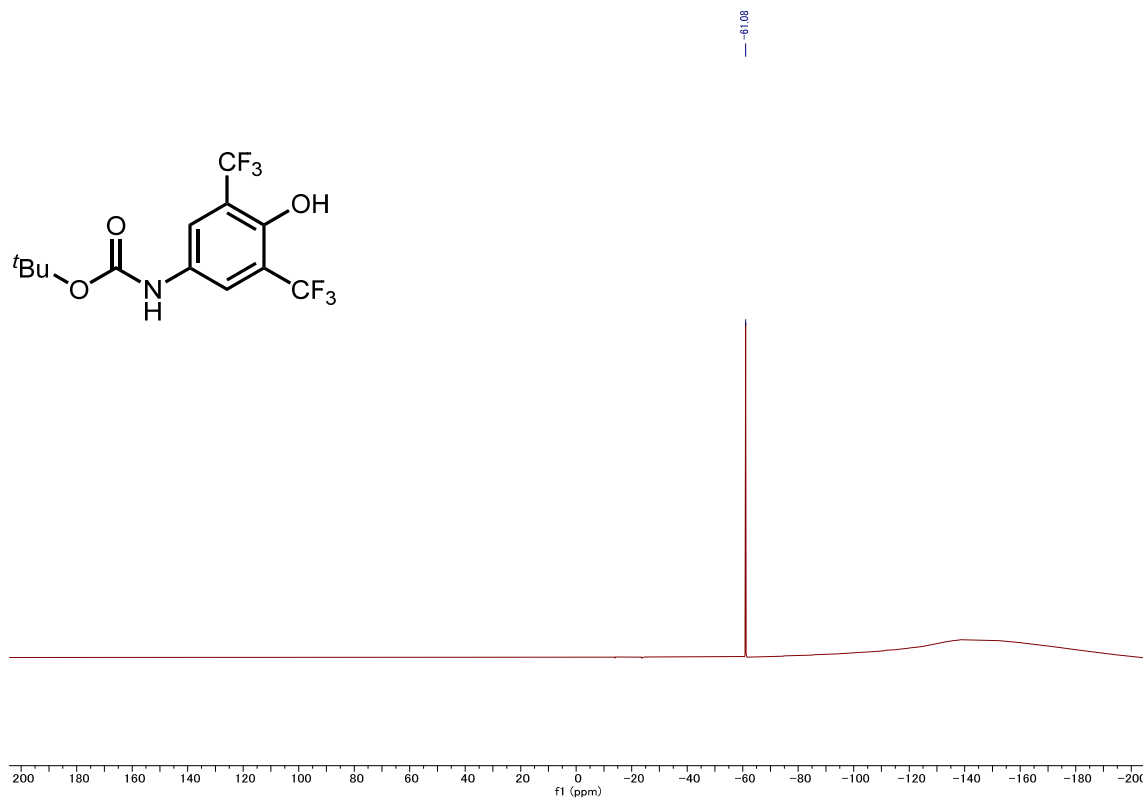

$^1\text{H}$  NMR (500 MHz,  $\text{CDCl}_3$ )

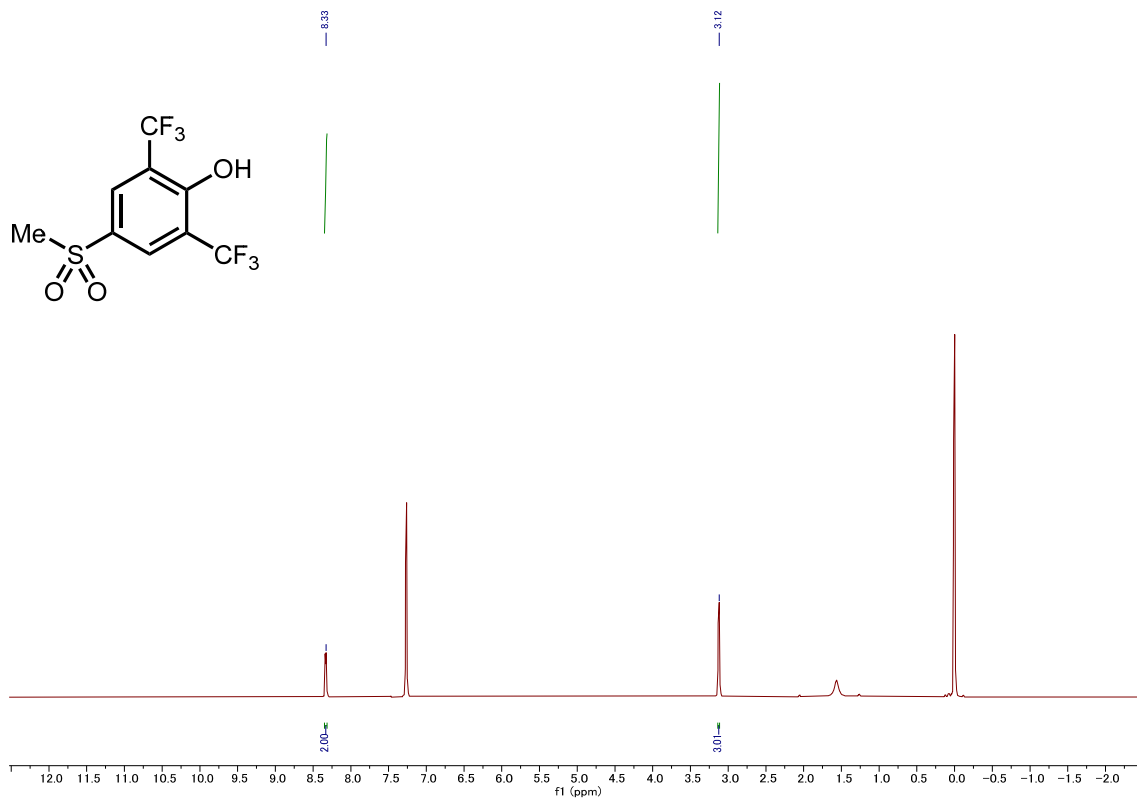

$^{13}\text{C}$  NMR (125 MHz,  $d\text{-DMSO}$ )

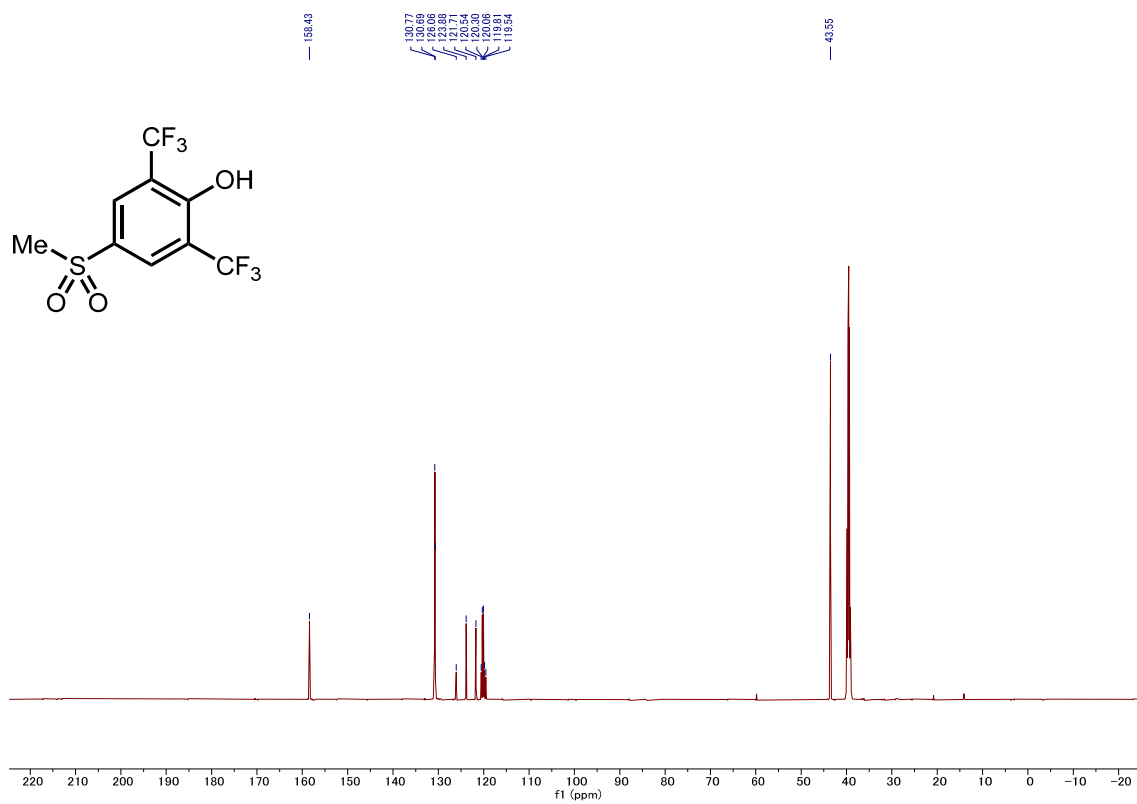



$^1\text{H}$  NMR (500 MHz,  $\text{CDCl}_3$ )

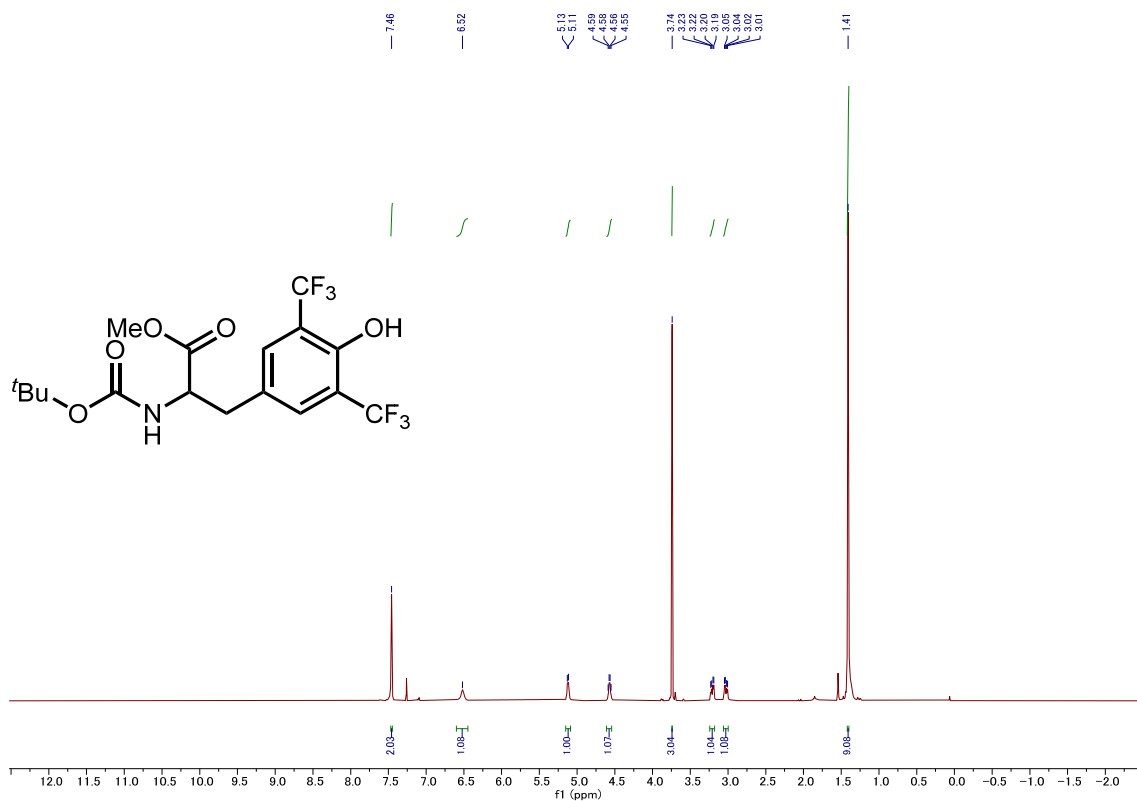

$^{13}\text{C}$  NMR (125 MHz,  $\text{CDCl}_3$ )

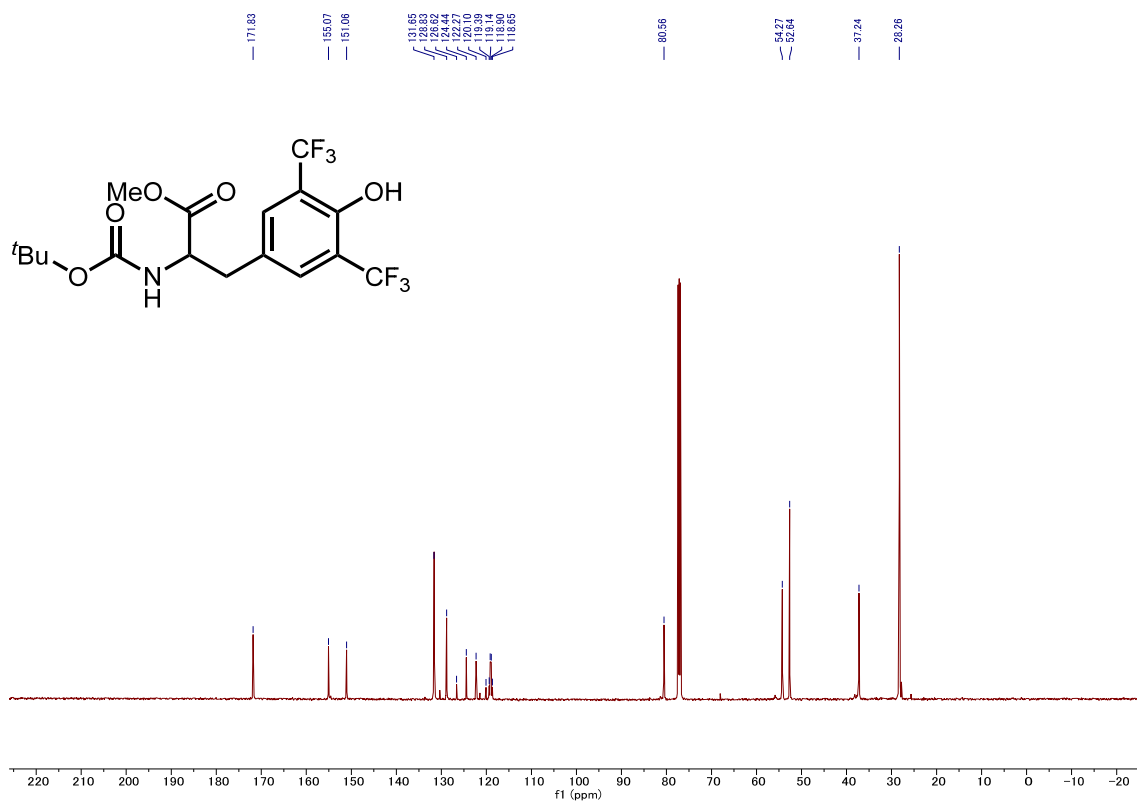

$^{19}\text{F}$  NMR (471 MHz,  $\text{CDCl}_3$ )

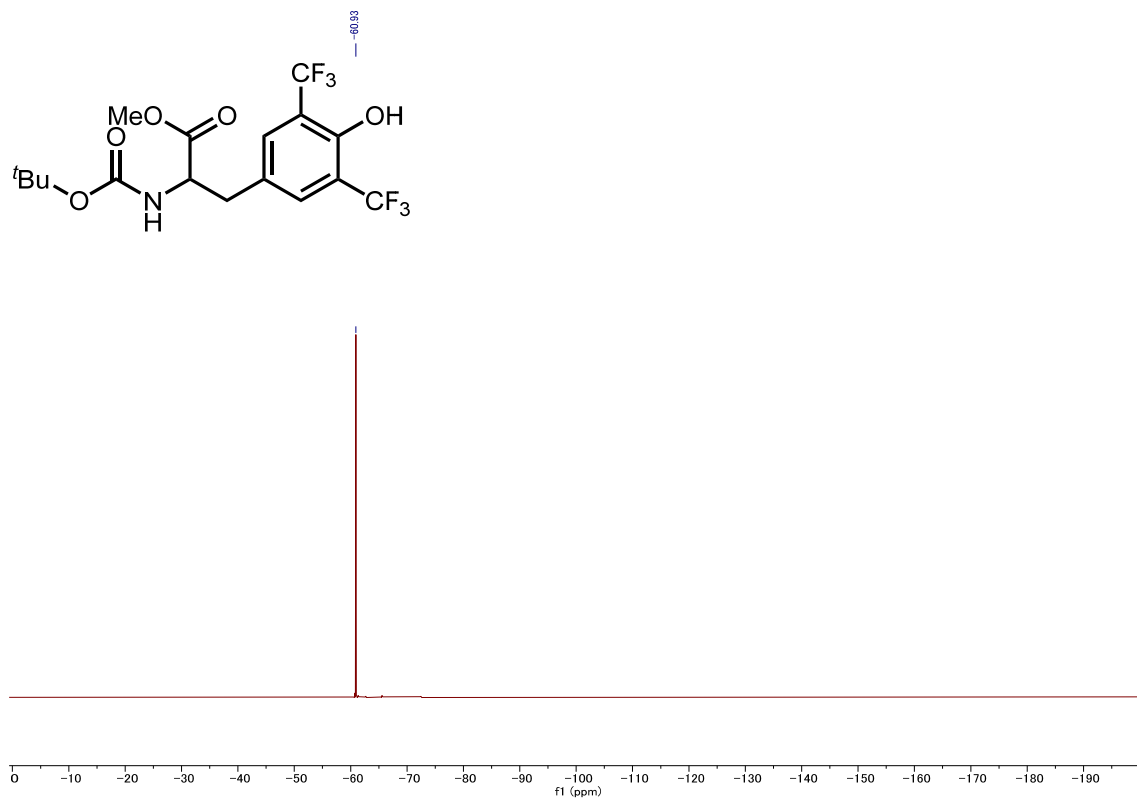



$^1\text{H}$  NMR (500 MHz,  $\text{CDCl}_3$ )

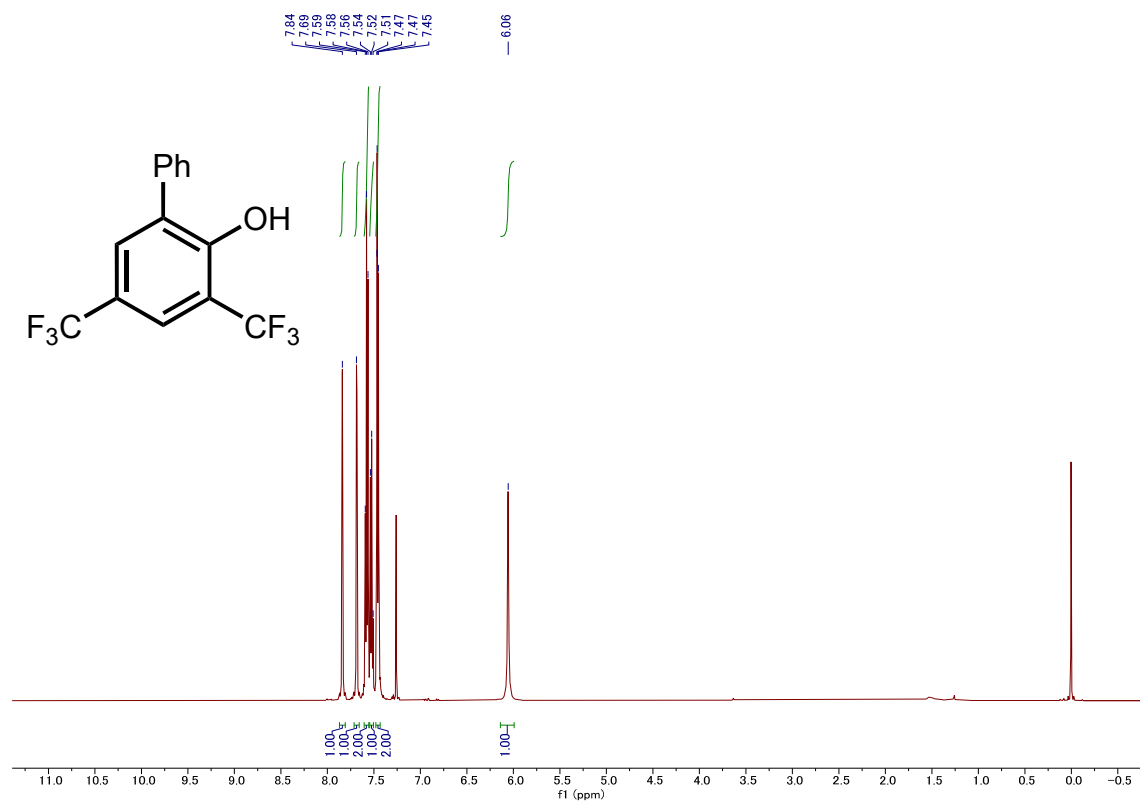

$^{13}\text{C}$  NMR (125 MHz,  $\text{CDCl}_3$ )

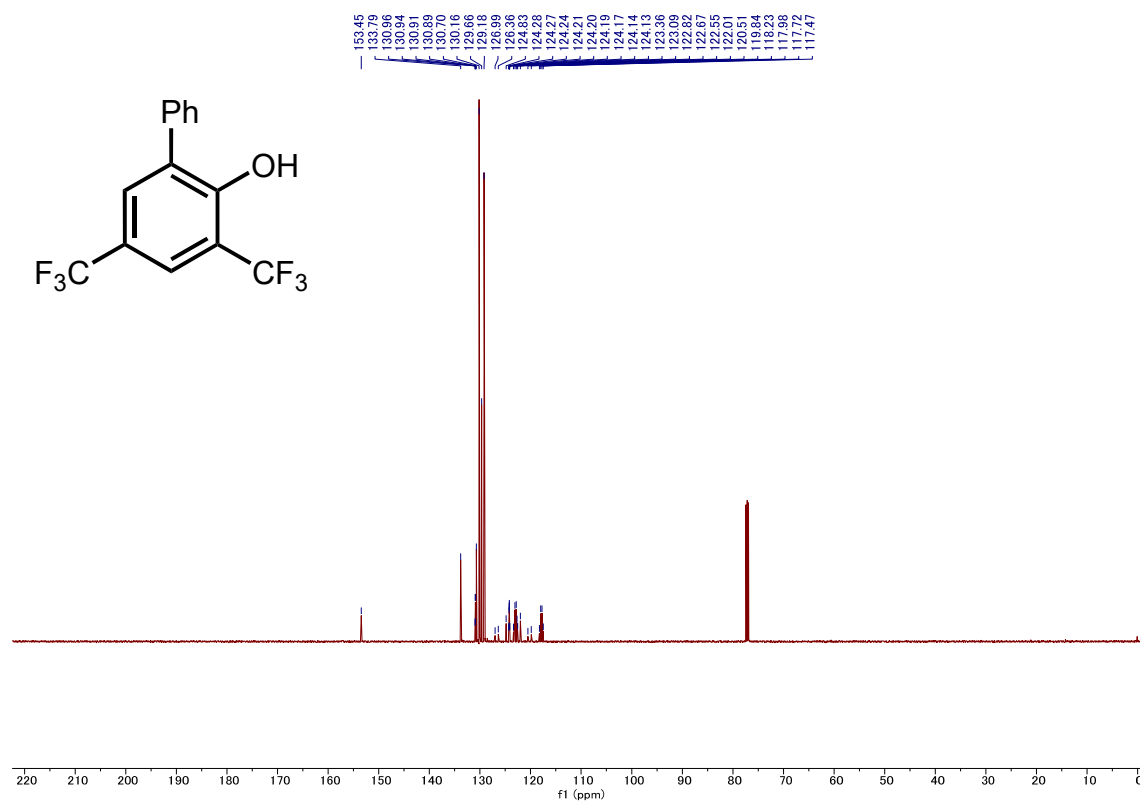

$^{19}\text{F}$  NMR (471 MHz,  $\text{CDCl}_3$ )

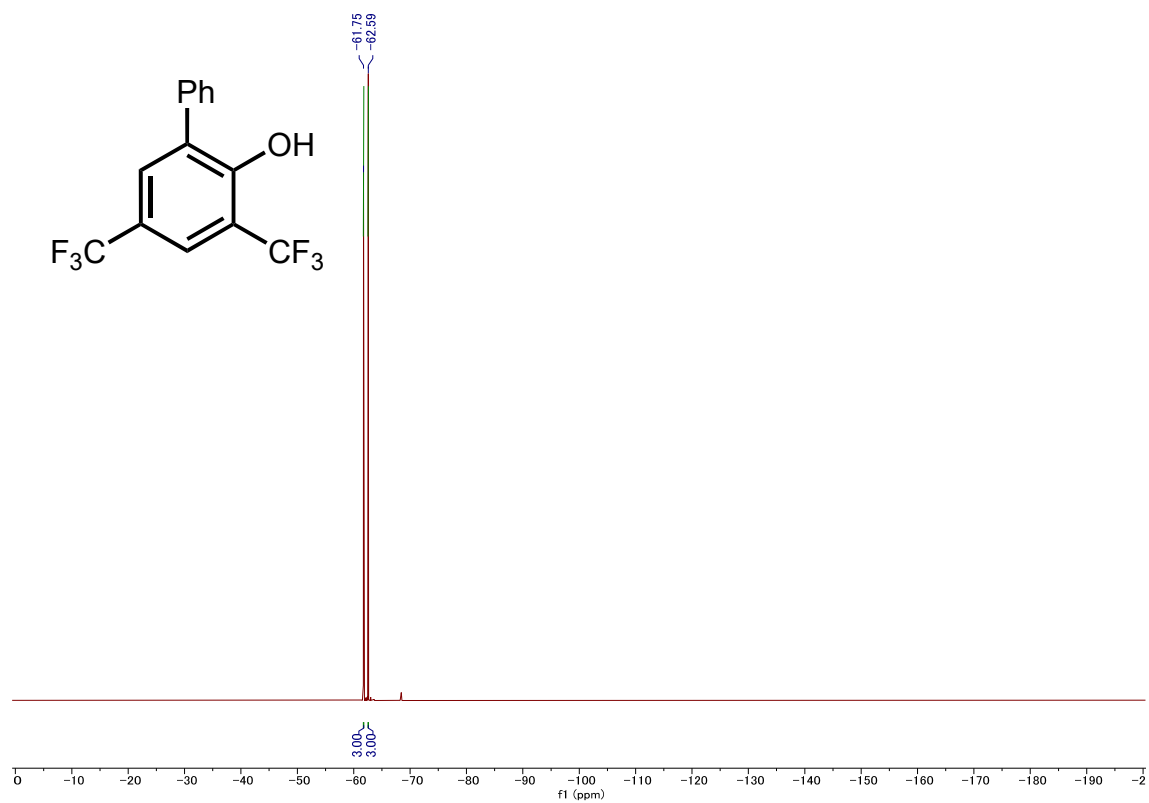

$^1\text{H}$  NMR (500 MHz,  $\text{CDCl}_3$ )

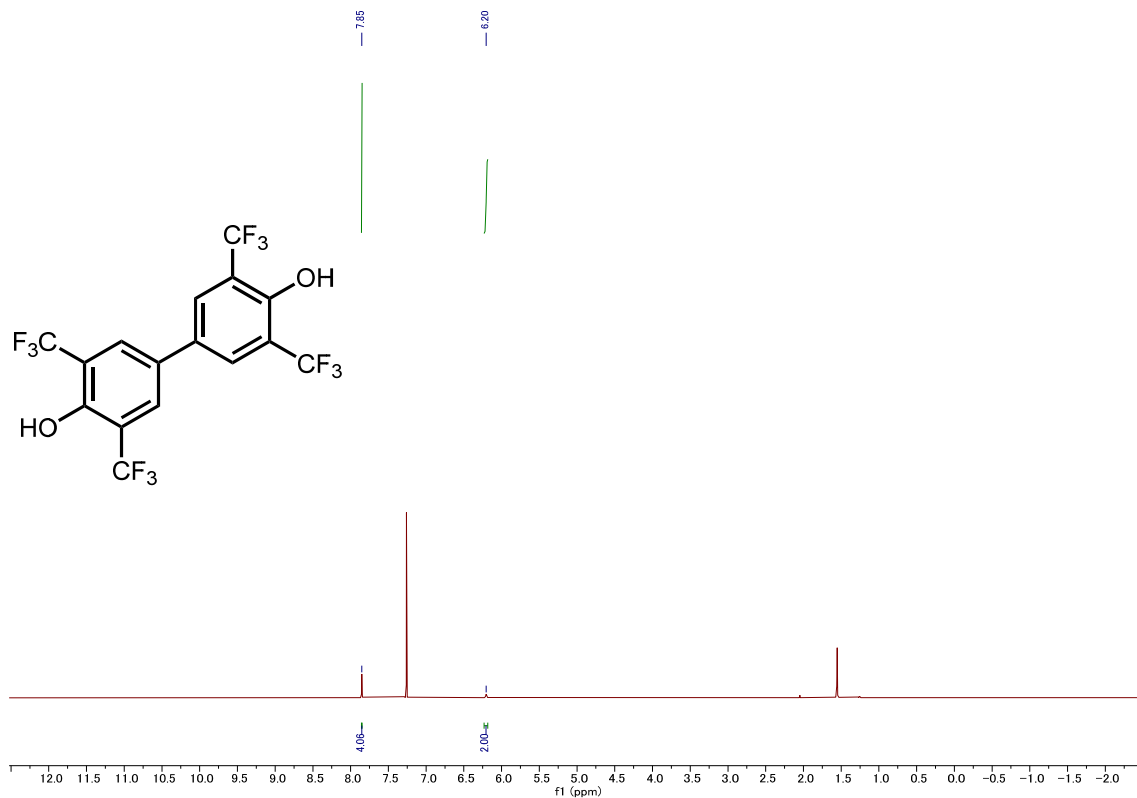

$^{13}\text{C}$  NMR (125 MHz,  $d$ -DMSO)

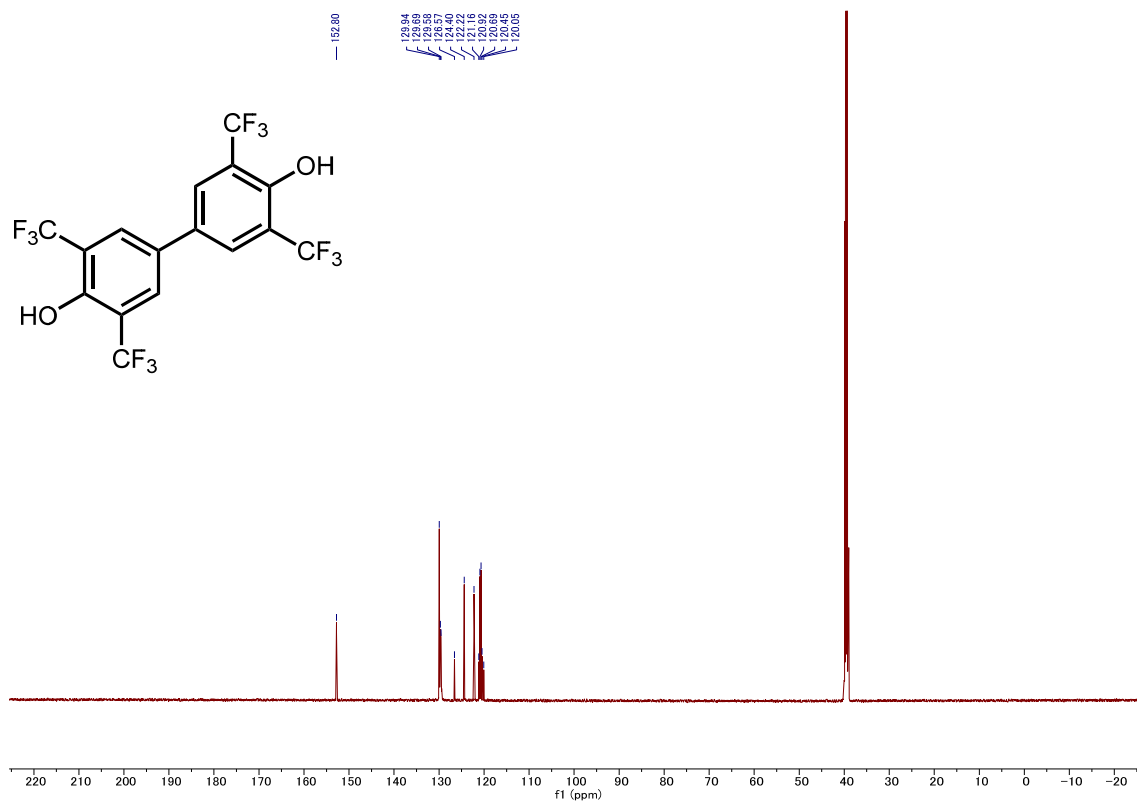

$^{19}\text{F}$  NMR (471 MHz,  $\text{CDCl}_3$ )

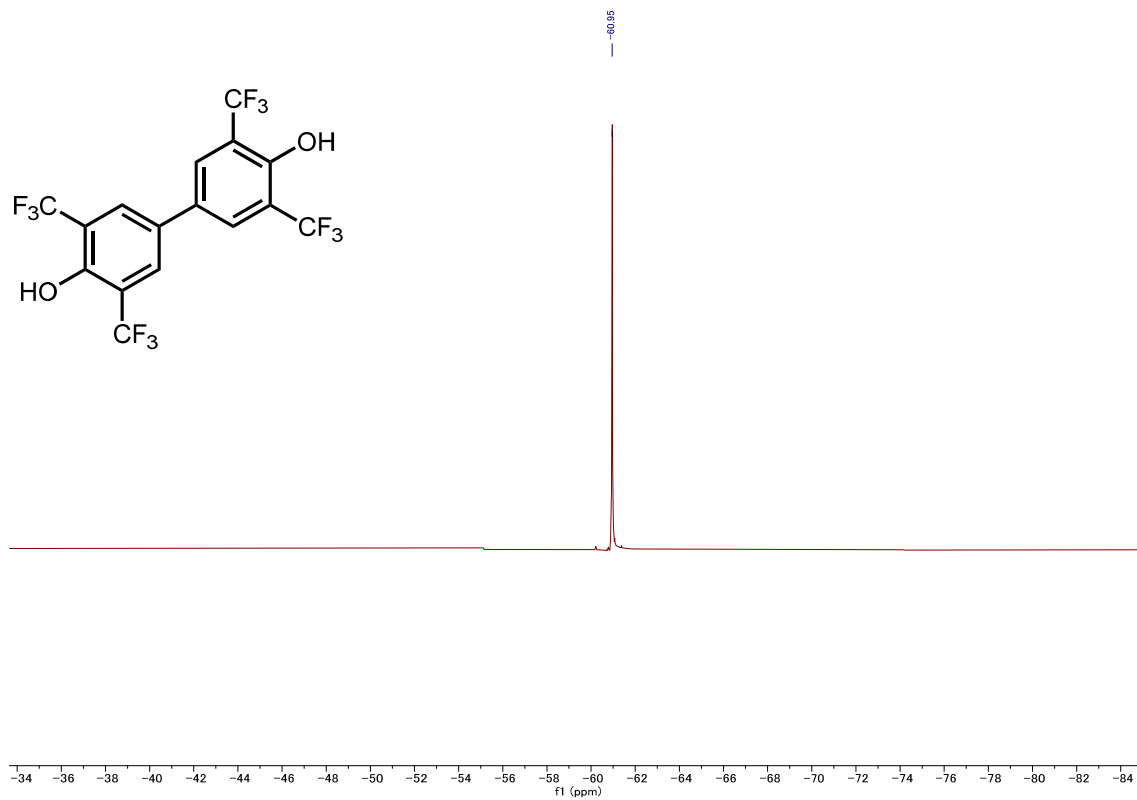

$^1\text{H}$  NMR (500 MHz,  $\text{CDCl}_3$ )

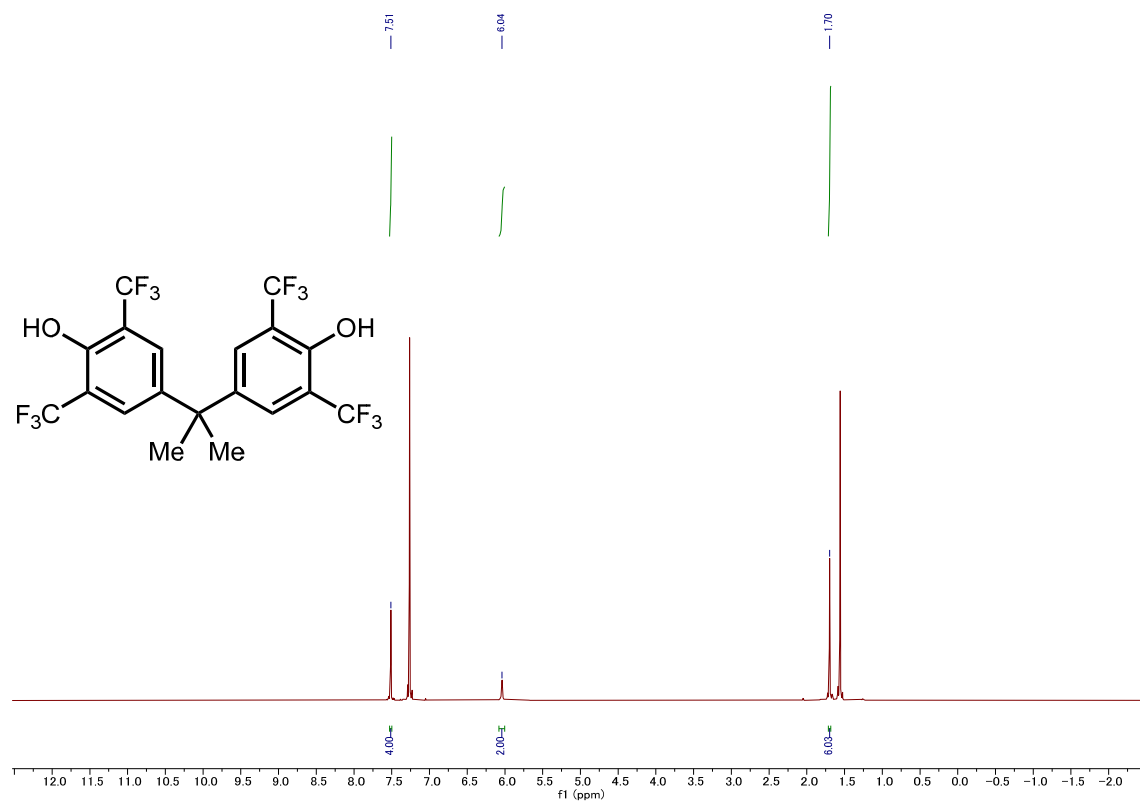

$^{13}\text{C}$  NMR (125 MHz,  $d\text{-DMSO}$ )

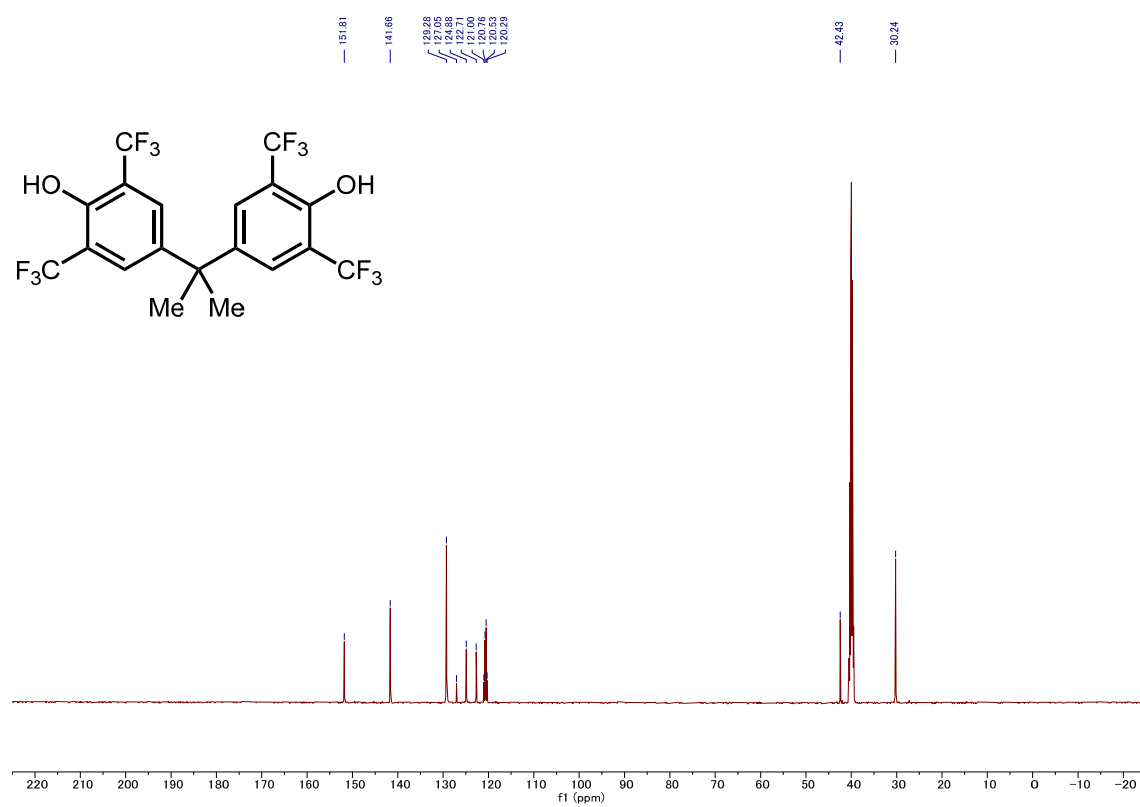

$^{19}\text{F}$  NMR (471 MHz,  $\text{CDCl}_3$ )

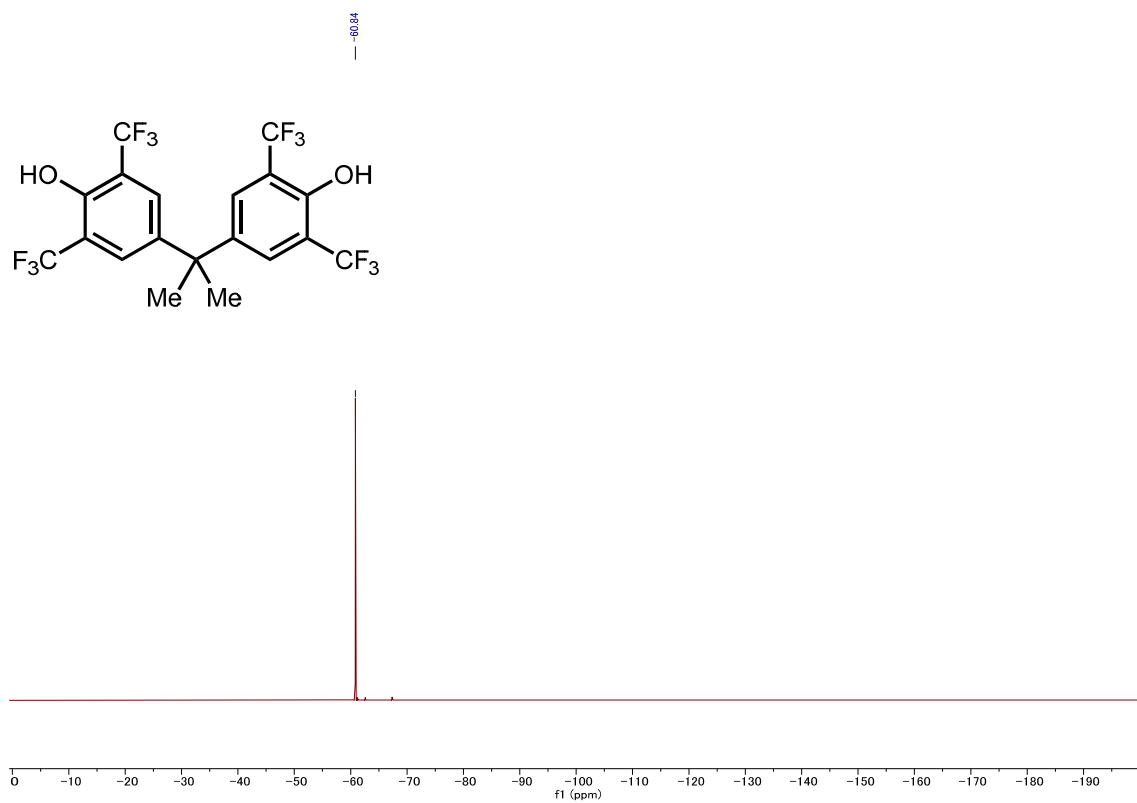

$^1\text{H}$  NMR (500 MHz,  $\text{CDCl}_3$ )

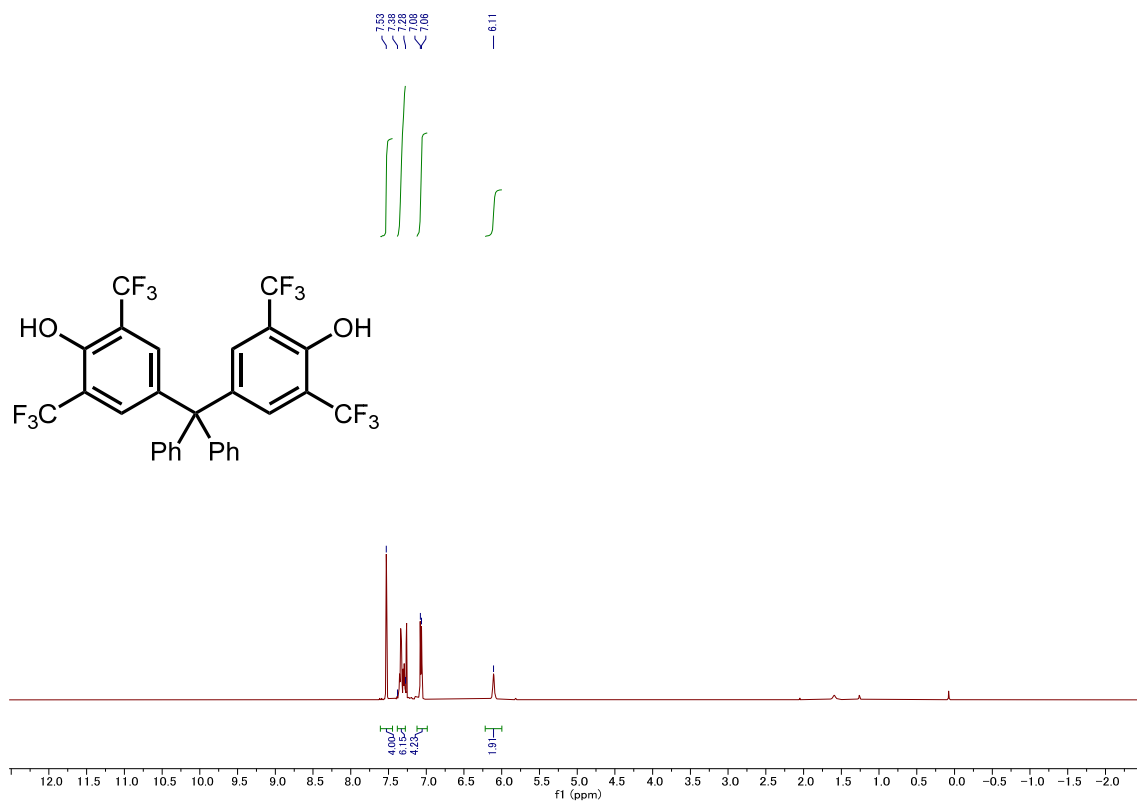

$^{13}\text{C}$  NMR (125 MHz,  $d\text{-DMSO}$ )

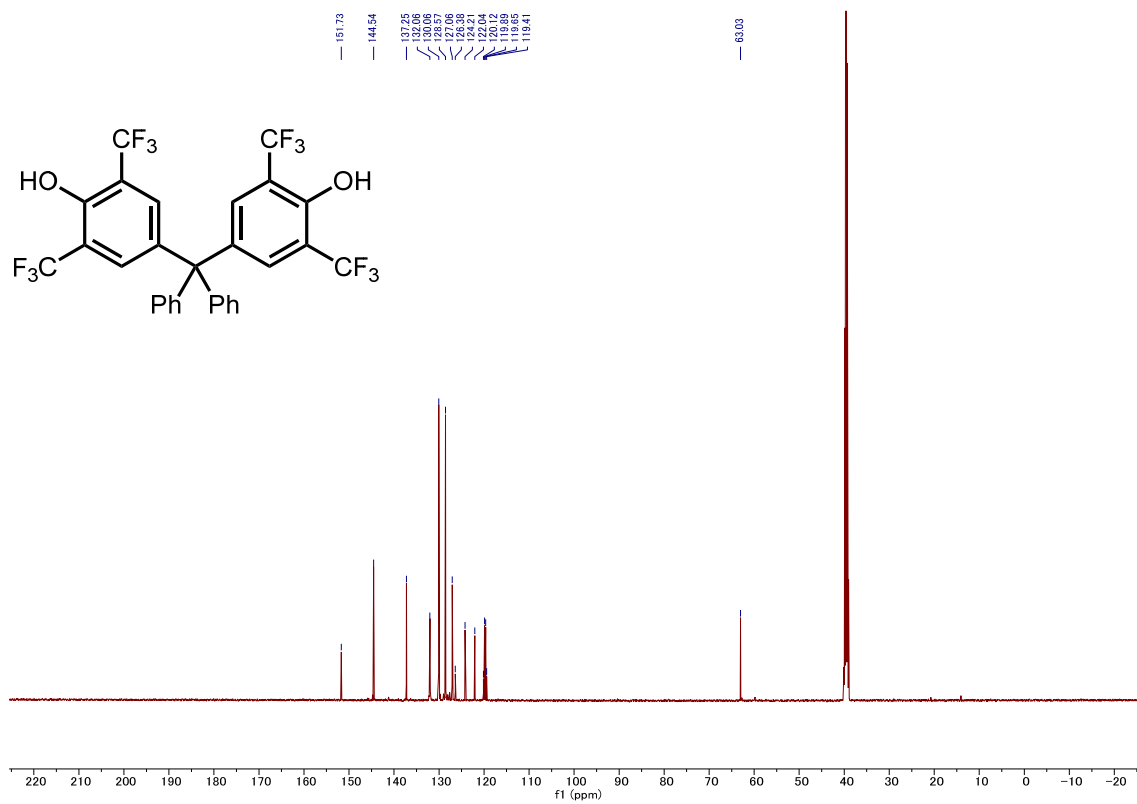





$^1\text{H}$  NMR (500 MHz,  $\text{CDCl}_3$ )

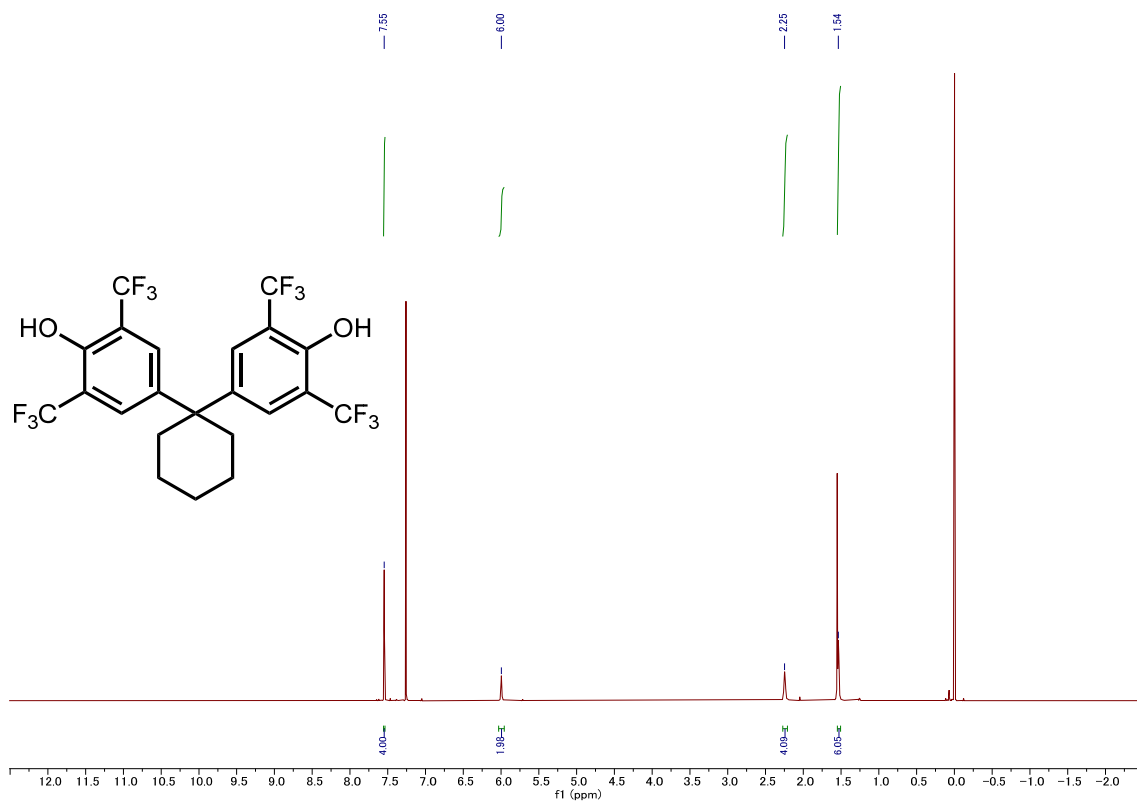

$^{13}\text{C}$  NMR (125 MHz,  $d\text{-DMSO}$ )

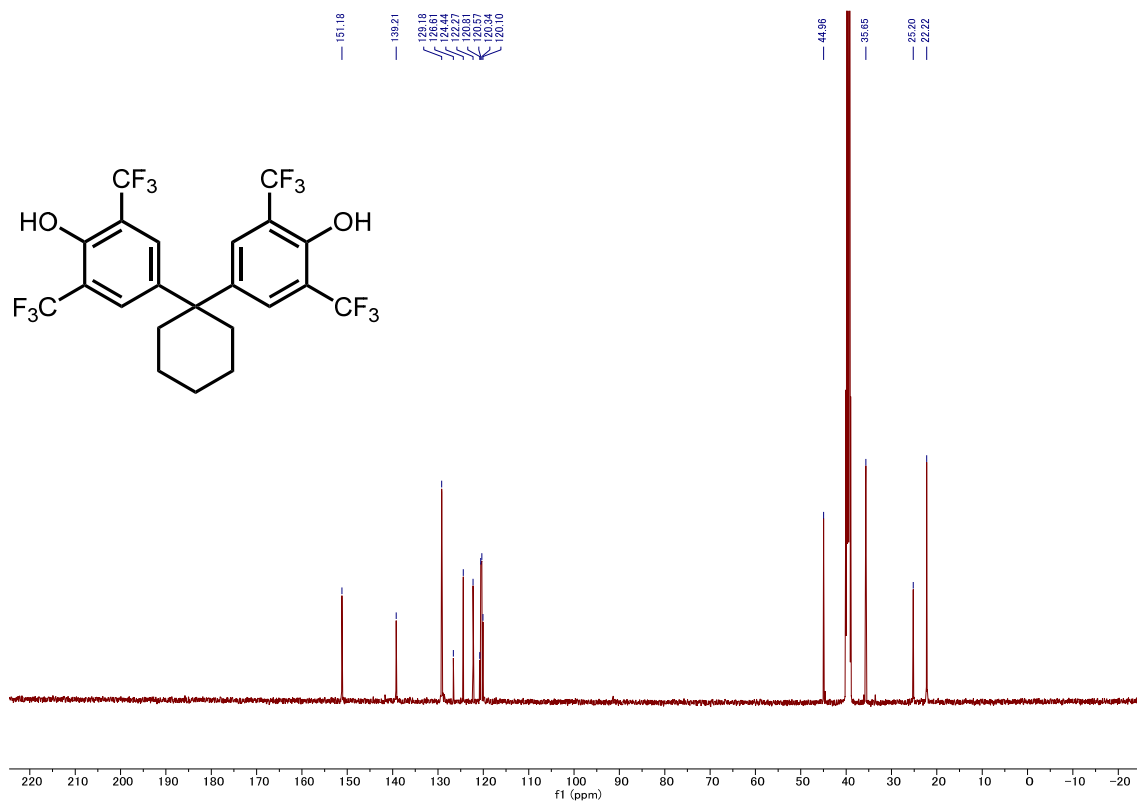

$^{19}\text{F}$  NMR (471 MHz,  $\text{CDCl}_3$ )

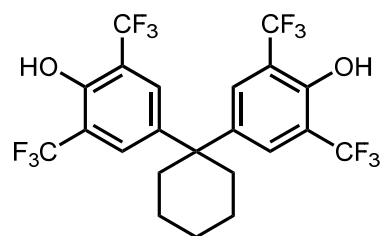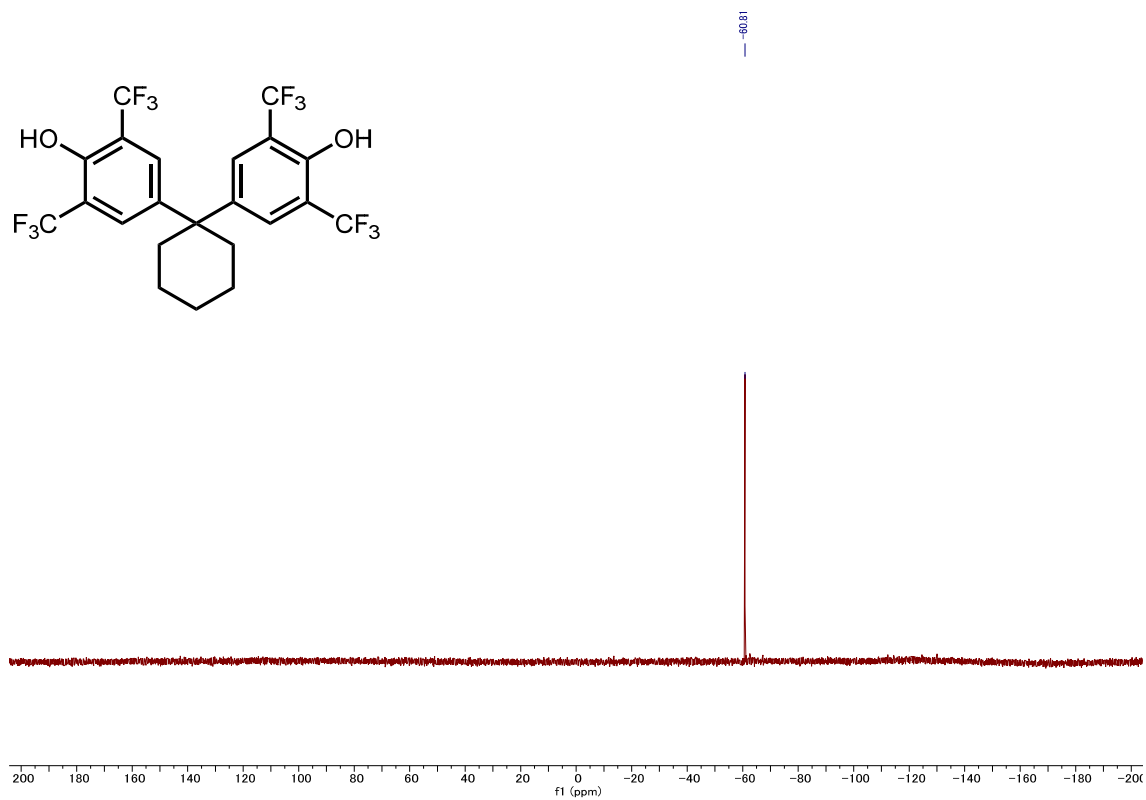

$^1\text{H}$  NMR (500 MHz,  $\text{CDCl}_3$ )

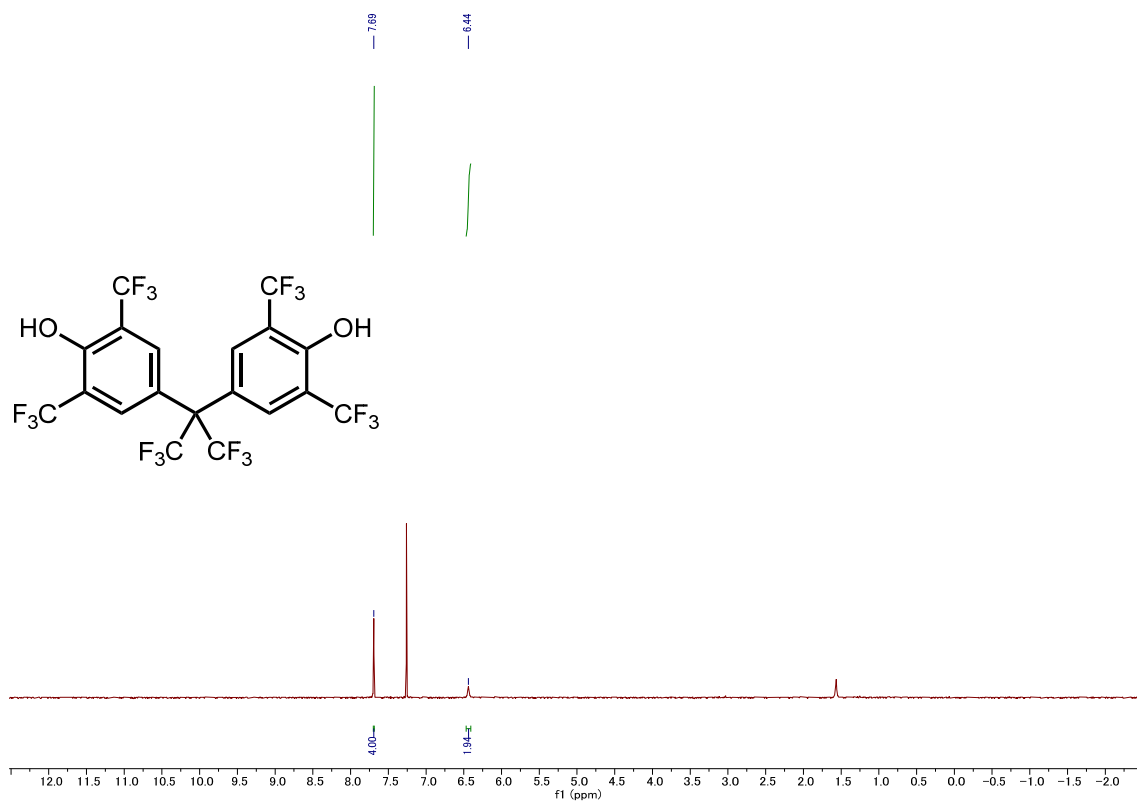

$^{13}\text{C}$  NMR (125 MHz,  $d\text{-DMSO}$ )

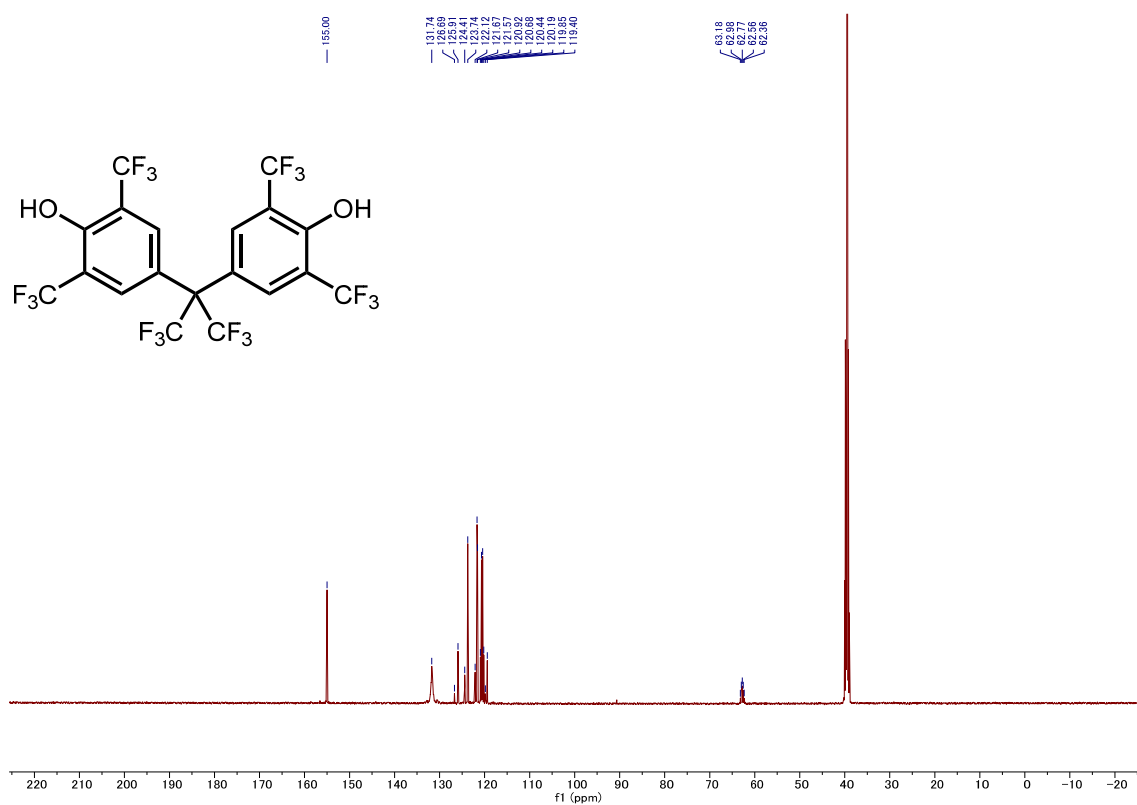

$^{19}\text{F}$  NMR (471 MHz,  $\text{CDCl}_3$ )

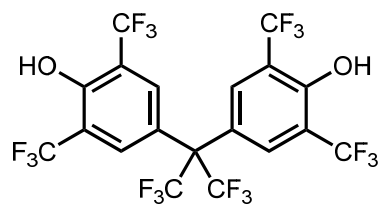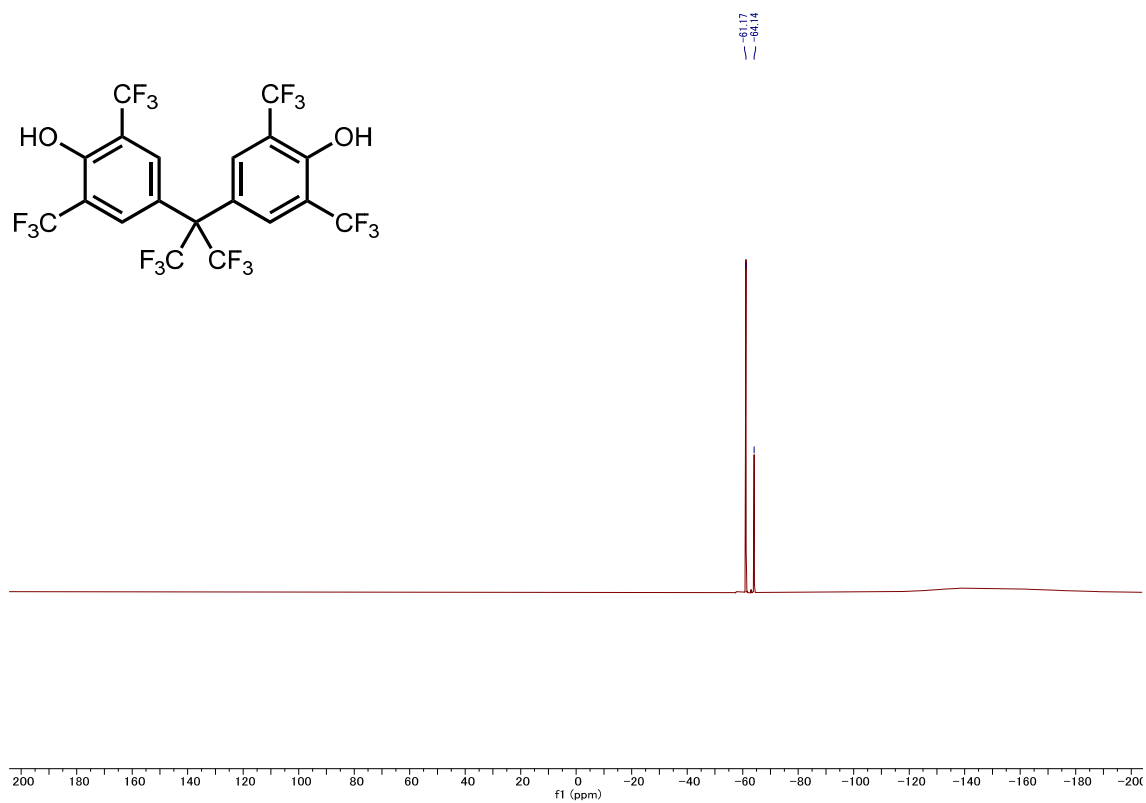

$^1\text{H}$  NMR (500 MHz,  $\text{CDCl}_3$ )

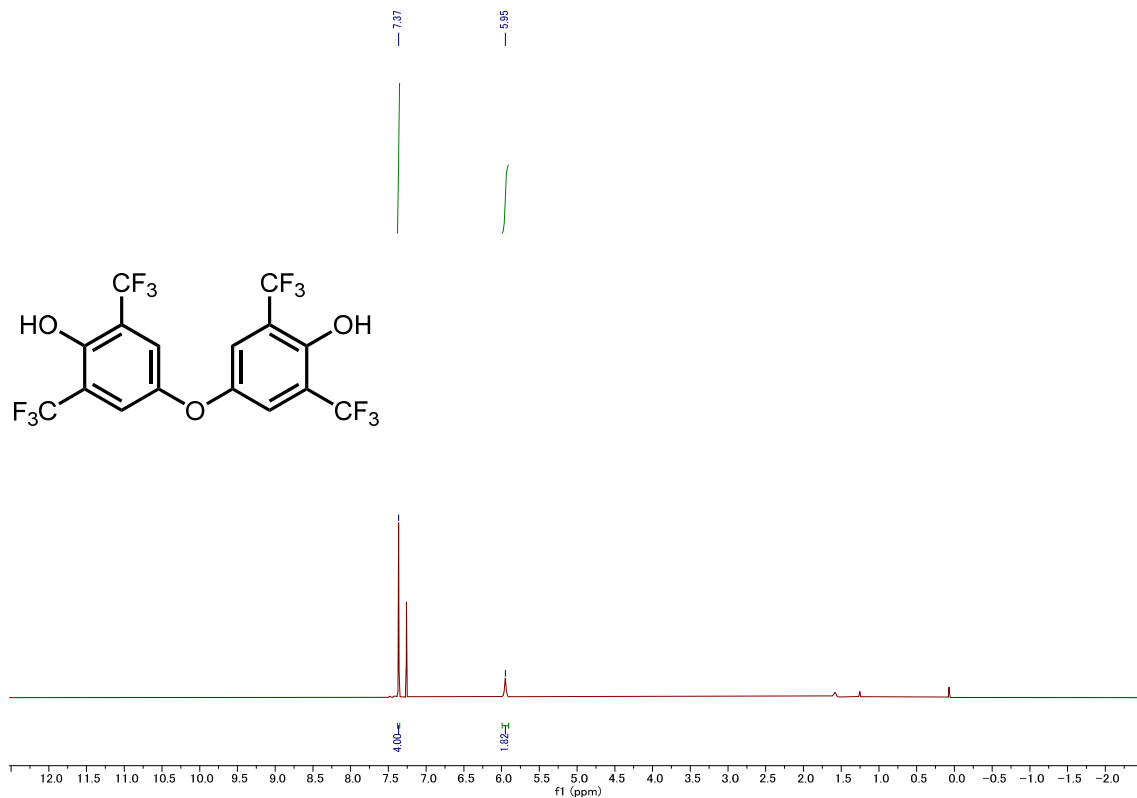

$^{13}\text{C}$  NMR (125 MHz,  $d\text{-DMSO}$ )

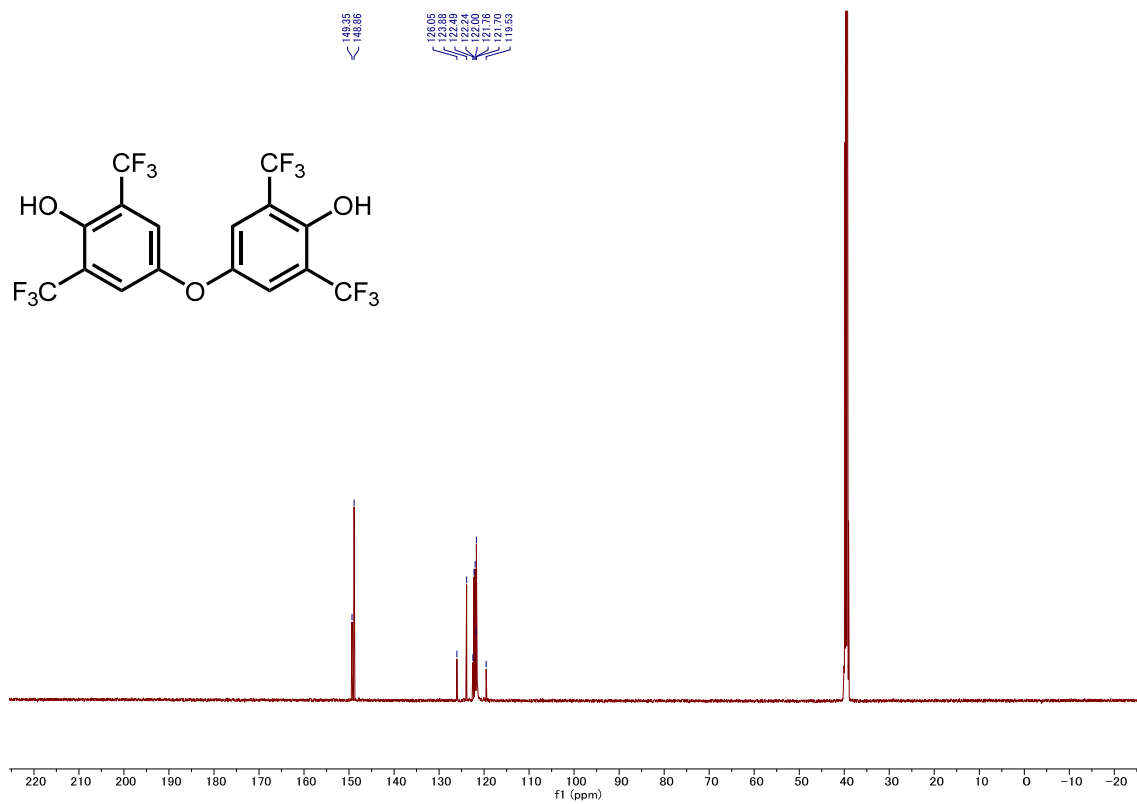

$^{19}\text{F}$  NMR (471 MHz,  $\text{CDCl}_3$ )

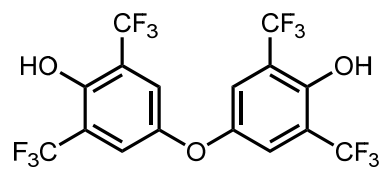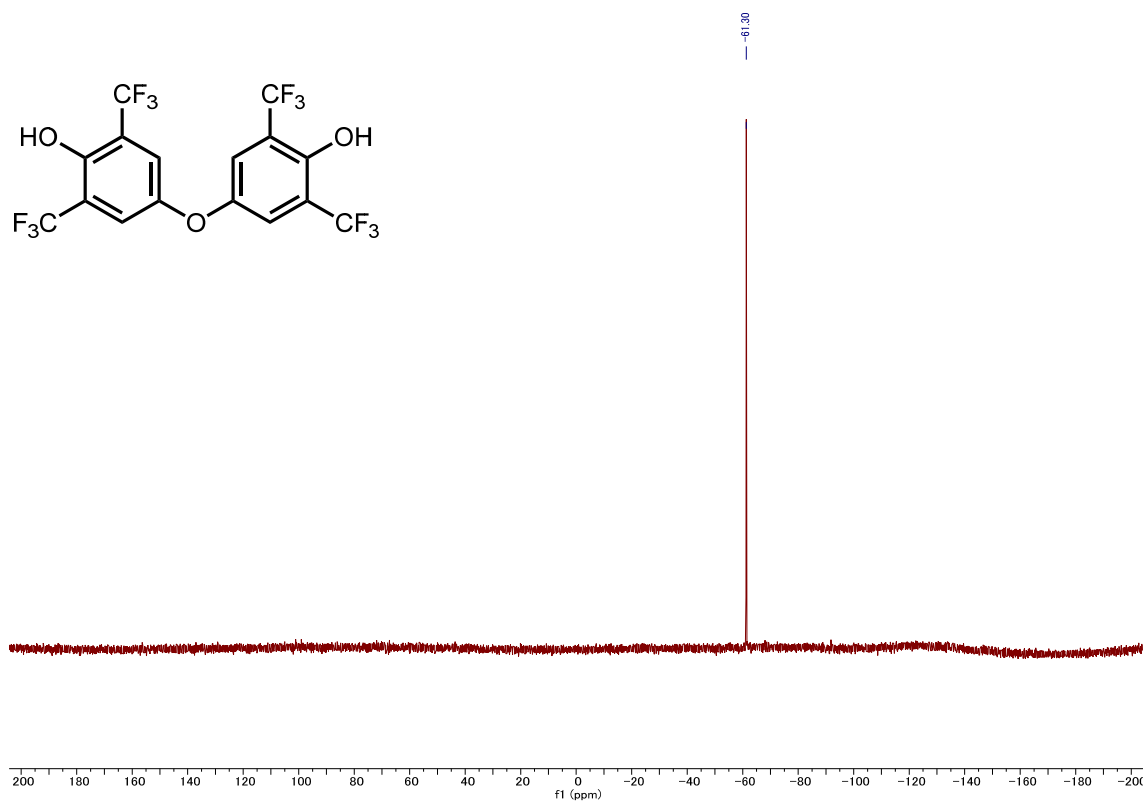

$^1\text{H}$  NMR (500 MHz,  $\text{CDCl}_3$ )

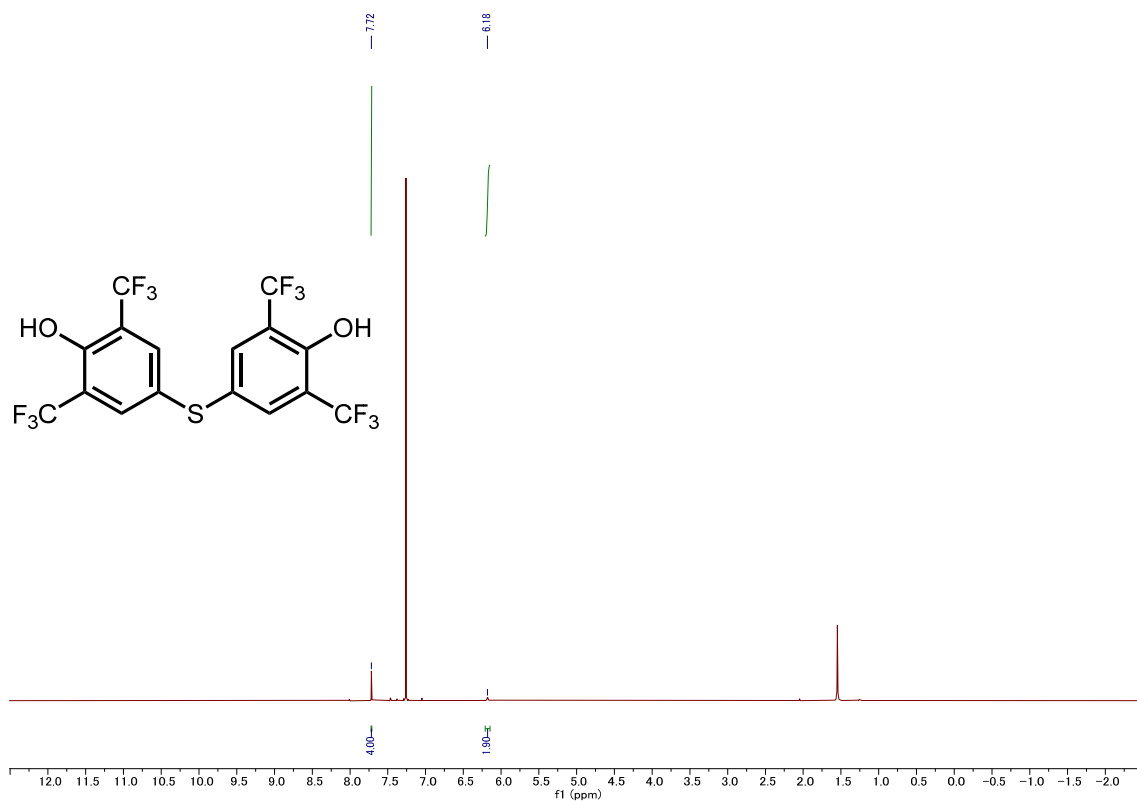

$^{13}\text{C}$  NMR (125 MHz,  $d\text{-DMSO}$ )

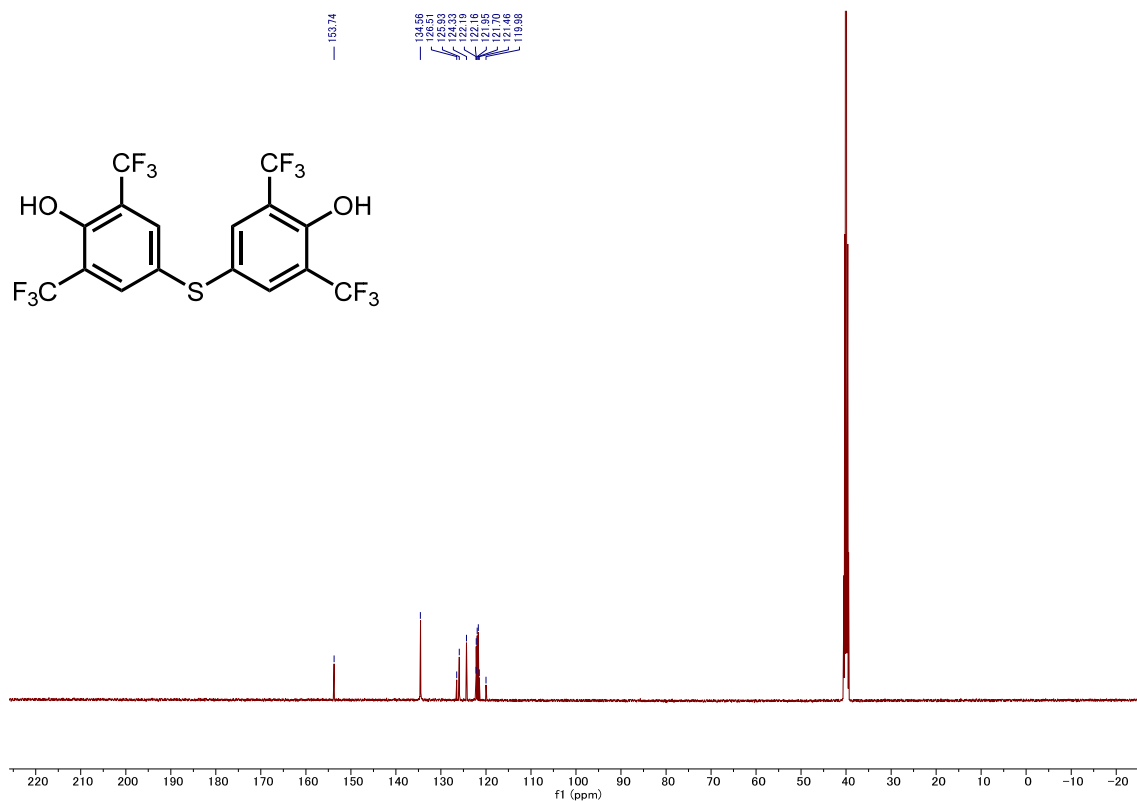

$^{19}\text{F}$  NMR (471 MHz,  $\text{CDCl}_3$ )

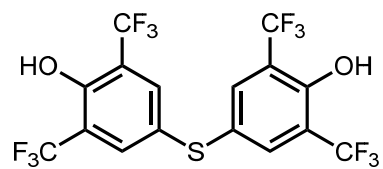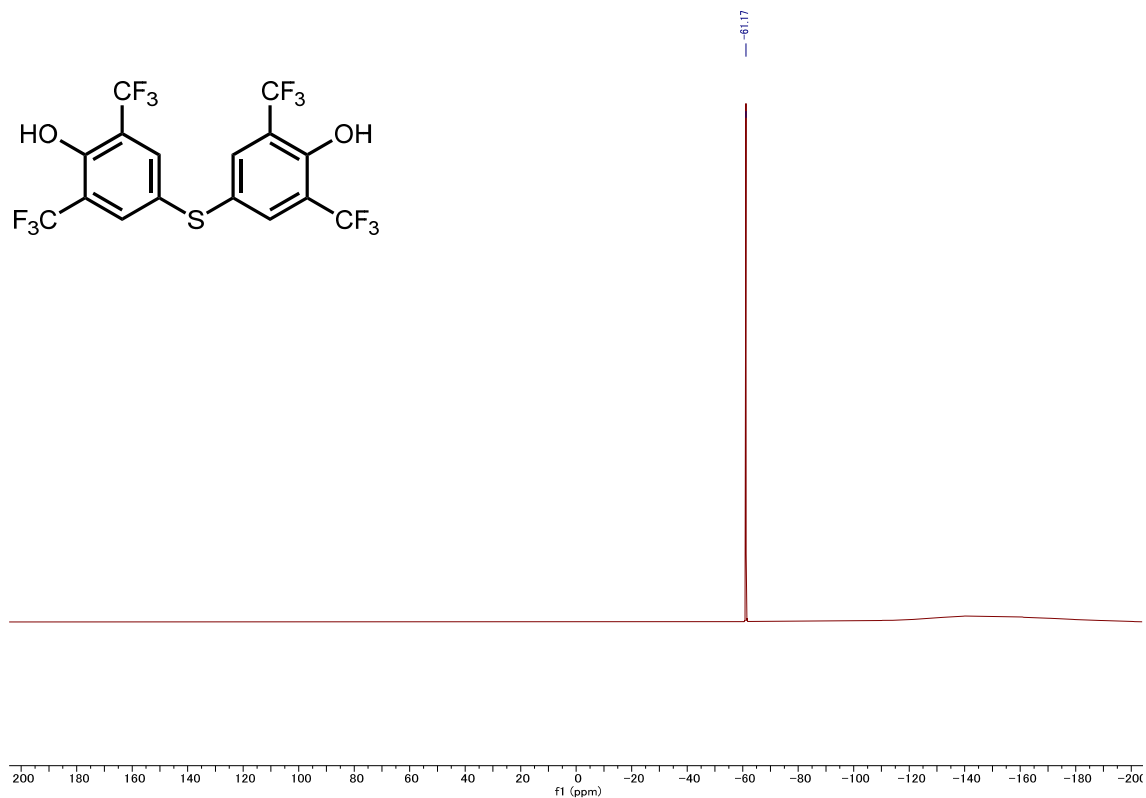



$^1\text{H}$  NMR (500 MHz,  $\text{CDCl}_3$ )

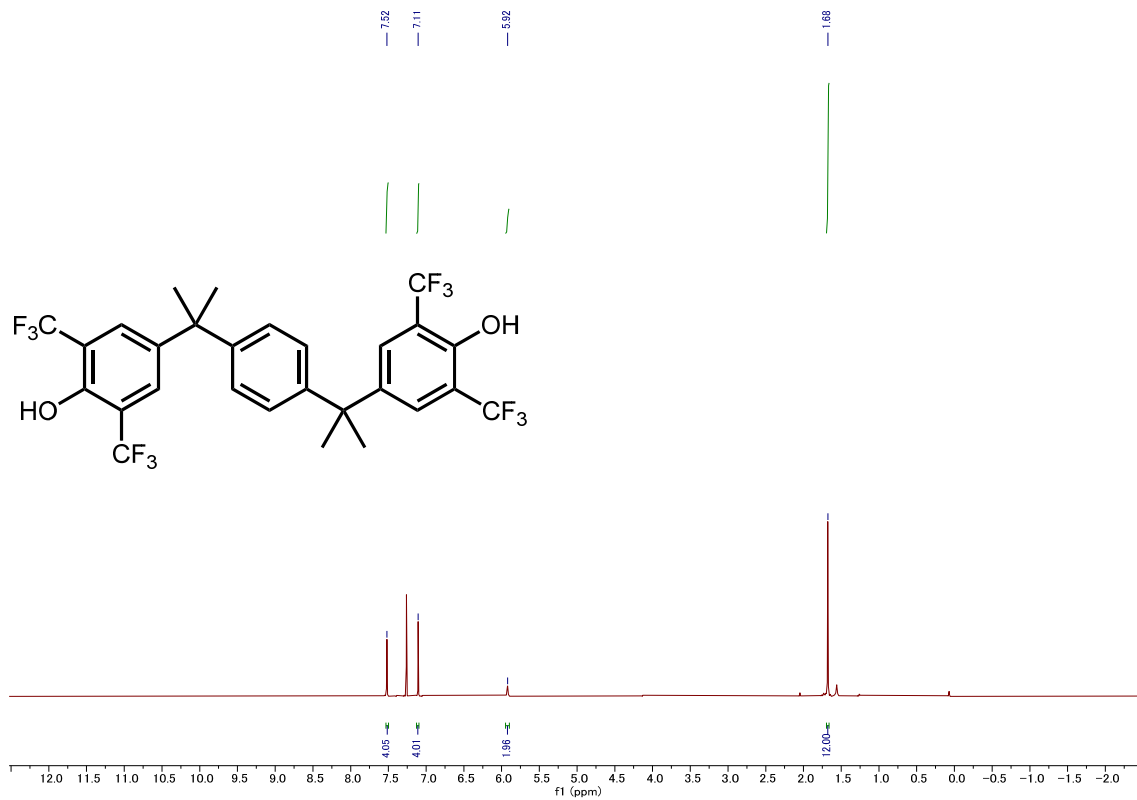

$^{13}\text{C}$  NMR (125 MHz,  $d\text{-DMSO}$ )

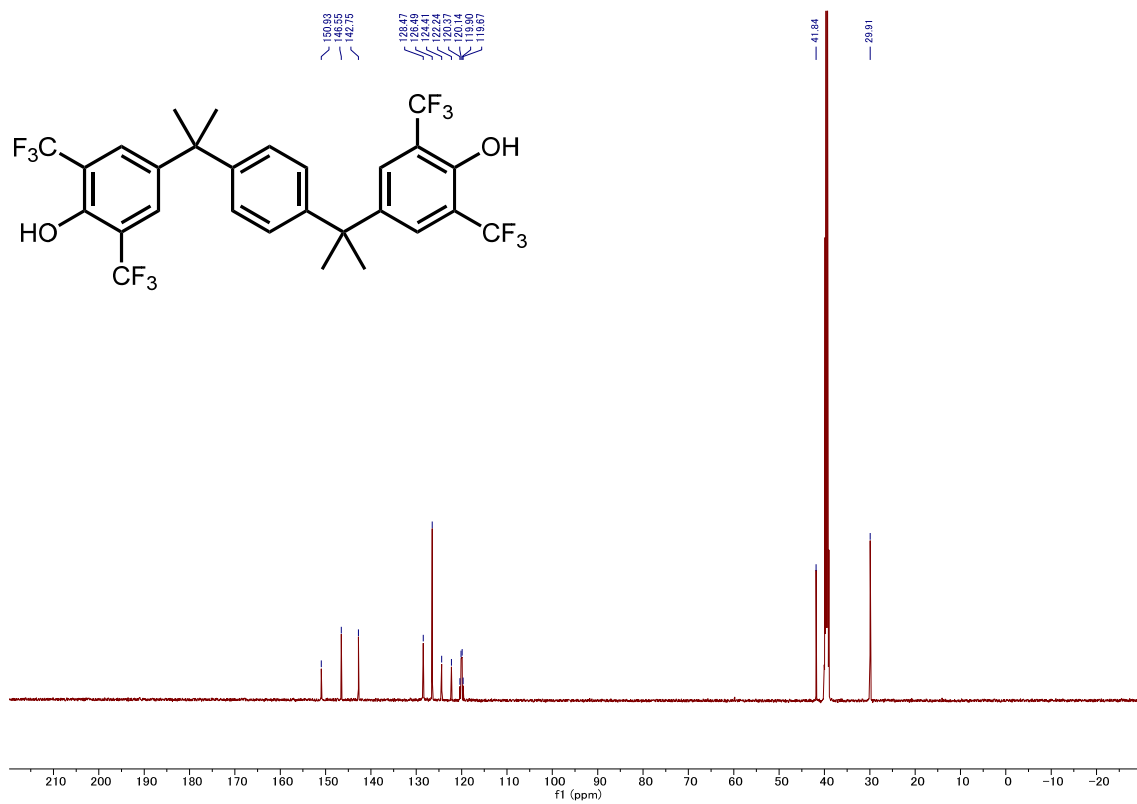

$^{19}\text{F}$  NMR (471 MHz,  $\text{CDCl}_3$ )

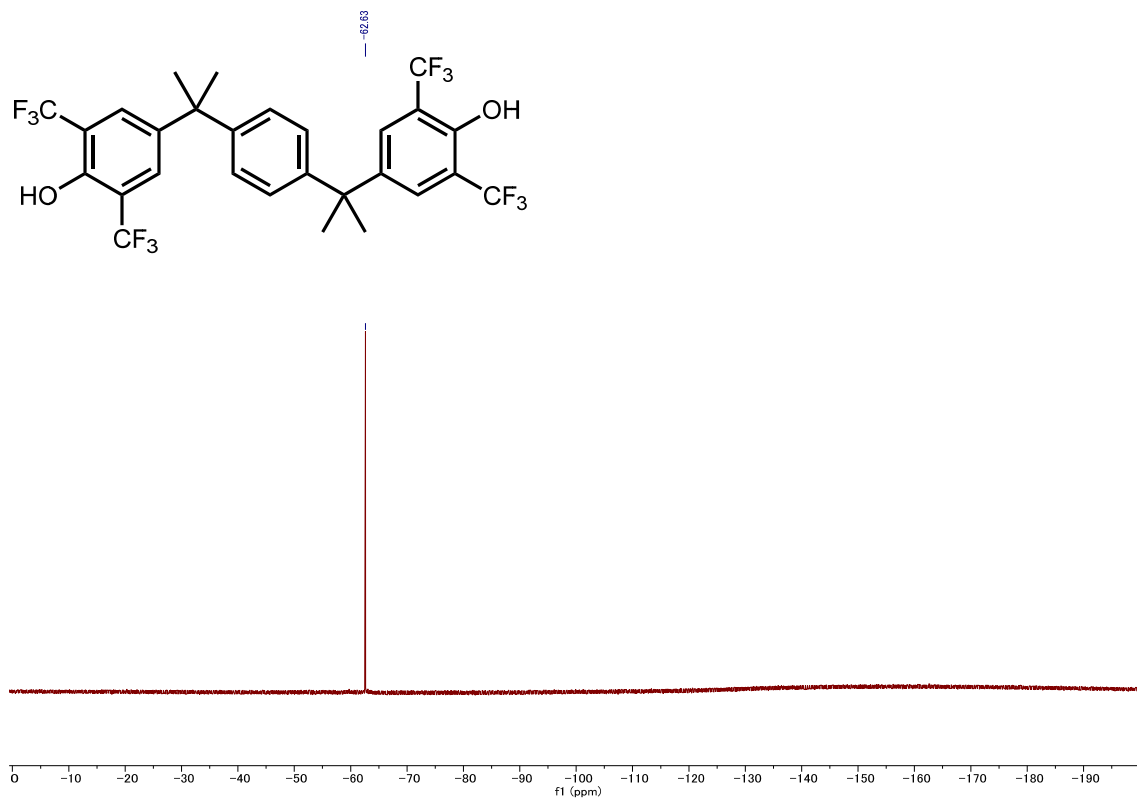

<sup>1</sup>H NMR (500 MHz, d-DMSO)

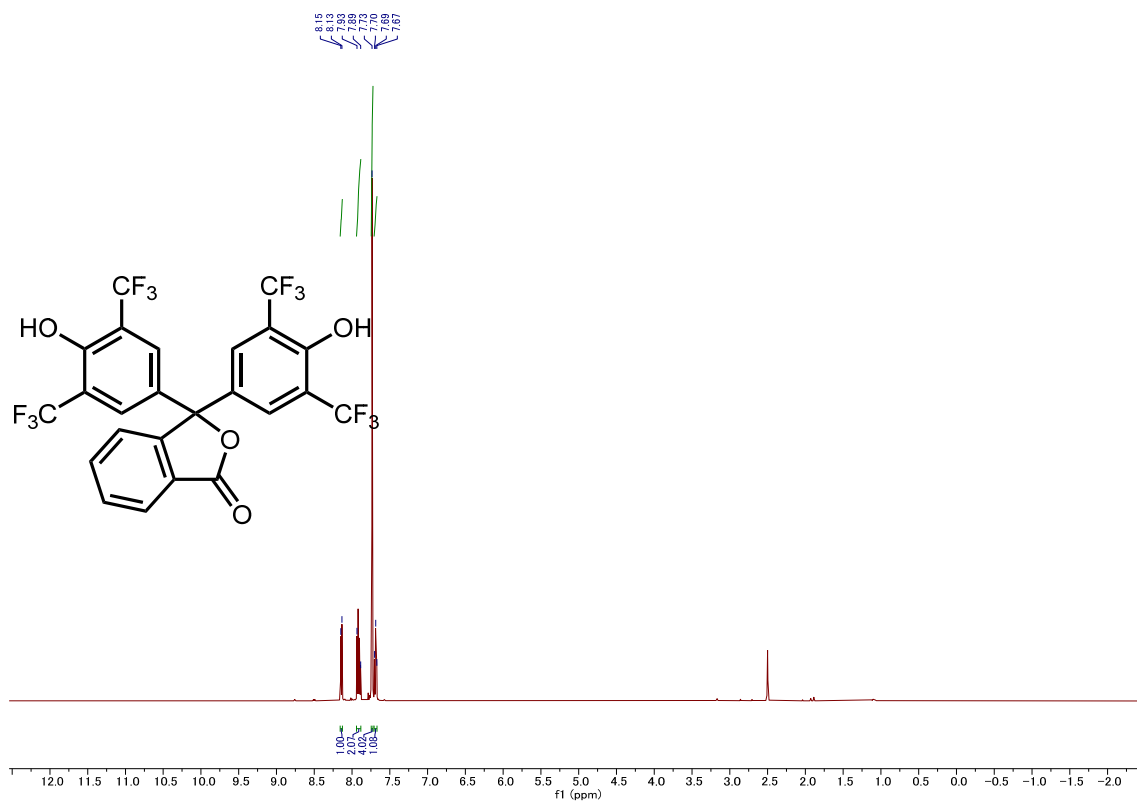

<sup>13</sup>C NMR (125 MHz, d-DMSO)

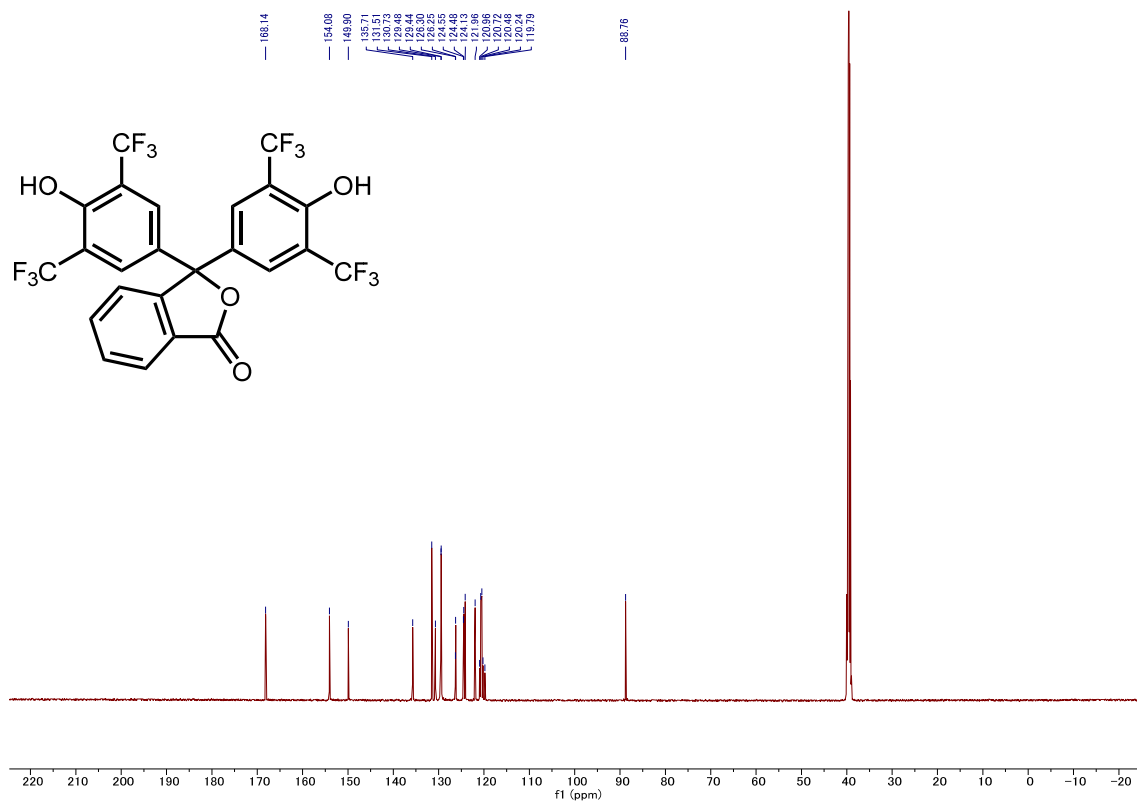

$^{19}\text{F}$  NMR (471 MHz,  $\text{CDCl}_3$ )

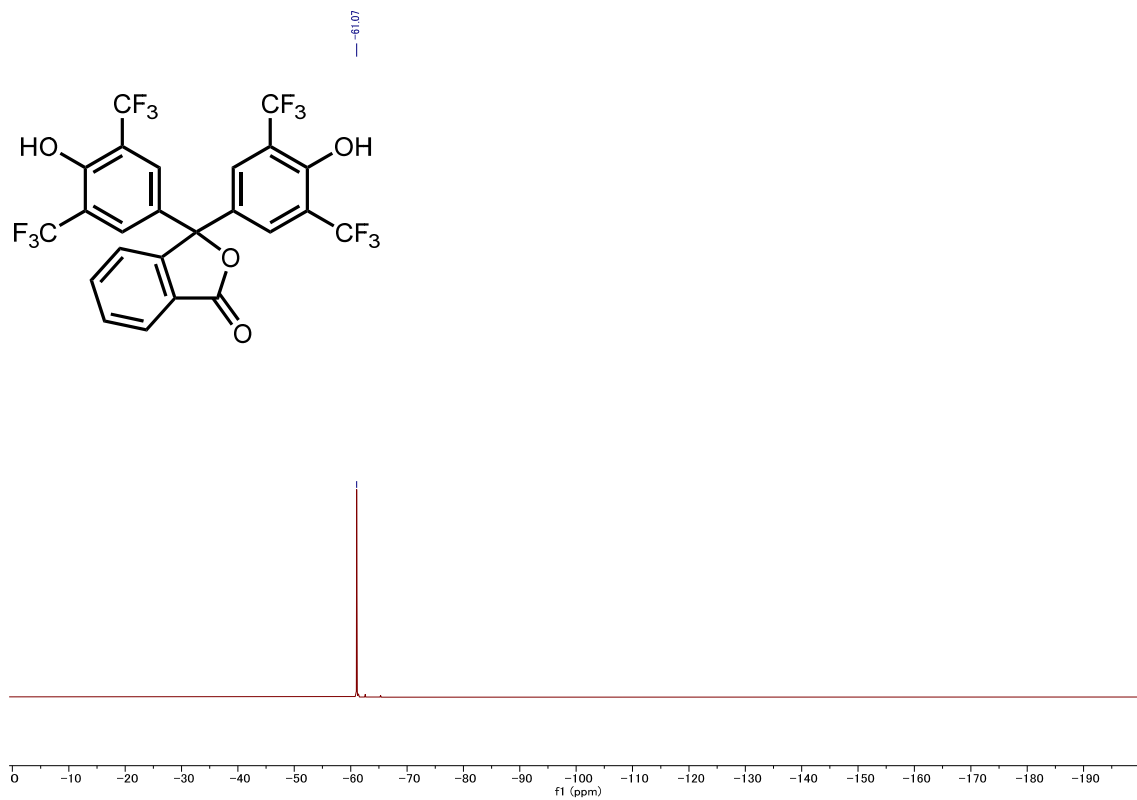

Supplement: d4cc06221c1.pdf [file d4cc06221c1.pdf]
